# Supplementary material for: β-Silicon-effect-promoted intermolecular site-selective C(sp3)–H amination with dirhodium nitrenes
Source: Royal Society of Chemistry journal article supplement (doi:10.1039/d0cc00959h), 2020-01-01

## Electronic Supplementary Information

### $\beta$ -Silicon-Effect-Promoted Intermolecular Site-Selective C(sp<sup>3</sup>)-H Amination with Dirhodium Nitrenes

Ryo Ninomiya,<sup>‡</sup> Kenta Arai,<sup>‡</sup> Gong Chen, Kazuhiro Morisaki, Takeo Kawabata, Yoshihiro Ueda\*

*Institute for Chemical Research, Kyoto University, Gokasho, Uji, Kyoto, 611-0011, Japan*

<sup>‡</sup>*These authors contributed equally.*

e-mail: ueda@fos.kuicr.kyoto-u.ac.jp

#### Contents:

|                                                                                                      |     |
|------------------------------------------------------------------------------------------------------|-----|
| General                                                                                              | S2  |
| List of abbreviation                                                                                 | S2  |
| Optimization of conditions for dirhodium-catalyzed intermolecular C-H amination ( <b>Table S1</b> )  | S3  |
| Effects of base and solvent on dirhodium-catalyzed intermolecular C-H amination ( <b>Table S2</b> )  | S4  |
| Effects of aminating agents on dirhodium-catalyzed intermolecular C-H amination ( <b>Table S3</b> )  | S4  |
| General procedure for dirhodium-catalyzed intermolecular C-H amination                               | S5  |
| Specific procedures and characterization data of 2,2,2-trichloroethylcarbamate <b>2</b> and <b>6</b> | S5  |
| Synthesis of substrates and characterization data of new compounds                                   | S16 |
| KIE measurements ( <b>Scheme S1, S2</b> and <b>Figure S1, S2</b> )                                   | S21 |
| Computational details ( <b>Figure S3, S4</b> and <b>S5</b> )                                         | S25 |
| References                                                                                           | S44 |
| <sup>1</sup> H, <sup>13</sup> C and <sup>19</sup> F NMR spectra of new compounds                     | S46 |

**General.**  $^1\text{H}$  NMR spectra were recorded on BRUKER Ultrashield Plus (400 MHz) and JEOL ECX-400 (400 MHz), and are reported in ppm using solvent resonance as the internal standard ( $\text{C}_6\text{D}_6$  at 7.16 ppm,  $\text{CDCl}_3$  at 7.26 ppm). Chemical shifts are reported in ppm. When peak multiplicities are reported, the following abbreviations are used: s, singlet; d, doublet; t, triplet; quint, quintet; sept, septet; m, multiplet; br, broadened.  $^{13}\text{C}$  NMR spectra were recorded on Ultrashield Plus (100 MHz), JEOL ECX-400 (100 MHz), BRUKER Ascend (125 MHz) and JEOL ECA-600 (150 MHz) and are reported in ppm using solvent resonance as the internal standard ( $\text{CDCl}_3$  at 77.16 ppm).  $^{19}\text{F}$  NMR spectra were recorded on BRUKER Ultrashield Plus (376 MHz), and are reported in ppm using solvent resonance as the internal standard (trifluoroacetic acid at -76.55 ppm). Infrared (IR) spectra were recorded using HORIBA FT-720. High-resolution mass spectra (HRMS) were obtained on WATERS H-class/Xevo G2-XS and Bruker Impact HD mass spectrometers for ESI, and were obtained on JEOL JMS-700 mass spectrometer for EI. Column chromatography was performed on silica gel 60N (spherical, neutral, KANTO). Preparative TLC was performed on precoated plates (0.50 mm, Merck). TrocNHOTs<sup>1</sup>, Rh<sub>2</sub>(tpa)<sub>4</sub><sup>2</sup> and Rh<sub>2</sub>(piv)<sub>4</sub><sup>3</sup> were prepared according to the literature procedure. Rh<sub>2</sub>(oct)<sub>4</sub> was purchased from TCI. Rh<sub>2</sub>(*n*-C<sub>3</sub>F<sub>7</sub>CO<sub>2</sub>)<sub>4</sub>, Rh<sub>2</sub>(esp)<sub>2</sub>, and KOAc were purchased from Sigma-Aldrich. K<sub>2</sub>CO<sub>3</sub>, Na<sub>2</sub>CO<sub>3</sub>, Cs<sub>2</sub>CO<sub>3</sub> and K<sub>3</sub>PO<sub>4</sub> were purchased from Wako Chemical. Anhydrous chlorobenzene and trifluoromethylbenzene were purchased from Sigma-Aldrich. Anhydrous dichloromethane, THF, Et<sub>2</sub>O and AcOEt were purchased from Kanto Kagaku.

### List of abbreviation

|                                    |                                                                                         |
|------------------------------------|-----------------------------------------------------------------------------------------|
| Ns                                 | 2-nitrobenzenesulfonyl                                                                  |
| Py                                 | pyridine                                                                                |
| Rh <sub>2</sub> (esp) <sub>2</sub> | bis[rhodium( $\alpha,\alpha,\alpha',\alpha'$ -tetramethyl-1,3-benzenedipropionic acid)] |
| Rh <sub>2</sub> (oct) <sub>4</sub> | rhodium(II) octanoate dimer                                                             |
| Rh <sub>2</sub> (piv) <sub>4</sub> | rhodium(II) pivalate dimer                                                              |
| Rh <sub>2</sub> (tpa) <sub>4</sub> | rhodium(II) triphenylacetate dimer                                                      |
| THF                                | tetrahydrofuran                                                                         |
| Troc                               | 2,2,2-trichloroethoxycarbonyl                                                           |
| Ts                                 | <i>p</i> -toluenesulfonyl                                                               |

**Table S1. Optimization of conditions for dirhodium-catalyzed intermolecular C-H amination**

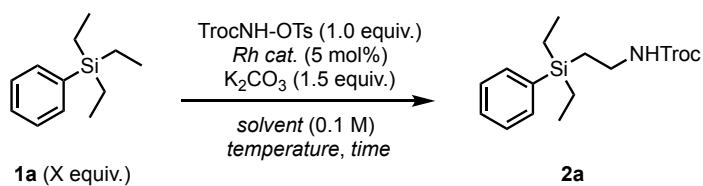

| entry | catalyst                                                                                 | solvent                         | equiv of <b>1a</b> | Temp (°C) | time (h) | yield <sup>a</sup>      |
|-------|------------------------------------------------------------------------------------------|---------------------------------|--------------------|-----------|----------|-------------------------|
| 1     | Rh <sub>2</sub> (tpa) <sub>4</sub>                                                       | PhCl                            | 10                 | 20        | 12       | 80% (72% <sup>b</sup> ) |
| 2     | Rh <sub>2</sub> (oct) <sub>4</sub>                                                       | PhCl                            | 10                 | 20        | 12       | 11%                     |
| 3     | Rh <sub>2</sub> (piv) <sub>4</sub>                                                       | PhCl                            | 10                 | 20        | 12       | 14%                     |
| 4     | Rh <sub>2</sub> ( <i>n</i> -C <sub>3</sub> F <sub>7</sub> CO <sub>2</sub> ) <sub>4</sub> | PhCl                            | 10                 | 20        | 12       | 0%                      |
| 5     | Rh <sub>2</sub> (esp) <sub>2</sub>                                                       | PhCl                            | 10                 | 20        | 12       | 45%                     |
| ----- |                                                                                          |                                 |                    |           |          |                         |
| 6     | Rh <sub>2</sub> (tpa) <sub>4</sub>                                                       | CH <sub>2</sub> Cl <sub>2</sub> | 10                 | 20        | 12       | 0%                      |
| 7     | Rh <sub>2</sub> (oct) <sub>4</sub>                                                       | CH <sub>2</sub> Cl <sub>2</sub> | 10                 | 20        | 12       | 7%                      |
| 8     | Rh <sub>2</sub> (piv) <sub>4</sub>                                                       | CH <sub>2</sub> Cl <sub>2</sub> | 10                 | 20        | 12       | 13%                     |
| 9     | Rh <sub>2</sub> ( <i>n</i> -C <sub>3</sub> F <sub>7</sub> CO <sub>2</sub> ) <sub>4</sub> | CH <sub>2</sub> Cl <sub>2</sub> | 10                 | 20        | 12       | 0%                      |
| 10    | Rh <sub>2</sub> (esp) <sub>2</sub>                                                       | CH <sub>2</sub> Cl <sub>2</sub> | 10                 | 20        | 12       | 16%                     |
| ----- |                                                                                          |                                 |                    |           |          |                         |
| 11    | Rh <sub>2</sub> (tpa) <sub>4</sub>                                                       | AcOEt                           | 10                 | 20        | 12       | 46%                     |
| 12    | Rh <sub>2</sub> (oct) <sub>4</sub>                                                       | AcOEt                           | 10                 | 20        | 12       | 6%                      |
| 13    | Rh <sub>2</sub> (piv) <sub>4</sub>                                                       | AcOEt                           | 10                 | 20        | 12       | 15%                     |
| 14    | Rh <sub>2</sub> ( <i>n</i> -C <sub>3</sub> F <sub>7</sub> CO <sub>2</sub> ) <sub>4</sub> | AcOEt                           | 10                 | 20        | 12       | 0%                      |
| 15    | Rh <sub>2</sub> (esp) <sub>2</sub>                                                       | AcOEt                           | 10                 | 20        | 12       | 35%                     |
| ----- |                                                                                          |                                 |                    |           |          |                         |
| 16    | Rh <sub>2</sub> (tpa) <sub>4</sub>                                                       | MeOH                            | 10                 | 20        | 12       | 0%                      |
| 17    | Rh <sub>2</sub> (oct) <sub>4</sub>                                                       | MeOH                            | 10                 | 20        | 12       | 0%                      |
| 18    | Rh <sub>2</sub> (piv) <sub>4</sub>                                                       | MeOH                            | 10                 | 20        | 12       | 0%                      |
| 19    | Rh <sub>2</sub> ( <i>n</i> -C <sub>3</sub> F <sub>7</sub> CO <sub>2</sub> ) <sub>4</sub> | MeOH                            | 10                 | 20        | 12       | 0%                      |
| 20    | Rh <sub>2</sub> (esp) <sub>2</sub>                                                       | MeOH                            | 10                 | 20        | 12       | 0%                      |
| ----- |                                                                                          |                                 |                    |           |          |                         |
| 21    | Rh <sub>2</sub> (tpa) <sub>4</sub>                                                       | benzene                         | 10                 | 20        | 12       | 72%                     |
| 22    | Rh <sub>2</sub> (tpa) <sub>4</sub>                                                       | PhCF <sub>3</sub>               | 10                 | 20        | 12       | 40%                     |
| 23    | Rh <sub>2</sub> (tpa) <sub>4</sub>                                                       | PhCl                            | 1.5                | 20        | 12       | 21%                     |
| 24    | Rh <sub>2</sub> (tpa) <sub>4</sub>                                                       | PhCl                            | 5.0                | 20        | 12       | 64%                     |
| 25    | Rh <sub>2</sub> (tpa) <sub>4</sub>                                                       | PhCl                            | 10                 | 0         | 24       | 56%                     |
| 26    | Rh <sub>2</sub> (tpa) <sub>4</sub>                                                       | PhCl                            | 10                 | 40        | 6        | 74%                     |

<sup>a</sup> Determined by <sup>1</sup>H NMR using 1,3-dinitrobenzene as an internal standard. <sup>b</sup> Isolated yield.

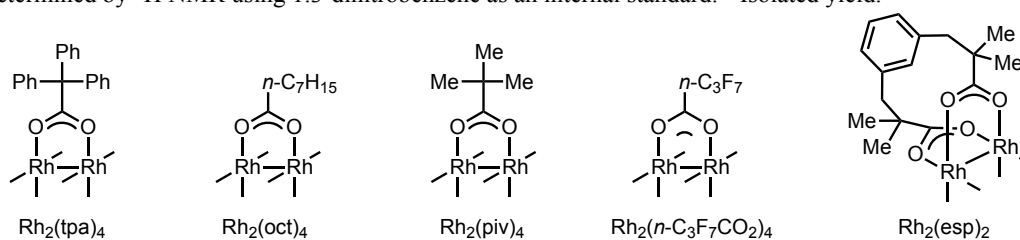

**Table S2. Effects of base and solvent on dirhodium-catalyzed intermolecular C-H amination**

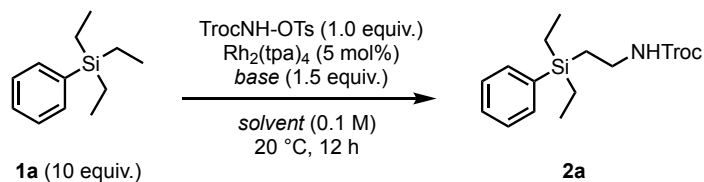

| entry | base                            | solvent | yield <sup>a</sup> |
|-------|---------------------------------|---------|--------------------|
| 1     | K <sub>2</sub> CO <sub>3</sub>  | PhCl    | 80%                |
| 2     | Cs <sub>2</sub> CO <sub>3</sub> | PhCl    | 50%                |
| 3     | K <sub>3</sub> PO <sub>4</sub>  | PhCl    | 54%                |
| 4     | KOAc                            | PhCl    | 53%                |
| 5     | KOAc                            | AcOEt   | 46%                |
| 6     | KOAc                            | MeOH    | 0%                 |

<sup>a</sup> Determined by <sup>1</sup>H NMR using 1,3-dinitrobenzene as an internal standard.

**Table S3. Effects of aminating agents on dirhodium-catalyzed intermolecular C-H amination**

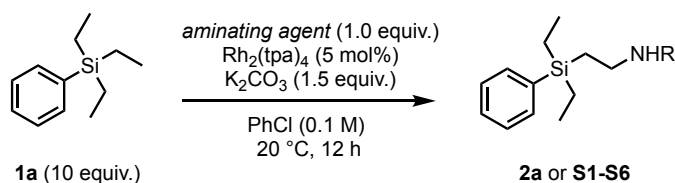

| entry | aminating agents                                                                                    | results                                                                                      | entry          | aminating agents                                                                                   | results                                                  |
|-------|-----------------------------------------------------------------------------------------------------|----------------------------------------------------------------------------------------------|----------------|----------------------------------------------------------------------------------------------------|----------------------------------------------------------|
| 1     | 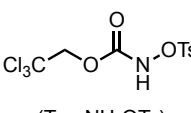<br>(TrocNH-OTs) | 72% yield<br><b>2a</b> : R = Troc                                                            | 5              | <br><b>S9</b>  | 0% yield<br><b>S3</b> : R = CO <sub>2</sub> Et           |
| 2     | <br>(TrocNH-OMs) | 66% yield<br><b>2a</b> : R = Troc                                                            | 6              | <br><b>S10</b> | 0% yield<br><b>S4</b> : R = CO <sub>2</sub> <i>t</i> -Bu |
| 3     | <br><b>S7</b>    | 24% yield<br><b>S1</b> : R = CO <sub>2</sub> CH <sub>2</sub> CF <sub>3</sub>                 | 7 <sup>a</sup> | <br><b>S11</b> | 0% yield<br><b>S5</b> : R = Ts                           |
| 4     | <br><b>S8</b>    | 12% yield<br><b>S2</b> : R = CO <sub>2</sub> CH <sub>2</sub> (CF <sub>3</sub> ) <sub>2</sub> | 8 <sup>a</sup> | <br><b>S12</b> | 0% yield<br><b>S6</b> : R = Ns                           |

<sup>a</sup>Run without K<sub>2</sub>CO<sub>3</sub>.

### General procedure for dirhodium-catalyzed intermolecular C-H amination

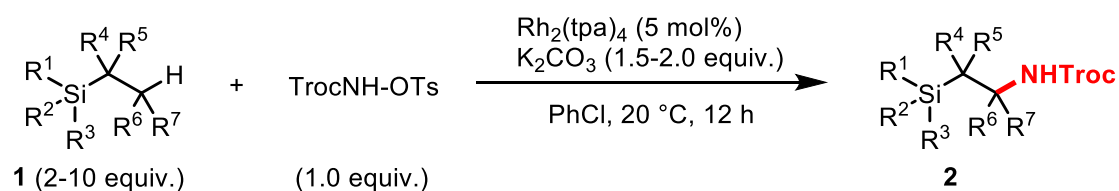

To a suspension of silanes **1** (0.50 mmol, 10 equiv.), TrocNHOTs (18.1 mg, 0.05 mmol, 1.0 equiv.) and K<sub>2</sub>CO<sub>3</sub> (10.4 mg, 0.075 mmol, 1.5 equiv.) in PhCl (0.5 mL) were added Rh<sub>2</sub>(tpa)<sub>4</sub> (3.4 mg, 0.0025 mmol, 0.05 equiv.) at 20 °C. After being stirred for 12 h, the reaction was quenched by addition of water and extracted with CHCl<sub>3</sub>. The organic layer was washed with brine, and dried over Na<sub>2</sub>SO<sub>4</sub>, filtered, and concentrated. The residue was purified by preparative thin-layer chromatography purification to afford the aminated product **2**.

### Specific procedures and characterization data of 2,2,2-trichloroethylcarbamate **2** and **6**

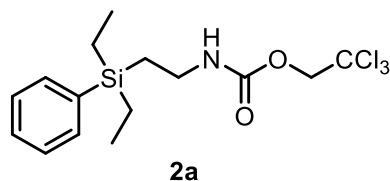

Following the general procedure for intermolecular amination, **1a** (96.2 mg, 0.50 mmol, 10 equiv.), TrocNHOTs (18.1 mg, 0.05 mmol, 1.0 equiv.), K<sub>2</sub>CO<sub>3</sub> (10.4 mg, 0.075 mmol, 1.5 equiv.), and Rh<sub>2</sub>(tpa)<sub>4</sub> (3.4 mg, 0.0025 mmol, 0.05 equiv.) were stirred at 20 °C in PhCl (0.5 mL) for 12 h. The crude material was purified by preparative thin-layer chromatography purification (CHCl<sub>3</sub>/hexane = 2/1) to afford **2a** (13.7 mg, 72%) as a colorless oil.

Analytical data: <sup>1</sup>H NMR (400 MHz, CDCl<sub>3</sub>, 313K) δ: 7.51–7.47 (m, 2H), 7.39–7.34 (m, 3H), 4.85 (br s, 1H), 4.69 (s, 2H), 3.33–3.26 (m, 2H), 1.17–1.13 (m, 2H), 1.03–0.99 (m, 6H), 0.89–0.82 (m, 4H); <sup>13</sup>C NMR (100 MHz, CDCl<sub>3</sub>) δ: 154.3, 136.1, 134.2, 129.4, 128.1, 95.8, 74.6, 37.9, 13.8, 7.4, 3.7; IR (neat, cm<sup>-1</sup>): 3328, 2952, 2360, 1737, 1508, 1365, 1230, 1133, 1014, 721; HRMS-ESI<sup>+</sup> (*m/z*): Calcd. for C<sub>15</sub>H<sub>22</sub>Cl<sub>3</sub>NO<sub>2</sub>Si [M+Na]<sup>+</sup> 404.0383; found, 404.0381.

### Procedure for C-H amination of **1a** on 1 mmol scale

To a suspension of **1a** (1.92 g, 10 mmol, 10 equiv.), TrocNHOTs (363 mg, 1.0 mmol, 1.0 equiv.), K<sub>2</sub>CO<sub>3</sub> (207 mg, 1.5 mmol, 1.5 equiv.) in PhCl (10 mL) were added Rh<sub>2</sub>(tpa)<sub>4</sub> (67.8 mg, 0.05 mmol, 0.05 equiv.) at 20 °C. After being stirred for 12 h, the reaction was quenched by addition of water

and extracted with CHCl<sub>3</sub>. The organic layer was washed with brine, and dried over Na<sub>2</sub>SO<sub>4</sub>, filtered, and concentrated. The residue was chromatographed on silica gel (CHCl<sub>3</sub>/Hexane = 2/1) to afford **2a** (288 mg, 75%) as a colorless oil.

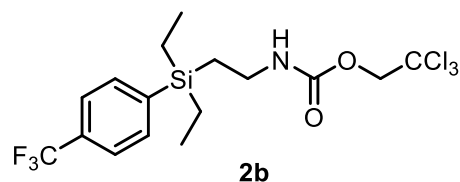

Following the general procedure for intermolecular amination, **1b** (130.2 mg, 0.50 mmol, 10 equiv.), TrocNHOTs (18.1 mg, 0.05 mmol, 1.0 equiv.), K<sub>2</sub>CO<sub>3</sub> (10.4 mg, 0.075 mmol, 1.5 equiv.), and Rh<sub>2</sub>(tpa)<sub>4</sub> (3.4 mg, 0.0025 mmol, 0.05 equiv.) were stirred at 20 °C in PhCl (0.5 mL) for 12 h. The crude material was purified by preparative thin-layer chromatography purification (CHCl<sub>3</sub>/hexane = 2/1) to afford **2b** (12.9 mg, 57%) as a colorless oil.

Analytical data: <sup>1</sup>H NMR (400 MHz, CDCl<sub>3</sub>, 313K) δ: 7.61 (s, 4H), 4.88 (br s, 1H), 4.69 (s, 2H), 3.42–3.25 (m, 2H), 1.12–1.06 (m, 2H), 1.04–0.98 (m, 6H), 0.92–0.83 (m, 4H); <sup>13</sup>C NMR (150 MHz, CDCl<sub>3</sub>) δ: 154.3, 141.3, 134.4, 131.3 (q, *J* = 31.5 Hz), 124.6, 124.3 (q, *J* = 271.5 Hz), 95.7, 74.6, 37.6, 13.7, 7.3, 3.5; <sup>19</sup>F NMR (376 MHz, CDCl<sub>3</sub>) δ: -63.7 (s); IR (neat, cm<sup>-1</sup>): 3446, 3341, 2957, 1725, 1516, 1326, 1240, 1129, 1061, 726; HRMS-ESI<sup>+</sup> (*m/z*): Calcd. for C<sub>16</sub>H<sub>21</sub>Cl<sub>3</sub>F<sub>3</sub>NO<sub>2</sub>Si [M+Na]<sup>+</sup> 472.0251; found, 472.0214.

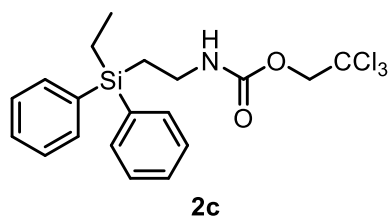

Following the general procedure for intermolecular amination, **1c**<sup>4</sup> (120 mg, 0.50 mmol, 10 equiv.), TrocNHOTs (18.1 mg, 0.05 mmol, 1.0 equiv.), K<sub>2</sub>CO<sub>3</sub> (10.4 mg, 0.075 mmol, 1.5 equiv.), and Rh<sub>2</sub>(tpa)<sub>4</sub> (3.4 mg, 0.0025 mmol, 0.05 equiv.) were stirred at 20 °C in PhCl (0.5 mL) for 12 h. The crude material was purified by preparative thin-layer chromatography purification (CHCl<sub>3</sub>/hexane = 2/1) to afford **2c** (9.9 mg, 46%) as a colorless oil.

Analytical data: <sup>1</sup>H NMR (400 MHz, CDCl<sub>3</sub>, 313K) δ: 7.53–7.51 (m, 4H), 7.43–7.30 (m, 6H), 4.85 (br s, 1H), 4.68 (s, 2H), 3.36–3.31 (m, 2H), 1.47–1.43 (m, 2H), 1.17–1.11 (m, 2H), 1.06–1.02 (m, 3H); <sup>13</sup>C NMR (100 MHz, CDCl<sub>3</sub>) δ: 154.3, 134.9, 129.7, 128.2, 95.8, 74.5, 37.8, 14.2, 7.5, 4.5; IR

(neat,  $\text{cm}^{-1}$ ): 3328, 2952, 1716, 1513, 1232, 1110, 1027, 815, 700; **HRMS-ESI**<sup>+</sup> ( $m/z$ ): Calcd. for  $\text{C}_{19}\text{H}_{22}\text{Cl}_3\text{NO}_2\text{Si}$  [ $\text{M}+\text{Na}$ ]<sup>+</sup> 452.0383; found, 452.0404.

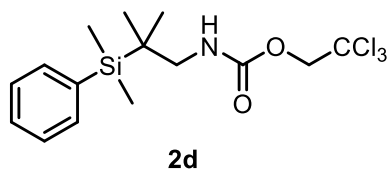

Following the general procedure for intermolecular amination, **1d** (96.2 mg, 0.50 mmol, 10 equiv.), TrocNHOTs (18.1 mg, 0.05 mmol, 1.0 equiv.),  $\text{K}_2\text{CO}_3$  (10.4 mg, 0.075 mmol, 1.5 equiv.), and  $\text{Rh}_2(\text{tpa})_4$  (3.4 mg, 0.0025 mmol, 0.05 equiv.) were stirred at 20 °C in PhCl (0.5 mL) for 12 h. The crude material was purified by preparative thin-layer chromatography purification ( $\text{CHCl}_3/\text{hexane} = 2/1$ ) to afford **2d** (4.8 mg, 25%) as a colorless oil.

Analytical data: **<sup>1</sup>H NMR** (400 MHz,  $\text{CDCl}_3$ , 313K)  $\delta$ : 7.54–7.51 (m, 2H), 7.37–7.34 (m, 3H), 4.85 (br s, 1H), 4.59 (s, 2H), 1.48 (s, 2H), 1.32 (s, 6H), 0.36 (s, 6H); **<sup>13</sup>C NMR** (100 MHz,  $\text{CDCl}_3$ )  $\delta$ : 152.5, 139.3, 133.7, 129.2, 128.1, 96.0, 74.1, 53.8, 30.6, 30.2, -1.1; **IR** (neat,  $\text{cm}^{-1}$ ): 3332, 2969, 2360, 1739, 1506, 1455, 1228, 1110, 835, 715; **HRMS-ESI**<sup>+</sup> ( $m/z$ ): Calcd. for  $\text{C}_{15}\text{H}_{22}\text{Cl}_3\text{NO}_2\text{Si}$  [ $\text{M}+\text{Na}$ ]<sup>+</sup> 404.0383; found, 404.0379.

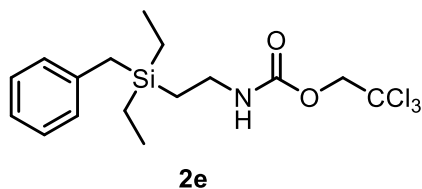

Following the general procedure for intermolecular amination, **1e**<sup>5</sup> (103 mg, 0.50 mmol, 10 equiv.), TrocNHOTs (18.1 mg, 0.05 mmol, 1.0 equiv.),  $\text{K}_2\text{CO}_3$  (10.4 mg, 0.075 mmol, 1.5 equiv.), and  $\text{Rh}_2(\text{tpa})_4$  (3.4 mg, 0.0025 mmol, 0.05 equiv.) were stirred at 20 °C in PhCl (0.5 mL) for 12 h. The crude material was purified by preparative thin-layer chromatography purification ( $\text{CHCl}_3/\text{hexane} = 2/1$ ) to afford **2e** (10.5 mg, 53%) as a colorless oil.

Analytical data: **<sup>1</sup>H NMR** (400 MHz,  $\text{CDCl}_3$ , 313K)  $\delta$ : 7.23–7.19 (m, 2H), 7.09–7.06 (m, 1H), 7.02 (d,  $J = 7.2$  Hz, 2H), 4.80 (br s, 1H), 4.71 (s, 2H), 3.25–3.19 (m, 2H), 2.14 (s, 2H), 0.96 (t,  $J = 7.9$  Hz, 6H), 0.89–0.84 (m, 2H), 0.58 (q,  $J = 7.9$  Hz, 4H); **<sup>13</sup>C NMR** (100 MHz,  $\text{CDCl}_3$ )  $\delta$ : 154.3, 139.9, 128.5, 128.2, 124.4, 95.8, 74.6, 37.7, 21.9, 13.4, 7.4, 3.5; **IR** (neat,  $\text{cm}^{-1}$ ): 3332, 2950, 2358, 1737, 1515, 1365, 1230, 1133, 1027, 767, 721; **HRMS-ESI**<sup>+</sup> ( $m/z$ ): Calcd. for  $\text{C}_{16}\text{H}_{24}\text{Cl}_3\text{NO}_2\text{Si}$  [ $\text{M}+\text{Na}$ ]<sup>+</sup> 418.0540; found, 418.0533.

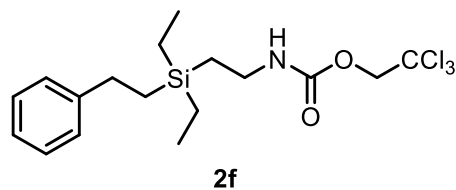

Following the general procedure for intermolecular amination, **1f**<sup>6</sup> (110 mg, 0.50 mmol, 10 equiv.), TrocNHOTs (18.1 mg, 0.05 mmol, 1.0 equiv.), K<sub>2</sub>CO<sub>3</sub> (10.4 mg, 0.075 mmol, 1.5 equiv.), and Rh<sub>2</sub>(tpa)<sub>4</sub> (3.4 mg, 0.0025 mmol, 0.05 equiv.) were stirred at 20 °C in PhCl (0.5 mL) for 12 h. The crude material was purified by preparative thin-layer chromatography purification (CHCl<sub>3</sub>/hexane = 2/1) to afford **2f** (12.9 mg, 63%) as a colorless oil.

Analytical data: **<sup>1</sup>H NMR** (400 MHz, CDCl<sub>3</sub>, 313K) δ: 7.30–7.26 (m, 2H), 7.21–7.15 (m, 3H), 4.86 (br s, 1H), 4.72 (s, 2H), 3.32–3.26 (m, 2H), 2.67–2.62 (m, 2H), 1.00–0.88 (m, 10H), 0.64–0.58 (m, 4H); **<sup>13</sup>C NMR** (100 MHz, CDCl<sub>3</sub>) δ: 154.3, 145.0, 128.5, 127.9, 125.8, 95.8, 74.6, 37.9, 30.0, 13.9, 13.7, 7.5, 3.7; **IR** (neat, cm<sup>-1</sup>): 3328, 2950, 2360, 1735, 1515, 1371, 1228, 1133, 1129, 813, 727; **HRMS-ESI**<sup>+</sup> (*m/z*): Calcd. for C<sub>17</sub>H<sub>26</sub>Cl<sub>3</sub>NO<sub>2</sub>Si [M+Na]<sup>+</sup> 432.0696; found, 432.0690.

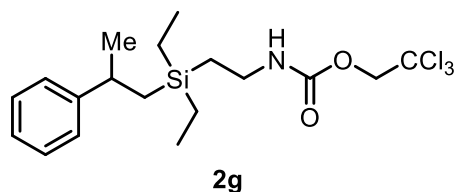

Following the general procedure for intermolecular amination, **1g**<sup>6</sup> (117 mg, 0.50 mmol, 10 equiv.), TrocNHOTs (18.1 mg, 0.05 mmol, 1.0 equiv.), K<sub>2</sub>CO<sub>3</sub> (10.4 mg, 0.075 mmol, 1.5 equiv.), and Rh<sub>2</sub>(tpa)<sub>4</sub> (3.4 mg, 0.0025 mmol, 0.05 equiv.) were stirred at 20 °C in PhCl (0.5 mL) for 12 h. The crude material was purified by preparative thin-layer chromatography purification (CHCl<sub>3</sub>/hexane = 2/1) to afford **2g** (14.5 mg, 68%) as a colorless oil.

Analytical data: **<sup>1</sup>H NMR** (400 MHz, CDCl<sub>3</sub>, 313K) δ: 7.29–7.26 (m, 2H), 7.23–7.15 (m, 3H), 4.71 (br s, 3H), 3.23–3.07 (m, 2H), 2.92–2.84 (m, 1H), 1.30 (d, *J* = 6.8 Hz, 3H), 1.08–1.02 (m, 1H), 0.97–0.91 (m, 1H), 0.89 (t, *J* = 7.9 Hz, 6H), 0.78–0.70 (m, 1H), 0.68–0.60 (m, 1H), 0.54–0.39 (m, 4H); **<sup>13</sup>C NMR** (100 MHz, CDCl<sub>3</sub>) δ: 154.2, 149.5, 128.5, 126.8, 126.2, 95.9, 74.5, 37.8, 36.3, 27.0, 22.0, 13.8, 7.5, 4.1, 4.0; **IR** (neat, cm<sup>-1</sup>): 3325, 2950, 2360, 1739, 1508, 1371, 1228, 1133, 1014, 725; **HRMS-ESI**<sup>+</sup> (*m/z*): Calcd. for C<sub>18</sub>H<sub>28</sub>Cl<sub>3</sub>NO<sub>2</sub>Si [M+Na]<sup>+</sup> 446.0853; found, 446.0854.



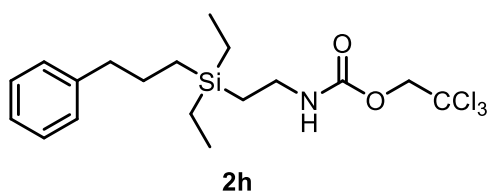

Following the general procedure for intermolecular amination, **1h**<sup>6</sup> (117 mg, 0.50 mmol, 10 equiv.), TrocNHOTs (18.1 mg, 0.05 mmol, 1.0 equiv.), K<sub>2</sub>CO<sub>3</sub> (10.4 mg, 0.075 mmol, 1.5 equiv.), and Rh<sub>2</sub>(tpa)<sub>4</sub> (3.4 mg, 0.0025 mmol, 0.05 equiv.) were stirred at 20 °C in PhCl (0.5 mL) for 12 h. The crude material was purified by preparative thin-layer chromatography purification (CHCl<sub>3</sub>/hexane = 2/1) to afford **2h** (12.4 mg, 58%) as a colorless oil.

Analytical data: <sup>1</sup>H NMR (400 MHz, CDCl<sub>3</sub>, 313K) δ: 7.30–7.26 (m, 2H), 7.20–7.16 (m, 3H), 4.85 (br s, 1H), 4.72 (s, 2H), 3.29–3.23 (m, 2H), 2.63 (t, *J* = 7.6 Hz, 2H), 1.67–1.59 (m, 2H), 0.93 (t, *J* = 7.9 Hz, 6H), 0.89–0.85 (m, 2H), 0.63–0.58 (m, 2H), 0.55 (q, *J* = 7.9 Hz, 4H); <sup>13</sup>C NMR (100 MHz, CDCl<sub>3</sub>) δ: 154.3, 142.5, 128.6, 128.4, 125.9, 95.8, 74.6, 40.2, 38.0, 26.0, 13.7, 11.6, 7.5, 3.7; IR (neat, cm<sup>-1</sup>): 3325, 2948, 2360, 1739, 1508, 1365, 1228, 1133, 1029, 721; HRMS-ESI<sup>+</sup> (*m/z*): Calcd. for C<sub>18</sub>H<sub>28</sub>Cl<sub>3</sub>NO<sub>2</sub>Si [M+Na]<sup>+</sup> 446.0853; found, 446.0850.

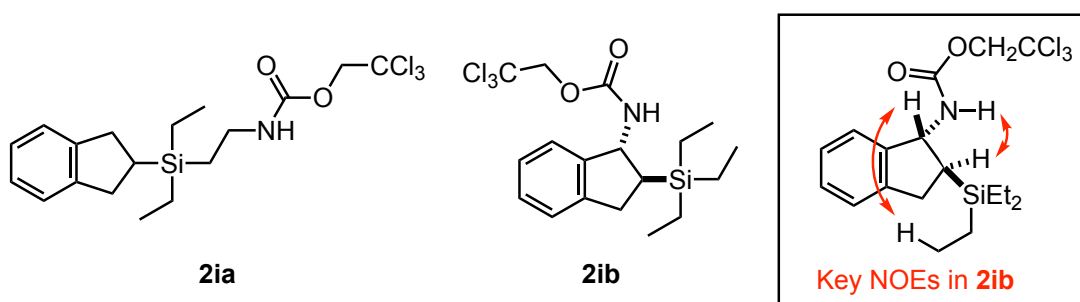

Following the general procedure for intermolecular amination, **1i**<sup>6</sup> (116 mg, 0.50 mmol, 10 equiv.), TrocNHOTs (18.1 mg, 0.05 mmol, 1.0 equiv.), K<sub>2</sub>CO<sub>3</sub> (10.4 mg, 0.075 mmol, 1.5 equiv.), and Rh<sub>2</sub>(tpa)<sub>4</sub> (3.4 mg, 0.0025 mmol, 0.05 equiv.) were stirred at 20 °C in PhCl (0.5 mL) for 12 h. The crude material was purified by preparative thin-layer chromatography purification (CHCl<sub>3</sub>/hexane = 2/1) to afford **2ia** (6.8 mg, 34%) and **2ib** (6.5 mg, 31%) as a colorless oil. The relative configuration of **2ib** was assigned from the observed NOEs, shown in the square box.

Analytical data of **2ia**: <sup>1</sup>H NMR (400 MHz, CDCl<sub>3</sub>, 313K) δ: 7.23–7.19 (m, 2H), 7.14–7.10 (m, 2H), 4.88 (br s, 1H), 4.72 (s, 2H), 3.35–3.29 (m, 2H), 3.08–3.02 (m, 2H), 2.89–2.83 (m, 2H), 1.79–1.69 (m, 1H), 1.03–0.94 (m, 8H), 0.65 (q, *J* = 7.9 Hz, 4H); <sup>13</sup>C NMR (100 MHz, CDCl<sub>3</sub>) δ: 154.3, 144.5, 126.2, 124.3, 95.8, 74.6, 38.0, 35.1, 23.2, 13.2, 7.8, 3.1; IR (neat, cm<sup>-1</sup>): 3325, 2950, 2360, 1737,

1508, 1373, 1230, 1133, 1016, 725; **HRMS-ESI**<sup>+</sup> (*m/z*): Calcd. for C<sub>18</sub>H<sub>26</sub>Cl<sub>3</sub>NO<sub>2</sub>Si [M+Na]<sup>+</sup> 444.0696; found, 444.0692.

Analytical data of **2ib**: <sup>1</sup>H NMR (400 MHz, CDCl<sub>3</sub>, 313K) δ: 7.31–7.29 (m, 1H), 7.23–7.18 (m, 3H), 5.30 (t, *J* = 9.1 Hz, 1H), 5.07 (br d, *J* = 9.2 Hz, 1H), 4.85–4.78 (m, 2H), 3.13–3.07 (m, 1H), 2.86–2.79 (m, 1H), 1.56–1.49 (m, 1H), 0.98 (t, *J* = 7.9 Hz, 9H), 0.66 (q, *J* = 7.9 Hz, 6H); <sup>13</sup>C NMR (100 MHz, CDCl<sub>3</sub>) δ: 154.3, 144.3, 143.5, 128.1, 126.9, 124.6, 124.1, 95.9, 74.6, 58.7, 32.9, 32.2, 7.8, 2.7; **IR** (neat, cm<sup>-1</sup>): 3332, 2950, 2360, 1737, 1508, 1455, 1373, 1228, 1143, 1035, 721; **HRMS-ESI**<sup>+</sup> (*m/z*): Calcd. for C<sub>18</sub>H<sub>26</sub>Cl<sub>3</sub>NO<sub>2</sub>Si [M+Na]<sup>+</sup> 444.0696; found, 444.0693.

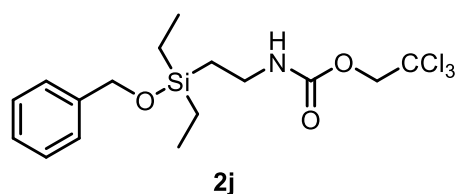

Following the general procedure for intermolecular amination, **1j**<sup>7</sup> (111 mg, 0.50 mmol, 10 equiv.), TrocNHOTs (18.1 mg, 0.05 mmol, 1.0 equiv.), K<sub>2</sub>CO<sub>3</sub> (10.4 mg, 0.075 mmol, 1.5 equiv.), and Rh<sub>2</sub>(tpa)<sub>4</sub> (3.4 mg, 0.0025 mmol, 0.05 equiv.) were stirred at 20 °C in PhCl (0.5 mL) for 12 h. The crude material was purified by preparative thin-layer chromatography purification (CHCl<sub>3</sub>/hexane = 2/1) to afford **2j** (9.0 mg, 44%) as a colorless oil.

Analytical data: <sup>1</sup>H NMR (400 MHz, CDCl<sub>3</sub>, 313K) δ: 7.37–7.23 (m, 5H), 5.16 (br s, 1H), 4.75 (s, 2H), 4.71 (s, 2H), 3.41–3.35 (m, 2H), 1.02–0.97 (m, 8H), 0.70 (q, *J* = 7.9 Hz, 4H); <sup>13</sup>C NMR (100 MHz, CDCl<sub>3</sub>) δ: 154.4, 140.7, 128.5, 127.4, 126.5, 95.9, 74.6, 65.2, 37.3, 14.3, 6.8, 5.2; **IR** (neat, cm<sup>-1</sup>): 3328, 2954, 2875, 2362, 1716, 1515, 1454, 1236, 1064, 727; **HRMS-ESI**<sup>+</sup> (*m/z*): Calcd. for C<sub>16</sub>H<sub>24</sub>Cl<sub>3</sub>NO<sub>2</sub>Si [M+Na]<sup>+</sup> 434.0489; found, 434.0486.

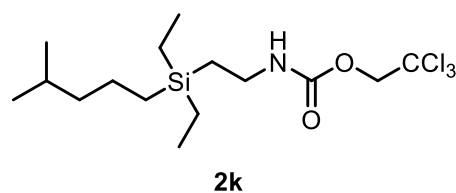

Following the general procedure for intermolecular amination, **1k** (100 mg, 0.50 mmol, 10 equiv.), TrocNHOTs (18.1 mg, 0.05 mmol, 1.0 equiv.), K<sub>2</sub>CO<sub>3</sub> (10.4 mg, 0.075 mmol, 1.5 equiv.), and Rh<sub>2</sub>(tpa)<sub>4</sub> (3.4 mg, 0.0025 mmol, 0.05 equiv.) were stirred at 20 °C in PhCl (0.5 mL) for 12 h. The crude material was purified by preparative thin-layer chromatography purification (CHCl<sub>3</sub>/hexane = 2/1) to afford **2k** (15.0 mg, 77%) as a colorless oil.

Analytical data:  $^1\text{H NMR}$  (400 MHz,  $\text{CDCl}_3$ , 313K)  $\delta$ : 4.87 (br s, 1H), 4.72 (s, 2H), 3.32–3.26 (m, 2H), 1.60–1.50 (m, 1H), 1.35–1.26 (m, 2H), 1.24–1.17 (m, 2H), 1.03–0.86 (m, 14H), 0.62–0.50 (m, 6H);  $^{13}\text{C NMR}$  (100 MHz,  $\text{CDCl}_3$ )  $\delta$ : 154.3, 95.8, 74.6, 43.4, 38.0, 27.7, 22.7, 21.6, 13.7, 11.9, 7.5, 3.8; **IR** (neat,  $\text{cm}^{-1}$ ): 3328, 2952, 2362, 1735, 1508, 1365, 1230, 1133, 1014, 721; **HRMS-ESI** $^+$  ( $m/z$ ): Calcd. for  $\text{C}_{15}\text{H}_{30}\text{Cl}_3\text{NO}_2\text{Si}$   $[\text{M}+\text{Na}]^+$  412.1009; found, 412.1002.

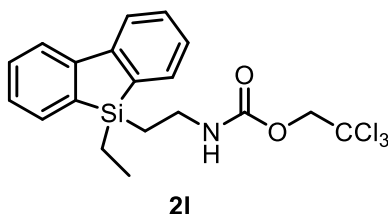

Following the general procedure for intermolecular amination, **1l**<sup>8</sup> (119 mg, 0.50 mmol, 10 equiv.), TrocNHOTs (18.1 mg, 0.05 mmol, 1.0 equiv.),  $\text{K}_2\text{CO}_3$  (10.4 mg, 0.075 mmol, 1.5 equiv.), and  $\text{Rh}_2(\text{tpa})_4$  (3.4 mg, 0.0025 mmol, 0.05 equiv.) were stirred at 20 °C in PhCl (0.5 mL) for 12 h. The crude material was purified by preparative thin-layer chromatography purification ( $\text{CHCl}_3/\text{hexane} = 2/1$ ) to afford **2l** (12.8 mg, 37%) as a colorless oil.

Analytical data:  $^1\text{H NMR}$  (400 MHz,  $\text{CDCl}_3$ , 323K)  $\delta$ : 7.83 (d,  $J = 7.8$  Hz, 2H), 7.63 (m,  $J = 6.9$  Hz, 2H), 7.45 (t,  $J = 7.3$  Hz, 2H), 7.28 (t,  $J = 7.3$  Hz, 2H), 4.71 (br s, 1H), 4.63 (s, 2H), 3.26–3.21 (m, 2H), 1.34 (t,  $J = 8.3$  Hz, 2H), 1.05–0.96 (m, 5H);  $^{13}\text{C NMR}$  (150 MHz,  $\text{CDCl}_3$ , 323K)  $\delta$ : 154.1, 148.6, 136.0, 133.3, 130.6, 127.6, 121.1, 95.7, 74.5, 37.6, 13.6, 7.3, 4.3; **IR** (neat,  $\text{cm}^{-1}$ ): 3343, 3064, 2956, 1723, 1515, 1429, 1236, 1131; **HRMS-ESI** $^+$  ( $m/z$ ): Calcd. for  $\text{C}_{19}\text{H}_{20}\text{Cl}_3\text{NO}_2\text{Si}$   $[\text{M}+\text{H}]^+$  428.0402; found, 428.0409.

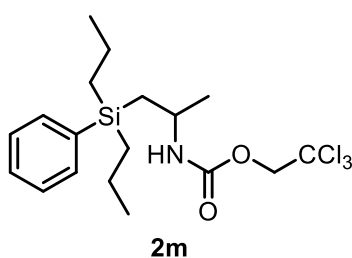

Following the general procedure for intermolecular amination, **1m** (117 mg, 0.50 mmol, 10 equiv.), TrocNHOTs (18.1 mg, 0.05 mmol, 1.0 equiv.),  $\text{K}_2\text{CO}_3$  (10.4 mg, 0.075 mmol, 1.5 equiv.), and  $\text{Rh}_2(\text{tpa})_4$  (3.4 mg, 0.0025 mmol, 0.05 equiv.) were stirred at 20 °C in PhCl (0.5 mL) for 12 h. The crude material was purified by preparative thin-layer chromatography purification ( $\text{CHCl}_3/\text{hexane} = 2/1$ ) to afford **2m** (3.8 mg, 18%) as a colorless oil.

Analytical data:  $^1\text{H NMR}$  (400 MHz,  $\text{CDCl}_3$ , 313K)  $\delta$ : 7.50–7.47 (m, 2H), 7.36–7.33 (m, 3H), 4.69–4.61 (m, 3H), 3.93–3.83 (m, 1H), 1.44–1.34 (m, 4H), 1.21–1.15 (m, 4H), 1.09–1.03 (m, 1H), 0.984

(t,  $J = 7.2$  Hz, 3H), 0.981 (t,  $J = 7.2$  Hz, 3H), 0.89–0.84 (m, 4H);  $^{13}\text{C}$  NMR (100 MHz,  $\text{CDCl}_3$ )  $\delta$ : 153.4, 137.2, 134.1, 129.2, 128.1, 95.9, 74.4, 45.5, 24.7, 22.4, 18.7, 17.5, 15.4, 15.2; IR (neat,  $\text{cm}^{-1}$ ): 3328, 2952, 2362, 1739, 1508, 1448, 1371, 1108, 1060, 811, 728; HRMS-ESI<sup>+</sup> ( $m/z$ ): Calcd. for  $\text{C}_{18}\text{H}_{28}\text{Cl}_3\text{NO}_2\text{Si}$  [ $\text{M}+\text{Na}$ ]<sup>+</sup> 446.0853; found, 446.0847.

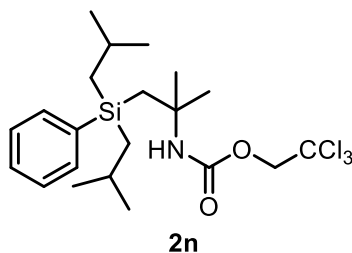

Following the general procedure for intermolecular amination, **1n** (138 mg, 0.50 mmol, 10 equiv.), TrocNHOTs (18.1 mg, 0.05 mmol, 1.0 equiv.),  $\text{K}_2\text{CO}_3$  (10.4 mg, 0.075 mmol, 1.5 equiv.), and  $\text{Rh}_2(\text{tpa})_4$  (3.4 mg, 0.0025 mmol, 0.05 equiv.) were stirred at 20 °C in PhCl (0.5 mL) for 12 h. The crude material was purified by preparative thin-layer chromatography purification ( $\text{CHCl}_3/\text{hexane} = 2/1$ ) to afford **2n** (2.3 mg, 10%) as a colorless oil.

Analytical data:  $^1\text{H}$  NMR (400 MHz,  $\text{CDCl}_3$ , 313K)  $\delta$ : 7.56–7.54 (m, 2H), 7.35–7.32 (m, 3H), 4.75 (br s, 1H), 4.56 (s, 2H), 1.86 (sep,  $J = 6.6$  Hz, 2H), 1.45 (s, 2H), 1.26 (s, 6H), 0.95 (d,  $J = 6.5$  Hz, 6H), 0.89 (d,  $J = 6.6$  Hz, 6H);  $^{13}\text{C}$  NMR (100 MHz,  $\text{CDCl}_3$ )  $\delta$ : 152.4, 138.2, 134.4, 129.2, 128.0, 96.0, 74.0, 53.9, 30.3, 28.9, 27.0, 26.5, 25.0, 24.1; IR (neat,  $\text{cm}^{-1}$ ): 3339, 2952, 2360, 1743, 1500, 1455, 1363, 1226, 1106, 827, 734; HRMS-ESI<sup>+</sup> ( $m/z$ ): Calcd. for  $\text{C}_{21}\text{H}_{34}\text{Cl}_3\text{NO}_2\text{Si}$  [ $\text{M}+\text{Na}$ ]<sup>+</sup> 488.1322; found, 488.1318.

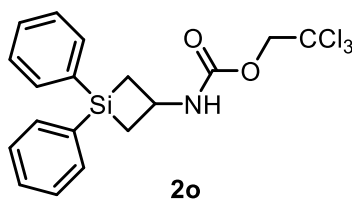

Following the general procedure for intermolecular amination, **1o**<sup>9</sup> (56.1 mg, 0.25 mmol, 5.0 equiv.), TrocNHOTs (18.1 mg, 0.05 mmol, 1.0 equiv.),  $\text{K}_2\text{CO}_3$  (10.4 mg, 0.075 mmol, 1.5 equiv.), and  $\text{Rh}_2(\text{tpa})_4$  (3.4 mg, 0.0025 mmol, 0.05 equiv.) were stirred at 20 °C in PhCl (0.5 mL) for 12 h. The crude material was purified by preparative thin-layer chromatography purification (hexane/EtOAc = 10/1) to afford **2o** (12.0 mg, 58%) as a colorless oil

Analytical data:  $^1\text{H}$  NMR (400 MHz,  $\text{C}_6\text{D}_6$ , 343K)  $\delta$ : 7.49–7.45 (m, 4H), 7.19–7.14 (m, 6H), 4.64 (s, 2H), 4.57 (br s, 1H), 4.27 (m, 1H), 1.90 (ddd,  $J = 11.9, 7.8, 2.4$  Hz), 1.27 (ddd,  $J = 11.9, 10.1, 2.8$  Hz);  $^{13}\text{C}$  NMR (100 MHz,  $\text{CDCl}_3$ )  $\delta$ : 153.3, 135.1, 134.8, 134.6, 133.1, 130.4, 128.3, 95.8, 74.5, 45.7, 24.3; IR (neat,  $\text{cm}^{-1}$ ): 3407, 3330, 3068, 2978, 1716, 1513, 1428, 1389, 1321, 1240, 1183, 1064,

1027, 941, 840, 734, 700, 585, 496, 468; **HRMS-ESI**<sup>+</sup> (*m/z*): Calcd. for C<sub>18</sub>H<sub>18</sub>Cl<sub>3</sub>NO<sub>2</sub>Si [M+Na]<sup>+</sup> 438.0038; found, 437.9991.

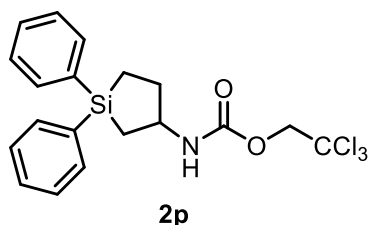

Following the general procedure for intermolecular amination, **1p** (23.8 mg, 0.10 mmol, 2.0 equiv.), TrocNHOTs (18.1 mg, 0.05 mmol, 1.0 equiv.), K<sub>2</sub>CO<sub>3</sub> (13.8 mg, 0.10 mmol, 2.0 equiv.), and Rh<sub>2</sub>(tpa)<sub>4</sub> (3.4 mg, 0.0025 mmol, 0.05 equiv.) were stirred at 20 °C in PhCl (0.25 mL) for 12 h. The crude material was purified by preparative thin-layer chromatography purification (CHCl<sub>3</sub>/hexane = 2/1) to afford **2p** (18.8 mg, 88%) as a colorless oil.

Analytical data: <sup>1</sup>H NMR (400 MHz, CDCl<sub>3</sub>, 313K) δ: 7.57-7.51 (m, 4H), 7.45-7.34 (m, 6H), 4.96 (br, 1H), 4.73 (s, 2H), 4.11-3.99 (m, 1H), 2.41-2.32 (m, 1H), 1.83-1.74 (m, 1H), 1.69-1.57 (m, 1H), 1.41-1.33 (m, 1H), 1.20-1.10 (m, 1H), 1.09-1.02 (m, 1H); <sup>13</sup>C NMR (100 MHz, CDCl<sub>3</sub>) δ: 153.9, 135.5, 135.3, 134.8, 129.9, 128.3, 128.2, 95.8, 74.5, 54.1, 33.8, 20.3, 9.7; **IR** (neat, cm<sup>-1</sup>): 3327, 3052, 2949, 1718, 1519, 1125, 722; **HRMS-ESI**<sup>+</sup> (*m/z*): Calcd. for C<sub>19</sub>H<sub>20</sub>Cl<sub>3</sub>NO<sub>2</sub>Si [M+Na]<sup>+</sup> 450.0221; found, 450.0221.

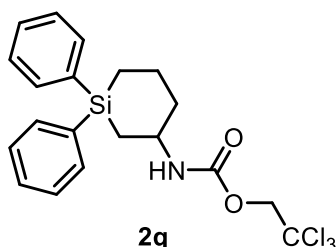

Following the general procedure for intermolecular amination, **1q**<sup>10</sup> (25.2 mg, 0.10 mmol, 2.0 equiv.), TrocNHOTs (18.1 mg, 0.05 mmol, 1.0 equiv.), K<sub>2</sub>CO<sub>3</sub> (13.8 mg, 0.10 mmol, 2.0 equiv.), and Rh<sub>2</sub>(tpa)<sub>4</sub> (3.4 mg, 0.0025 mmol, 0.05 equiv.) were stirred at 20 °C in PhCl (0.25 mL) for 12 h. The crude material was purified by preparative thin-layer chromatography purification (CHCl<sub>3</sub>/hexane = 2/1) to afford a mixture of β-aminated and γ-aminated products (19.8 mg, 89%, β/γ = 25/1). The β-aminated product **2q** was isolated by preparative HPLC (AcOEt/Hexane = 15/85).

Analytical data: <sup>1</sup>H NMR (400 MHz, CDCl<sub>3</sub>, 313K) δ: 7.66-7.60 (m, 2H), 7.48-7.30 (m, 8H), 4.92 (br, 1H), 4.71 (s, 2H), 3.89-3.78 (m, 1H), 2.15-2.03 (m, 2H), 1.88 (m, 1H), 1.68-1.56 (m, 1H), 1.41-1.31 (m, 2H), 1.09-0.92 (m, 2H); <sup>13</sup>C NMR (150 MHz, CDCl<sub>3</sub>) δ: 153.4, 136.3, 134.8, 134.4, 134.1, 129.8, 129.7, 128.4, 128.2, 95.9, 74.5, 50.5, 36.5, 21.7, 20.2, 10.4; **IR** (neat, cm<sup>-1</sup>): 3335, 3064, 2921,

1718, 1503, 1117, 703; **HRMS-ESI<sup>+</sup>** (*m/z*): Calcd. for C<sub>20</sub>H<sub>22</sub>Cl<sub>3</sub>NO<sub>2</sub>Si [M+Na]<sup>+</sup> 464.0378; found, 464.0385.

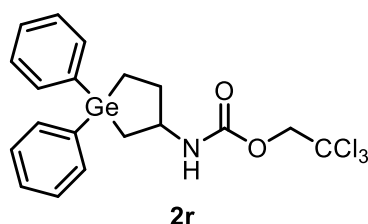

Following the general procedure for intermolecular amination, **1r** (28.8 mg, 0.10 mmol, 2.0 equiv.), TrocNHOTs (18.1 mg, 0.05 mmol, 1.0 equiv.), K<sub>2</sub>CO<sub>3</sub> (13.8 mg, 0.10 mmol, 2.0 equiv.), and Rh<sub>2</sub>(tpa)<sub>4</sub> (3.4 mg, 0.0025 mmol, 0.05 equiv.) were stirred at 20 °C in PhCl (0.25 mL) for 12 h. The crude material was purified by preparative thin-layer chromatography purification (CHCl<sub>3</sub>/hexane = 2/1) to afford **2r** (16.7 mg, 71%) as a colorless oil.

Analytical data: **<sup>1</sup>H NMR** (400 MHz, CDCl<sub>3</sub>, 313K) δ: 7.53-7.48 (m, 4H), 7.42-7.35 (m, 6H), 4.93 (br, 1H), 4.73 (s, 2H), 4.09-4.02 (m, 1H), 2.38-2.32 (m, 1H), 1.87-1.80 (m, 1H), 1.70-1.62 (m, 1H), 1.53-1.47 (m, 1H), 1.33-1.24 (m, 1H) 1.13 (dd, *J* = 8.8, 6.4 Hz); **<sup>13</sup>C NMR** (150 MHz, CDCl<sub>3</sub>) δ: 153.9, 137.4, 137.2, 134.2, 129.3, 129.0, 128.6, 128.5, 95.8, 74.5, 54.9, 34.5, 20.5, 11.0; **IR** (neat, cm<sup>-1</sup>): 3407, 3319, 2917, 1726, 1503, 1225, 1120, 801, 739, 699; **HRMS-ESI<sup>+</sup>** (*m/z*): Calcd. for C<sub>19</sub>H<sub>20</sub>Cl<sub>3</sub>NO<sub>2</sub>Ge [M+Na]<sup>+</sup> 491.9694; found, 491.9645.

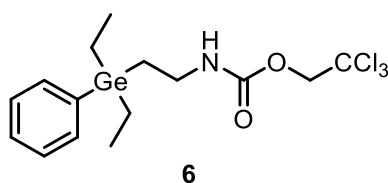

Following the general procedure for intermolecular amination, **5** (118 mg, 0.50 mmol, 10 equiv.), TrocNHOTs (18.1 mg, 0.05 mmol, 1.0 equiv.), K<sub>2</sub>CO<sub>3</sub> (10.4 mg, 0.075 mmol, 1.5 equiv.), and Rh<sub>2</sub>(tpa)<sub>4</sub> (3.4 mg, 0.0025 mmol, 0.05 equiv.) were stirred at 20 °C in PhCl (0.5 mL) for 12 h. The crude material was purified by preparative thin-layer chromatography purification (CHCl<sub>3</sub>/hexane = 2/1) to afford **6** (9.8 mg, 46%) as a colorless oil.

Analytical data: **<sup>1</sup>H NMR** (400 MHz, CDCl<sub>3</sub>, 313K) δ: 7.44–7.42 (m, 2H), 7.38–7.32 (m, 3H), 4.87 (br s, 1H), 4.69 (s, 2H), 3.37–3.32 (m, 2H), 1.30–1.26 (m, 2H), 1.15–1.02 (m, 10H); **<sup>13</sup>C NMR** (100 MHz, CDCl<sub>3</sub>) δ: 154.3, 138.6, 133.9, 128.7, 128.3, 95.8, 74.5, 38.8, 13.6, 9.0, 4.7; **IR** (neat, cm<sup>-1</sup>): 2948, 2360, 1716, 1509, 1234, 1133, 1020, 813, 700; **HRMS-ESI<sup>+</sup>** (*m/z*): Calcd. for C<sub>15</sub>H<sub>22</sub>Cl<sub>3</sub>GeNO<sub>2</sub> [M+Na]<sup>+</sup> 449.9826; found, 449.9811.

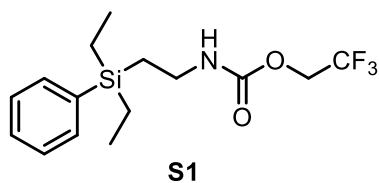

Following the general procedure for intermolecular amination, **1a** (96.2 mg, 0.50 mmol, 10 equiv.), CF<sub>3</sub>CH<sub>2</sub>OCONHOTs (15.7 mg, 0.05 mmol, 1.0 equiv.), K<sub>2</sub>CO<sub>3</sub> (10.4 mg, 0.075 mmol, 1.5 equiv.), and Rh<sub>2</sub>(tpa)<sub>4</sub> (3.4 mg, 0.0025 mmol, 0.05 equiv.) were stirred at 20 °C in PhCl (0.5 mL) for 12 h. The crude material was purified by preparative thin-layer chromatography purification (CHCl<sub>3</sub>/hexane = 2/1) to afford **S1** (3.0 mg, 24%) as a colorless oil.

Analytical data: <sup>1</sup>H NMR (400 MHz, CDCl<sub>3</sub>, 313K) δ: 7.51–7.46 (m, 2H), 7.39–7.33 (m, 3H), 4.77 (br s, 1H), 4.41 (q, *J* = 8.5 Hz, 2H), 3.29–3.24 (m, 2H), 1.16–1.10 (m, 2H), 1.03–0.99 (m, 6H), 0.88–0.82 (m, 4H); <sup>13</sup>C NMR (100 MHz, CDCl<sub>3</sub>) δ: 154.2, 136.1, 134.1, 129.4, 128.1, 123.3 (q, *J* = 275.8 Hz), 60.8 (q, *J* = 36.3 Hz), 37.9, 13.8, 7.4, 3.7; IR (neat, cm<sup>-1</sup>): 3328, 2954, 2360, 1716, 1508, 1365, 1284, 1232, 1164, 983, 700; HRMS-ESI<sup>+</sup> (*m/z*): Calcd. for C<sub>15</sub>H<sub>22</sub>F<sub>3</sub>NO<sub>2</sub>Si [M+Na]<sup>+</sup> 356.1270; found, 356.1263.

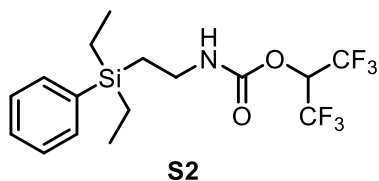

Following the general procedure for intermolecular amination, **1a** (96.2 mg, 0.50 mmol, 10 equiv.), (CF<sub>3</sub>)<sub>2</sub>CHOCONHOTs (19.1 mg, 0.05 mmol, 1.0 equiv.), K<sub>2</sub>CO<sub>3</sub> (10.4 mg, 0.075 mmol, 1.5 equiv.), and Rh<sub>2</sub>(tpa)<sub>4</sub> (3.4 mg, 0.0025 mmol, 0.05 equiv.) were stirred at 20 °C in PhCl (0.5 mL) for 12 h. The crude material was purified by preparative thin-layer chromatography purification (CHCl<sub>3</sub>/hexane = 1/1) to afford **S2** (2.4 mg, 12%) as a colorless oil.

Analytical data: <sup>1</sup>H NMR (400 MHz, CDCl<sub>3</sub>, 313K) δ: 7.49–7.47 (m, 2H), 7.40–7.34 (m, 3H), 5.65 (sep, *J* = 6.2 Hz, 2H), 4.92 (br s, 1H), 3.33–3.28 (m, 2H), 1.17–1.13 (m, 2H), 1.03–0.99 (m, 6H), 0.89–0.83 (m, 4H); <sup>13</sup>C NMR (100 MHz, CDCl<sub>3</sub>) δ: 152.2, 135.9, 134.1, 129.5, 128.2, 120.8 (q, *J* = 279.7 Hz), 67.6 (sep, *J* = 34.2 Hz), 38.4, 13.6, 7.4, 3.6; IR (neat, cm<sup>-1</sup>): 3332, 2969, 2360, 1739, 1508, 1375, 1230, 1190, 1108, 904, 721; HRMS-ESI<sup>+</sup> (*m/z*): Calcd. for C<sub>16</sub>H<sub>21</sub>F<sub>6</sub>NO<sub>2</sub>Si [M+Na]<sup>+</sup> 424.1143; found, 424.1143.

### Synthesis of substrates and characterization data of new compounds

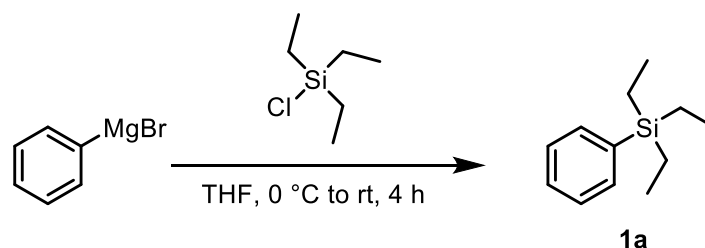

Following the literature procedure,<sup>11</sup> chlorotriethylsilane (240 mg, 1.59 mmol) and CuI (15 mg, 0.08 mmol) was placed in a 20-mL reaction flask under argon in THF (10 mL). The flask was cooled to 0 °C. Phenylmagnesium bromide (1.0 M THF solution, 3.2 mL, 3.2 mmol) was slowly introduced to the flask. The reaction mixture was stirred for 1 h at 0 °C. After being stirred for 3 h at rt, a saturated aqueous solution of NH<sub>4</sub>Cl was added. The organic compounds were extracted with ethyl acetate three times. The combined organic part was dried over Na<sub>2</sub>SO<sub>4</sub>, filtered and concentrated. The residue was chromatographed on silica gel (Hexane) to afford **1a** (270 mg, 88% yield) as a colorless oil. The spectral data of **1a** were identical to those reported.<sup>12</sup>

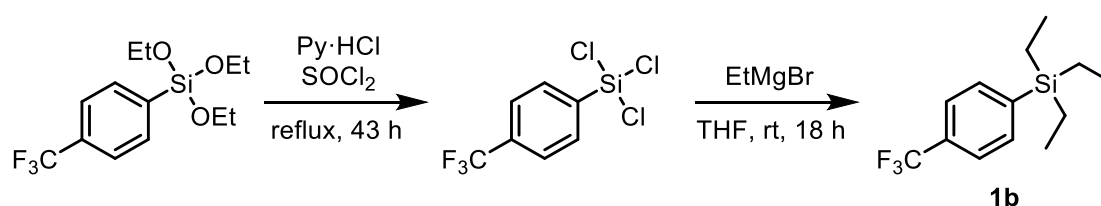

Following the literature procedure,<sup>13</sup> triethoxy(4-(trifluoromethyl)phenyl)silane (8.12 g, 26.3 mmol) was mixed with thionyl chloride (30 mL) and pyridinium hydrochloride (400 mg, 3.46 mmol), and the mixture was refluxed and stirred for 43 h. The excess thionyl chloride was removed under reduced the pressure, and the residue was dissolved in THF (130 mL) and cooled to 0 °C. Ethylmagnesium bromide (3.0 M in Et<sub>2</sub>O) was added slowly to the solution. After being stirred for 18 h at rt, the reaction was quenched by addition of 1N HCl. The resulting mixture was extracted with diethylether, the organic layer was washed with NaHCO<sub>3</sub> aq., brine, and dried over Na<sub>2</sub>SO<sub>4</sub>, filtered and concentrated. The residue was chromatographed on silica gel (Hexane) to afford **1b** (3.79 g, 55% yield) as a colorless oil. The spectral data of **1b** were identical to those reported.<sup>14</sup> **1b-d<sub>15</sub>** (1.67 g, 49%) was also synthesized by the same procedure using the deuterated Grignard reagent (C<sub>2</sub>D<sub>5</sub>MgBr)



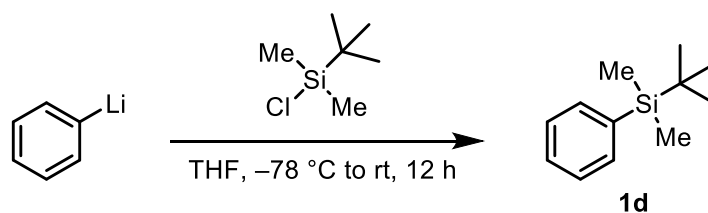

Following the literature procedure,<sup>15</sup> solution of phenyllithium in dibutyl ether (1.0 mL of 1.8 M solution, 1.80 mmol) was mixed with dry THF (5 mL) under N<sub>2</sub> and cooled to -78 °C. *tert*-Butyldimethylsilyl chloride (0.29 g, 1.89 mmol) was added slowly to this solution. After being stirred for 12 h at rt, the reaction was quenched by addition of water and extracted with diethylether. The organic layer was washed with water, and brine, and dried over Na<sub>2</sub>SO<sub>4</sub>, filtered, and concentrated. The residue was chromatographed on silica gel (hexane) to afford **1d** (280 mg, 82% yield) as a colorless oil.

Analytical data: <sup>1</sup>H NMR (400 MHz, CDCl<sub>3</sub>) δ: 7.54–7.50 (m, 2H), 7.38–7.32 (m, 3H), 0.88 (s, 9H), 0.28 (s, 6H); <sup>13</sup>C NMR (100 MHz, CDCl<sub>3</sub>) δ: 137.9, 134.6, 128.9, 127.6, 26.6, 17.0, -6.0; IR (neat, cm<sup>-1</sup>): 2925, 2854, 2360, 1461, 1247, 1105, 831, 769, 734, 700. HRMS-EI<sup>+</sup> (*m/z*): Calcd. for C<sub>12</sub>H<sub>20</sub>Si [M<sup>+</sup>] 192.1334; found, 192.1335.

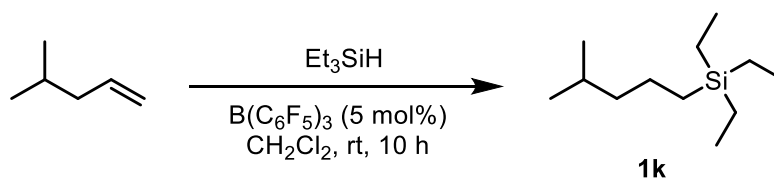

Following the literature procedure,<sup>6</sup> to a stirred solution of B(C<sub>6</sub>F<sub>5</sub>)<sub>3</sub> (26 mg, 5 mol%) in anhydrous CH<sub>2</sub>Cl<sub>2</sub> (1 mL) was added Et<sub>3</sub>SiH (0.19 mL, 1.2 mmol), followed by addition of 4-methyl-1-pentene (0.13 mL, 1.0 mmol). The reaction mixture was stirred at rt for 10 h. The mixture was filtered through a short column (silica gel, CH<sub>2</sub>Cl<sub>2</sub>) and concentrated. The residue was chromatographed on silica gel (hexane) to afford **1k** (240 mg, 67% yield) as a colorless oil.

Analytical data: <sup>1</sup>H NMR (400 MHz, CDCl<sub>3</sub>) δ: 1.61–1.48 (m, 1H), 1.32–1.24 (m, 2H), 1.22–1.16 (m, 2H), 0.95–0.90 (m, 9H), 0.86 (d, *J* = 6.6 Hz, 6H), 0.55–0.45 (m, 8H); <sup>13</sup>C NMR (100 MHz, CDCl<sub>3</sub>) δ: 43.6, 27.7, 22.8, 21.7, 11.6, 7.6, 3.5; IR (neat, cm<sup>-1</sup>): 2952, 2873, 1739, 1463, 1417, 1365, 1232, 1016, 906, 730.

HRMS-EI<sup>+</sup> (*m/z*): Calcd. for C<sub>12</sub>H<sub>28</sub>Si [M<sup>+</sup>] 200.1960; found, 200.1961.

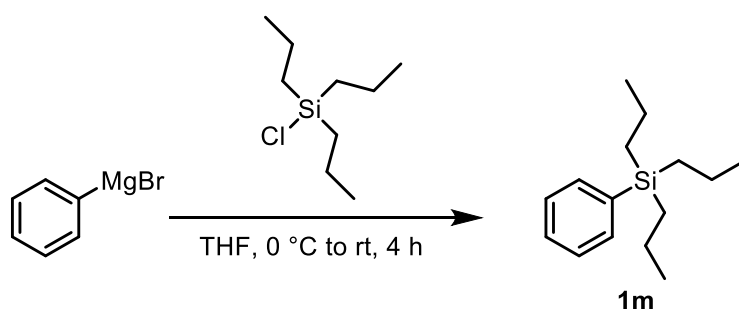

Following the literature procedure,<sup>11</sup> chlorotripropylsilane (307 mg, 1.59 mmol) and CuI (15 mg, 0.08 mmol) was placed in a 20-mL reaction flask under argon in THF (10 mL). The flask was cooled to 0 °C. Phenylmagnesium bromide (1.0 M THF solution, 3.2 mL, 3.2 mmol) was slowly introduced to the flask. The reaction mixture was stirred for 1 h at 0 °C. After being stirred for 3 h at rt, a saturated aqueous solution of NH<sub>4</sub>Cl was added. The organic compounds were extracted with ethyl acetate three times. The combined organic part was dried over Na<sub>2</sub>SO<sub>4</sub>, filtered and concentrated. The residue was chromatographed on silica gel (Hexane) to afford **1m** (350 mg, 94% yield) as a colorless oil. The spectral data of **1m** were identical to those reported.<sup>16</sup>

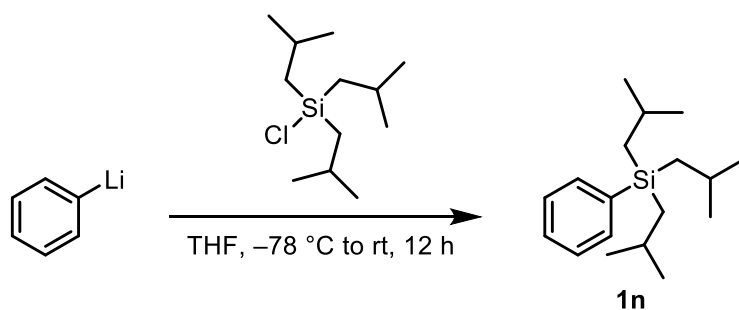

Following the literature procedure,<sup>15</sup> solution of phenyllithium in dibutyl ether (1.0 mL of 1.8 M solution, 1.80 mmol) was mixed with dry THF (5 mL) under N<sub>2</sub> and cooled to -78 °C. Triisobutylsilyl chloride (0.51 mL, 1.89 mmol) was added slowly to this solution. After being stirred for 12 h at rt, the reaction was quenched by addition of water and extracted with diethylether. The organic layer was washed with water, and brine, and dried over Na<sub>2</sub>SO<sub>4</sub>, filtered, and concentrated. The residue was chromatographed on silica gel (hexane) to afford **1n** (270 mg, 55% yield) as a colorless oil.

Analytical data: <sup>1</sup>H NMR (400 MHz, CDCl<sub>3</sub>) δ: 7.54–7.49 (m, 2H), 7.33–7.30 (m, 3H), 1.84–1.71 (m, 3H), 0.88 (d, *J* = 6.6 Hz, 18H), 0.85 (d, *J* = 6.8 Hz, 6H); <sup>13</sup>C NMR (100 MHz, CDCl<sub>3</sub>) δ: 139.4, 134.3, 128.6, 127.6, 26.7, 25.0, 24.3; IR (neat, cm<sup>-1</sup>): 2952, 2360, 1463, 1326, 1216, 1106, 1037, 906, 829, 732. HRMS-EI<sup>+</sup> (*m/z*): Calcd. for C<sub>18</sub>H<sub>32</sub>Si [M<sup>+</sup>] 276.2273; found, 276.2272.

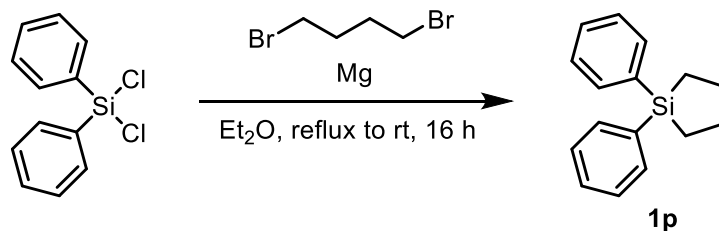

Following the literature procedure,<sup>17</sup> a portion of 1 mL of a solution of 1,4-dibromobutane (1.54 mL, 13 mmol) in diethyl ether (5 mL) was added to a stirred suspension of magnesium turnings (729 mg, 30 mmol) in diethyl ether (5 mL), and the reaction was started by gentle heating. Subsequently, the remaining 1,4-dibromobutane solution was added within 2 h, causing the mixture to boil under reflux. After the addition was complete, the mixture was heated under reflux for a further 90 min and then cooled to 20 °C within 1 h. The resulting two-phase Grignard reagent was added dropwise within 2 h to a solution of dichlorodiphenylsilane (2.08 mL, 10 mmol) in diethyl ether (5 mL), causing the mixture to boil under reflux. The reaction mixture was stirred at 20 °C for 16 h and acidified with 1N HCl. The resulting mixture was extracted with diethylether, the organic layer was washed with NaHCO<sub>3</sub> aq., brine, and dried over Na<sub>2</sub>SO<sub>4</sub>, filtered and concentrated. The residue was chromatographed on silica gel (Hexane) to afford **1p** (1.37 g, 57% yield) as a colorless oil.

Analytical data: <sup>1</sup>H NMR (400 MHz, CDCl<sub>3</sub>) δ: 7.59-7.55 (m, 4H), 7.42-7.35 (m, 6H), 1.85-1.80 (m, 4H), 1.17-1.11 (m, 4H); <sup>13</sup>C NMR (100 MHz, CDCl<sub>3</sub>) δ: 137.1, 134.9, 129.3, 128.0, 27.9, 12.3; IR (neat, cm<sup>-1</sup>): 3066, 2933, 1427, 1109, 694. HRMS-EI<sup>+</sup> (*m/z*): Calcd. for C<sub>18</sub>H<sub>32</sub>Si [M<sup>+</sup>] 238.1178; found, 238.1175.

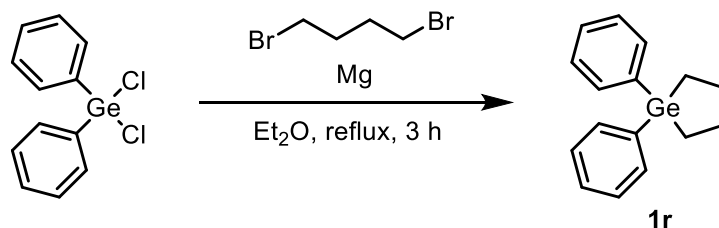

Following the literature procedure,<sup>17</sup> a portion of 0.2 mL of a solution of 1,4-dibromobutane (0.23 mL, 1.95 mmol) in diethyl ether (1 mL) was added to a stirred suspension of magnesium turnings (109 mg, 4.5 mmol) in diethyl ether (1 mL), and the reaction was started by gentle heating. Subsequently, the remaining 1,4-dibromobutane solution was added within 2 h, causing the mixture to boil under reflux. After the addition was complete, the mixture was heated under reflux for a further 90 min and then cooled to 20 °C within 1 h. The resulting two-phase Grignard reagent was added dropwise within 2 h to a solution of dichlorodiphenylgermane (0.31 mL, 1.5 mmol) in diethyl ether (1 mL), causing the mixture to boil under reflux. The reaction mixture was stirred under reflux

for 1 h and acidified with 1N HCl. The resulting mixture was extracted with diethylether, the organic layer was washed with NaHCO<sub>3</sub> aq., brine, and dried over Na<sub>2</sub>SO<sub>4</sub>, filtered and concentrated. The residue was chromatographed on silica gel (Hexane) to afford **1r** (184 mg, 43% yield) as a colorless oil.

Analytical data: <sup>1</sup>H NMR (400 MHz, CDCl<sub>3</sub>) δ: 7.56-7.50 (m, 4H), 7.40-7.33 (m, 6H), 1.88-1.77 (m, 4H), 1.29-1.20 (m, 4H); <sup>13</sup>C NMR (100 MHz, CDCl<sub>3</sub>) δ: 138.9, 134.4, 128.8, 128.3, 28.8, 13.5; IR (neat, cm<sup>-1</sup>): 3064, 2924, 2850, 1429, 1092, 776, 697, 583, 461. HRMS-EI<sup>+</sup> (*m/z*): Calcd. for C<sub>18</sub>H<sub>32</sub>Ge [M<sup>+</sup>] 284.0623; found, 284.0619.

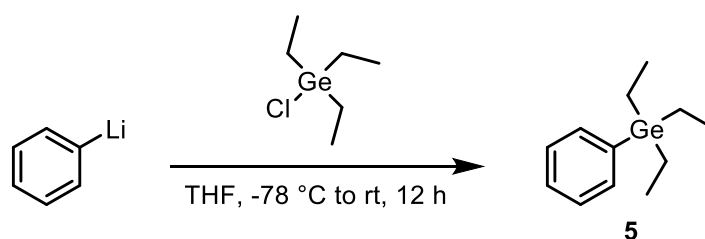

A solution of phenyllithium in dibutyl ether (2.0 mL of 1.8 M solution, 3.60 mmol) was mixed with dry THF (10 mL) under N<sub>2</sub> and cooled to -78 °C. Chlorotriethylgermane (0.64 mL, 3.78 mmol) was added slowly to this solution. After being stirred for 12 h at rt, the reaction was quenched by addition of water and extracted with diethylether. The organic layer was washed with water, and brine, and dried over Na<sub>2</sub>SO<sub>4</sub>, filtered, and concentrated. The residue was chromatographed on silica gel (hexane) to afford **5** (600 mg, 70% yield) as a colorless oil. The spectral data of **5** were identical to those reported.<sup>18</sup>

## KIE measurement

### Parallel KIE

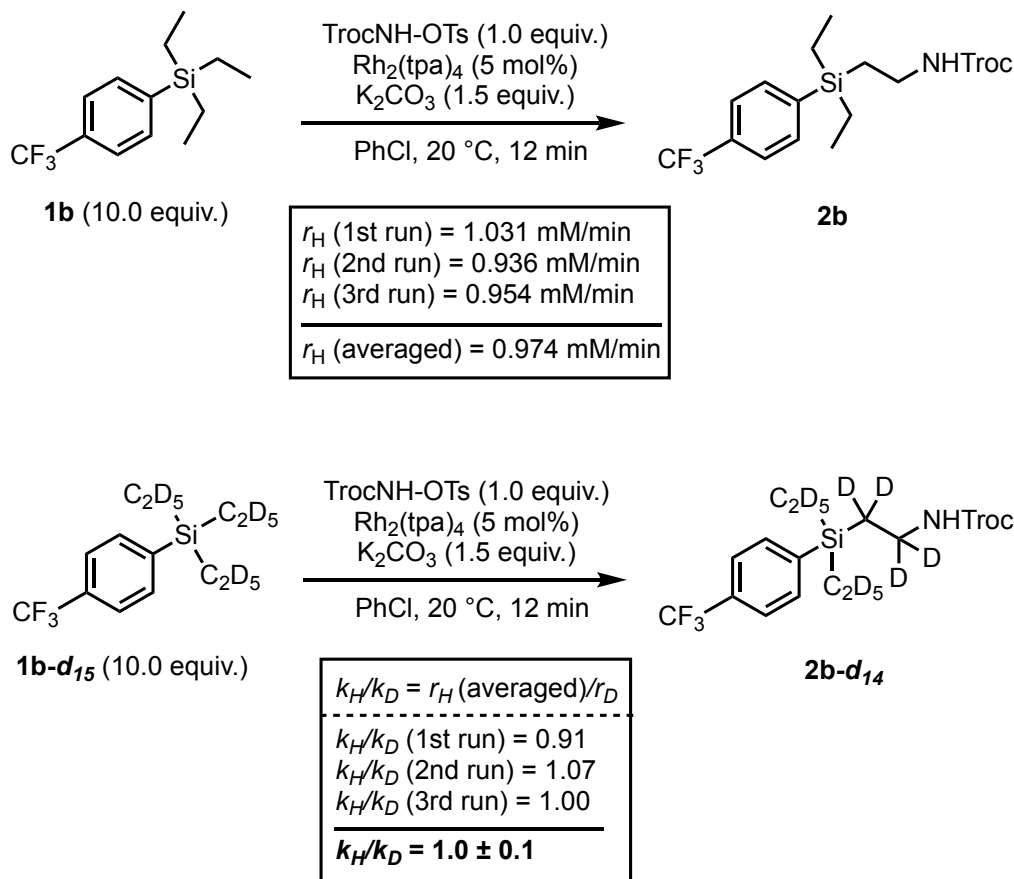

**Scheme S1.** Determination of intermolecular KIE via initial rate ( $r_H$  and  $r_D$ ) analysis. (a) Determination of  $r_H$  (averaged) by three times experiments. See also Figure S1. (b) Determination of  $k_H/k_D$  by using  $r_D$  (1<sup>st</sup>-3<sup>rd</sup> run) and  $r_H$  (averaged). See also Figure S2.

To a suspension of **1b** or **1b-d<sub>15</sub>** (1.0 mmol, 10.0 equiv.), TrocNHOTs (36.3 mg, 0.10 mmol, 1.0 equiv.) and K<sub>2</sub>CO<sub>3</sub> (20.7 mg, 0.15 mmol, 1.5 equiv.) in PhCl (1.0 mL) was added Rh<sub>2</sub>(tpa)<sub>4</sub> (6.8 mg, 0.0050 mmol, 0.05 equiv.) at 20 °C. Aliquots (50 μL) were taken every 2 minutes from the reaction flask for 12 minutes, and filtered through a short silica pad with 1 mL of CDCl<sub>3</sub> for <sup>19</sup>F NMR analysis. The yield was determined from the comparison of the integrals of the product peaks relative to the 4-bromobenzofluoride internal standard. The experiments were performed three times for each substrate (Figure S1 and S2). The averaged  $r_H$  was calculated by the three runs shown in Figure S1. The  $k_H/k_D$  value ( $k_H/k_D = 1.0 \pm 0.1$ ) was determined by using the averaged  $r_H$  and  $r_D$  (1<sup>st</sup>-3<sup>rd</sup> runs) shown in Figure S2.

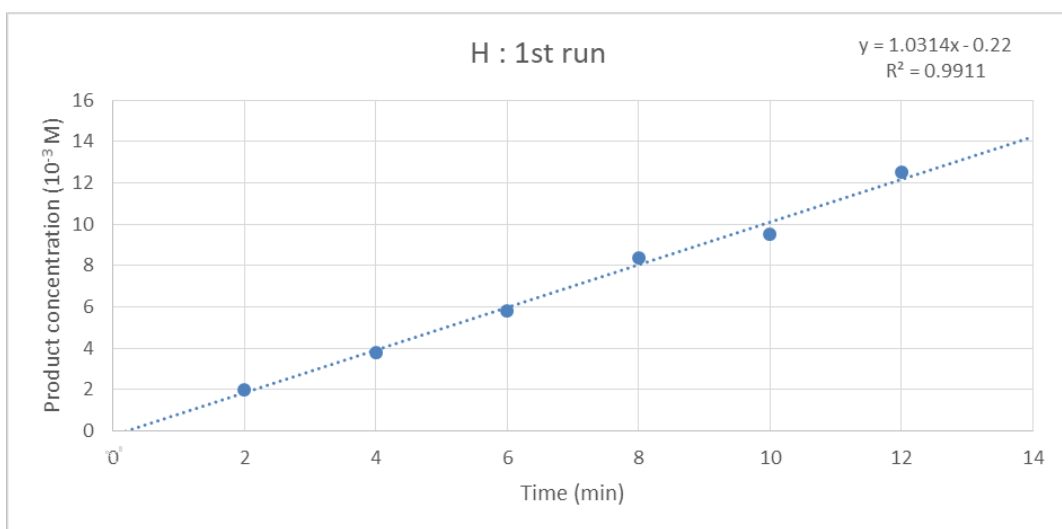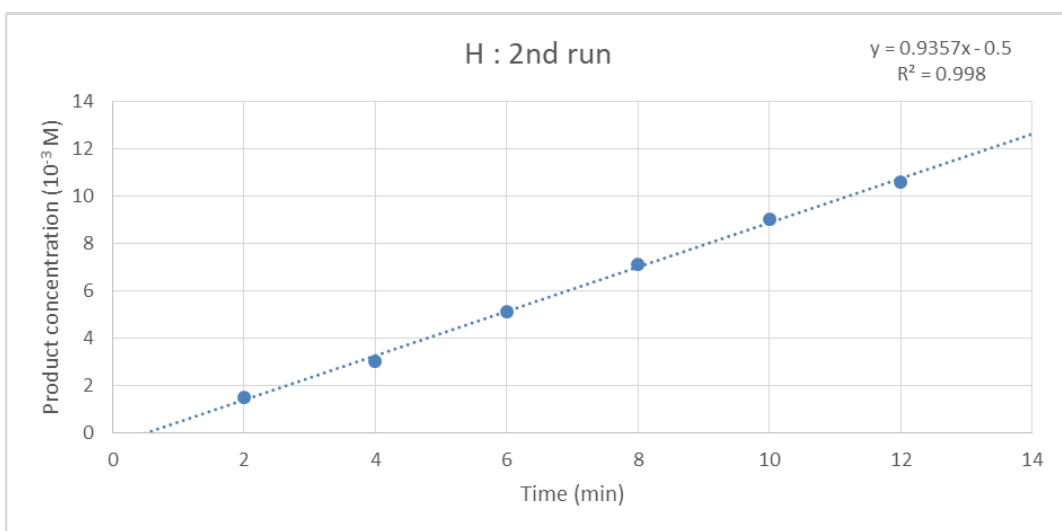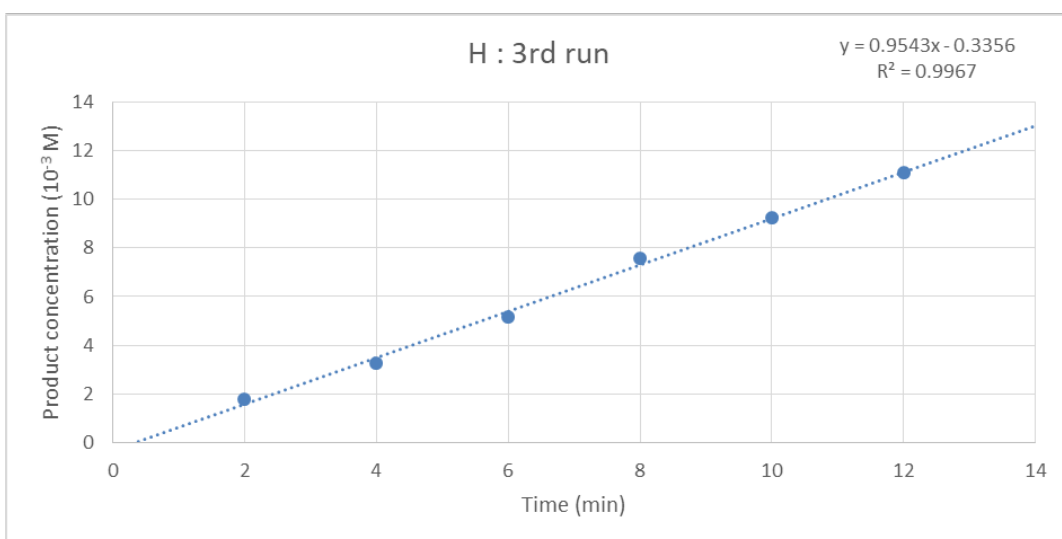

Figure S1. Initial rate analysis for C-H amination of 1b

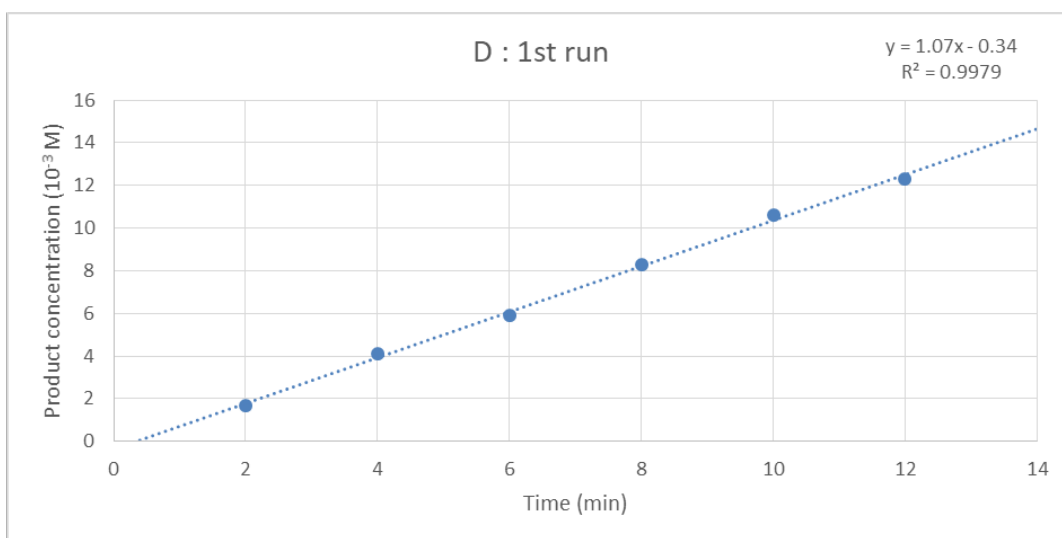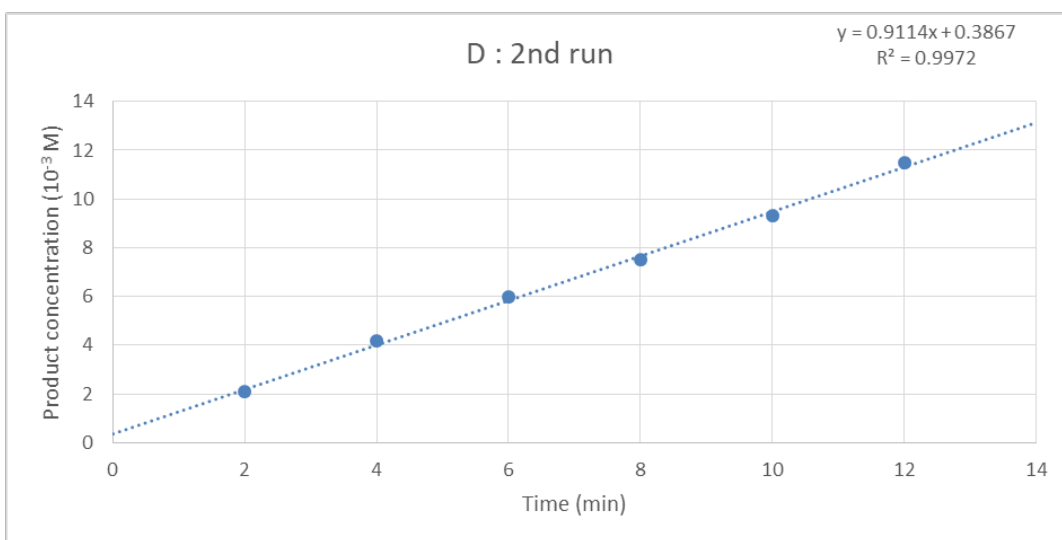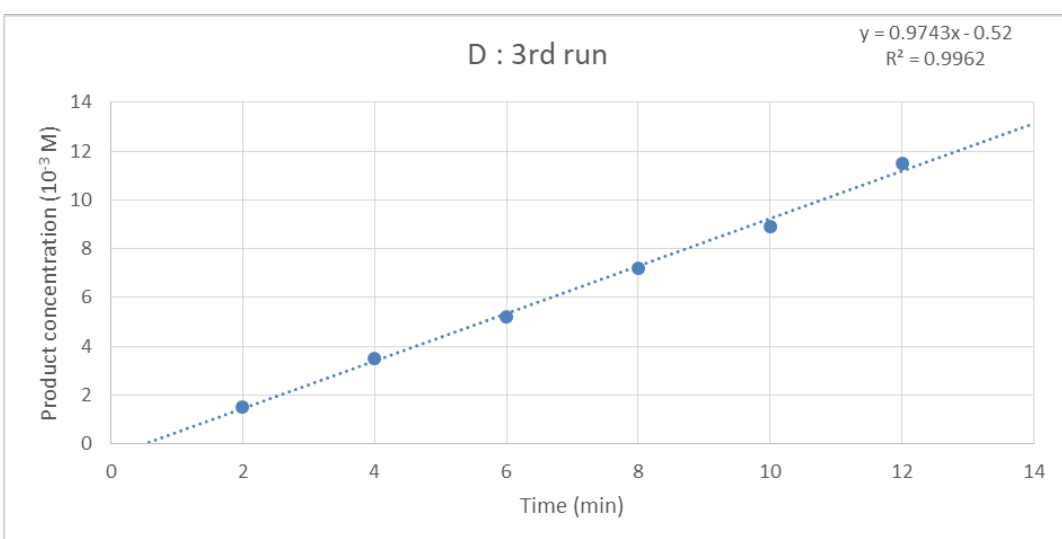

Figure S2. Initial rate analysis for C-H amination of **1b-d<sub>15</sub>**

### Competitive KIE

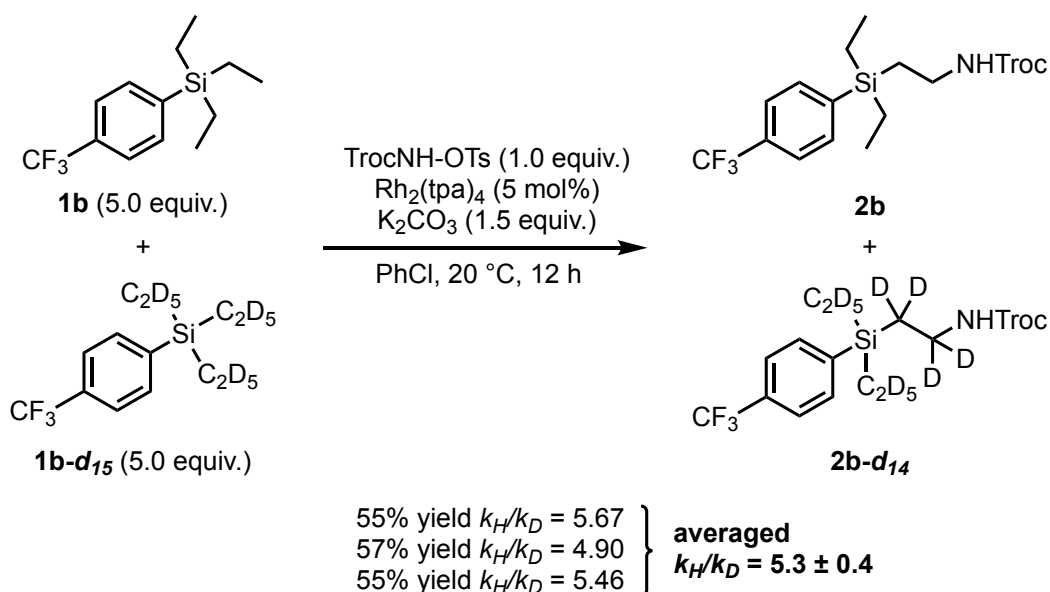

**Scheme S2.** Inter-molecular competitive KIE experiments.

To a suspension of **1b** (65.1 mg, 0.25 mmol, 5.0 equiv.), **1b-d<sub>15</sub>** (68.9 mg, 0.25 mmol, 5.0 equiv.), TrocNHOTs (18.1 mg, 0.05 mmol, 1.0 equiv.) and K<sub>2</sub>CO<sub>3</sub> (10.4 mg, 0.075 mmol, 1.5 equiv.) in PhCl (0.5 mL) was added Rh<sub>2</sub>(tpa)<sub>4</sub> (3.4 mg, 0.0025 mmol, 0.05 equiv.) at 20 °C. After being stirred for 12 h at 20 °C, the reaction was quenched by addition of water and extracted with CHCl<sub>3</sub>. The organic layer was washed with brine, and dried over Na<sub>2</sub>SO<sub>4</sub>, filtered, and concentrated *in vacuo*. The residue was purified by preparative thin-layer chromatography purification (CHCl<sub>3</sub>/hexane = 2/1) to afford a mixture of **2b** and **2b-d<sub>14</sub>**. KIE was calculated from the comparison of the integrals between a nitrogen  $\alpha$  signal ( $\delta$  3.42–3.25 ppm, 2H of **2b**) and a trichloroethyl signal ( $\delta$  4.69 ppm, 2H of **2b** and **2b-d<sub>14</sub>**) in <sup>1</sup>H NMR of a solution of **2b** and **2b-d<sub>14</sub>** (CDCl<sub>3</sub>). The experiments were performed three times and the determined KIE was the average of three runs.



### Computational details

All calculation reported in the present study were carried out using density functional theory (DFT) with (U)M06<sup>19</sup> or B3PW91 functional, as implemented in the Gaussian 09 (Revision E.01)<sup>20</sup>. For geometry optimizations, the 6-31G(d,p) basis set was used for the H, C, N, O, Si, Cl elements, and the LANL2DZ<sup>21</sup> basis set and pseudopotential for Rh. Based on these optimized geometries, single-point energy calculations were performed using the 6-311++G(2d,2p) basis set for the H, C, N, O, Si, Cl elements, and the SDD<sup>22</sup> basis set and pseudopotential for Rh with solvents effects simulated by SMD<sup>23</sup> solvent model (chlorobenzene). The stationary points were confirmed as minima (no imaginary frequencies) or transition state (only one imaginary frequency) by analytical frequency calculations as the same theory level as the geometry optimizations. Computational time was generously provided by the Supercomputer Laboratory in the Institute for Chemical Research of Kyoto University.

### Highest occupied molecular orbital of diphenylsilacyclopentane **1p**

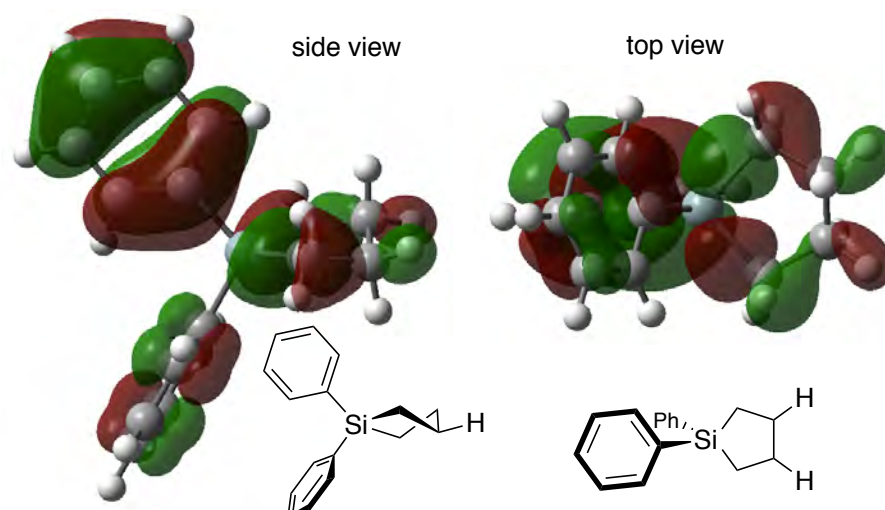

**Figure S3.** HOMO of **1p** calculated by DFT at the B3PW91/6-31g(d,p) level of theory.

### XYZ coordinates and thermochemical data (energies in Hartree)

Temperature = 298.15 K, Pressure = 1.00 atm

#### Diphenylsilacyclopentane (**1p**)

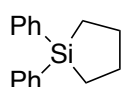

#### B3PW91/6-31G(d,p)

Electronic Energy = -909.813987997    Electronic and Zero-Point Energy = -909.518600

Enthalpy = -909.502000    Free Energy = -909.563908

|    |             |             |             |
|----|-------------|-------------|-------------|
| C  | -0.19495200 | 2.02239100  | 1.40964000  |
| C  | 0.06125200  | 3.36645900  | 0.69740200  |
| C  | -0.60263000 | 3.32219000  | -0.68807900 |
| C  | -0.17022400 | 2.02516500  | -1.40497500 |
| H  | 0.49808600  | 1.85200100  | 2.23938900  |
| H  | -1.20698800 | 2.00354800  | 1.83415900  |
| H  | 1.14259200  | 3.51017000  | 0.56805100  |
| H  | -0.29945000 | 4.21909900  | 1.28587100  |
| H  | -1.69410400 | 3.32451300  | -0.56007400 |
| H  | -0.35893800 | 4.21564800  | -1.27600100 |
| H  | -0.85062500 | 1.74932000  | -2.21608800 |
| H  | 0.82409000  | 2.16039200  | -1.84935600 |
| Si | -0.06768400 | 0.74286200  | 0.00365800  |
| C  | -1.50179800 | -0.48854900 | 0.00331500  |
| C  | -1.29694500 | -1.86863400 | -0.15116600 |
| C  | -2.82675600 | -0.03743200 | 0.13677500  |
| C  | -2.36813700 | -2.76133100 | -0.17313100 |
| H  | -0.28483400 | -2.25246600 | -0.25297400 |
| C  | -3.90087200 | -0.92355300 | 0.11468800  |
| H  | -3.02867700 | 1.02489400  | 0.26141600  |
| C  | -3.67246600 | -2.29051400 | -0.04055500 |
| H  | -2.18310100 | -3.82570500 | -0.29265600 |
| H  | -4.91587300 | -0.54925400 | 0.22011400  |
| H  | -4.50841500 | -2.98477100 | -0.05663300 |
| C  | 1.56872400  | -0.19929100 | 0.00597900  |
| C  | 2.28794100  | -0.42664500 | -1.17874400 |
| C  | 2.10282400  | -0.71361700 | 1.19981800  |
| C  | 3.48920500  | -1.13420500 | -1.17414000 |
| H  | 1.90735500  | -0.04460800 | -2.12350200 |
| C  | 3.30344700  | -1.42080900 | 1.21233800  |
| H  | 1.57411900  | -0.55936300 | 2.13822600  |
| C  | 3.99981800  | -1.63179400 | 0.02315000  |
| H  | 4.02745200  | -1.29539400 | -2.10450900 |
| H  | 3.69687400  | -1.80592500 | 2.14943000  |
| H  | 4.93743400  | -2.18113800 | 0.03003900  |

Mechanism of C-H amination of dimethylsilacyclopentane mediated by dirhodium nitrene

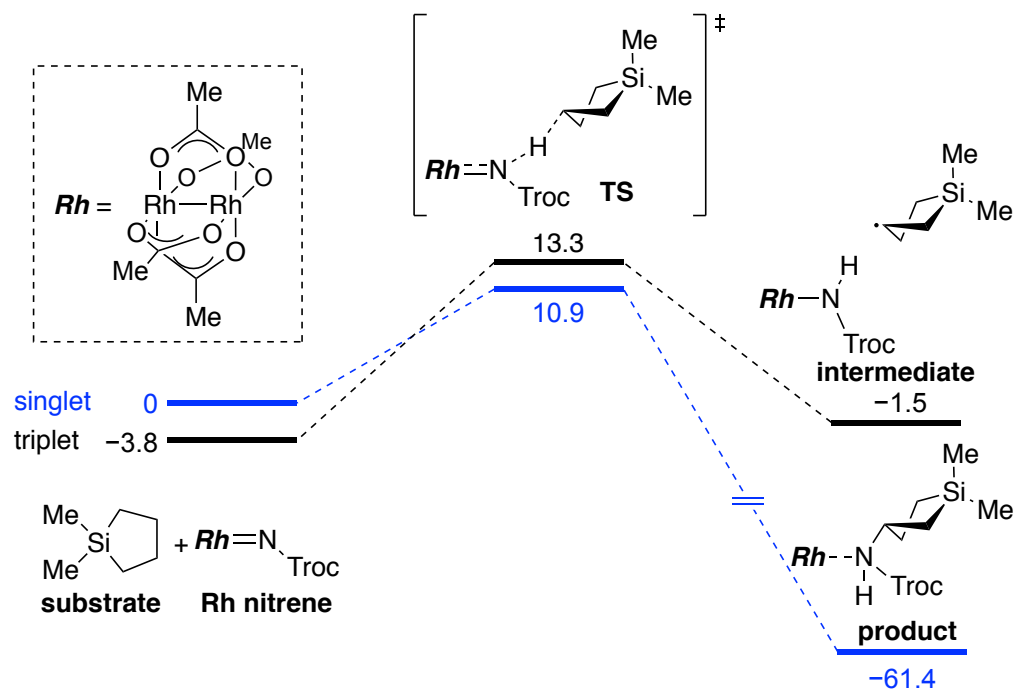

Figure S4. Energy diagram for C-H insertion step of silacyclopentane. (U)M06 functional were used.

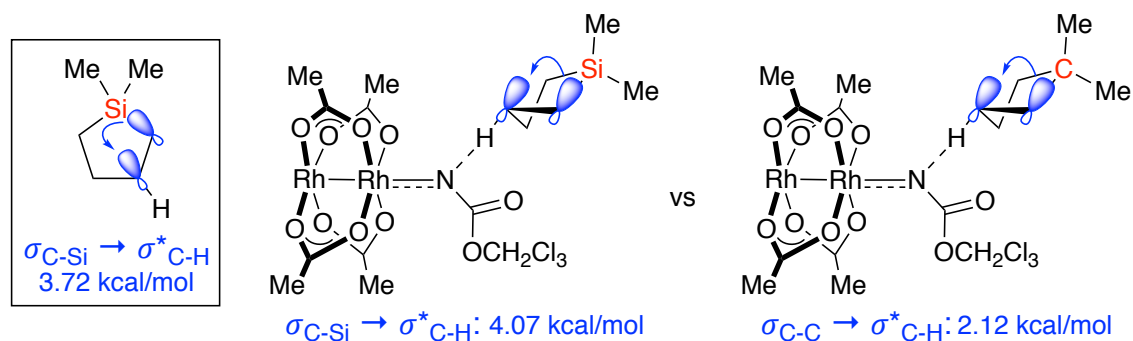

Figure S5. Natural bond orbital (NBO) analysis of the substrate and TS structures.

XYZ coordinates and thermochemical data (energies in Hartree)

Temperature = 298.15 K, Pressure = 1.00 atm

substrate (1,1-dimethylsilacyclopentane)

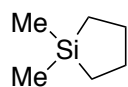

M06/6-31G(d,p)

Electronic Energy = -526.384354413

Electronic and Zero-Point Energy = -526.1994434

Enthalpy = -526.1887754

Free Energy = -526.2335804

M06/6-311++G(2d,2p)

Electronic Energy = -526.473103

|    |             |             |             |
|----|-------------|-------------|-------------|
| C  | -0.61013200 | -0.53690400 | -1.29524300 |
| C  | -1.91745800 | -0.58755600 | -0.49029600 |
| C  | -1.91743100 | 0.58755600  | 0.49040800  |
| C  | -0.61005600 | 0.53690800  | 1.29527800  |
| H  | -0.38487600 | -1.48558400 | -1.79536000 |
| H  | -0.68267900 | 0.23166900  | -2.07876100 |
| H  | -1.95549200 | -1.52577400 | 0.08722700  |
| H  | -2.80831100 | -0.58125000 | -1.13243000 |
| H  | -1.95550100 | 1.52577400  | -0.08711200 |
| H  | -2.80824600 | 0.58124800  | 1.13259400  |
| H  | -0.38477200 | 1.48558900  | 1.79537900  |
| H  | -0.68255600 | -0.23166300 | 2.07880300  |
| Si | 0.67295100  | 0.00000000  | -0.00001900 |
| C  | 1.73709800  | -1.42865800 | 0.60467500  |
| H  | 2.42827400  | -1.77921100 | -0.17004800 |
| H  | 2.33211300  | -1.14345300 | 1.47990200  |
| H  | 1.10296000  | -2.27537800 | 0.89571100  |
| C  | 1.73706800  | 1.42865400  | -0.60477600 |
| H  | 2.42828300  | 1.77921400  | 0.16991000  |
| H  | 2.33203800  | 1.14344400  | -1.48003200 |
| H  | 1.10291400  | 2.27537100  | -0.89578600 |

**substrate (1,1-dimethylcyclopentane)**

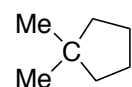

M06/6-31G(d,p)

Electronic Energy = -274.974048652

Electronic and Zero-Point Energy = -274.777917

Enthalpy = -274.769414

Free Energy = -274.808820

M06/6-311++G(2d,2p)

Electronic Energy = -275.045048687

|   |             |             |             |
|---|-------------|-------------|-------------|
| C | -1.65259300 | -0.77409200 | -0.00868800 |
| C | -0.22934400 | -1.18397500 | -0.40942000 |
| C | 0.66089800  | 0.00000100  | -0.01004300 |
| C | -0.22934600 | 1.18397400  | -0.40942800 |
| C | -1.65259600 | 0.77408800  | -0.00869500 |
| H | -2.40141400 | -1.18992600 | -0.69161000 |
| H | -1.90105000 | -1.15950100 | 0.98796900  |
| H | -0.16677300 | -1.31644900 | -1.50022400 |
| H | 0.09733000  | -2.12818700 | 0.04717000  |
| H | 0.09732700  | 2.12818700  | 0.04716100  |
| H | -0.16677600 | 1.31645100  | -1.50023200 |
| H | -1.90104900 | 1.15950400  | 0.98796000  |
| H | -2.40141800 | 1.18991600  | -0.69161900 |
| C | 0.90856300  | 0.00000700  | 1.49734400  |
| H | 1.48168400  | -0.88691800 | 1.79832500  |
| H | 1.48166000  | 0.88694600  | 1.79832300  |
| H | -0.02706900 | -0.00000500 | 2.06932900  |
| C | 1.99226700  | -0.00000300 | -0.74326000 |
| H | 2.58721000  | 0.88594800  | -0.48400100 |
| H | 2.58720200  | -0.88596300 | -0.48400800 |
| H | 1.84604400  | 0.00000000  | -1.83139800 |

**Rh nitrene (singlet state)**

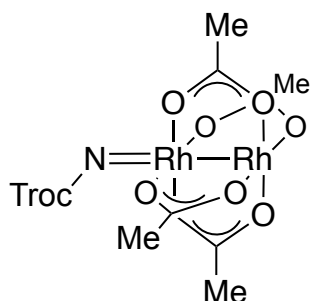

M06/6-31G(d,p)[LANL2DZ]

Electronic Energy = -2833.52349

Electronic and Zero-Point Energy = -2833.255374

Enthalpy = -2833.227067

Free Energy = -2833.314106

M06/6-311++G(2d,2p)[SDD]

Electronic Energy = -2836.132154

|    |              |              |              |
|----|--------------|--------------|--------------|
| Rh | 0.000002686  | 0.000002787  | 0.000005616  |
| Rh | -0.000001629 | 0.000000304  | 0.000001338  |
| O  | 0.000001324  | -0.000000116 | -0.000000784 |
| O  | 0.000005401  | 0.000002126  | 0.000003282  |
| O  | -0.000000428 | 0.000003479  | 0.000008449  |
| O  | -0.000004407 | 0.000001220  | 0.000004412  |
| O  | 0.000001738  | -0.000000297 | -0.000001301 |
| O  | 0.000005779  | 0.000001948  | 0.000002760  |
| O  | -0.000000341 | 0.000003156  | 0.000007694  |
| O  | -0.000004469 | 0.000000874  | 0.000003605  |
| C  | 0.000004147  | 0.000000892  | 0.000000698  |
| C  | 0.000006266  | 0.000000462  | -0.000000990 |
| H  | 0.000004421  | -0.000000186 | -0.000001969 |
| H  | 0.000007927  | -0.000000157 | -0.000003078 |
| H  | 0.000008007  | 0.000001468  | 0.000000809  |
| C  | -0.000003264 | 0.000002601  | 0.000007289  |
| C  | -0.000005475 | 0.000003139  | 0.000009315  |
| H  | -0.000008350 | 0.000002680  | 0.000009209  |
| H  | -0.000005056 | 0.000002739  | 0.000008242  |
| H  | -0.000004686 | 0.000004334  | 0.000011921  |
| C  | -0.000003042 | 0.000002157  | 0.000006168  |
| C  | -0.000005316 | 0.000002474  | 0.000007742  |
| H  | -0.000007994 | 0.000002430  | 0.000008478  |
| H  | -0.000004000 | 0.000003583  | 0.000009908  |
| H  | -0.000005577 | 0.000001670  | 0.000005852  |
| C  | 0.000004549  | 0.000000632  | -0.000000115 |
| C  | 0.000006690  | 0.000000010  | -0.000002255 |
| H  | 0.000005167  | -0.000000316 | -0.000002454 |
| H  | 0.000007128  | -0.000001001 | -0.000004780 |
| H  | 0.000009294  | 0.000000826  | -0.000001186 |
| N  | -0.000004742 | -0.000001694 | -0.000002345 |

|    |              |              |              |
|----|--------------|--------------|--------------|
| C  | -0.000004070 | -0.000002687 | -0.000005006 |
| O  | -0.000006185 | -0.000003063 | -0.000005307 |
| O  | -0.000001199 | -0.000003101 | -0.000007007 |
| C  | -0.000000222 | -0.000004070 | -0.000009554 |
| H  | -0.000002192 | -0.000004304 | -0.000009535 |
| H  | 0.000002459  | -0.000003476 | -0.000009132 |
| C  | -0.000000156 | -0.000005420 | -0.000012972 |
| Cl | -0.000004464 | -0.000006440 | -0.000013848 |
| Cl | 0.000003061  | -0.000005120 | -0.000013180 |
| Cl | 0.000001220  | -0.000006543 | -0.000015988 |

### Rh nitrene (triplet state)

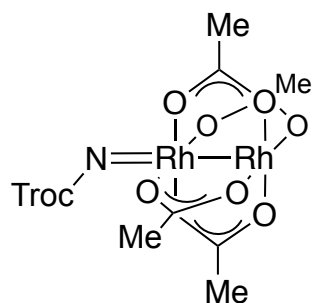

UM06/6-31G(d,p)[LANL2DZ]

Electronic Energy = -2833.530333

Electronic and Zero-Point Energy = -2833.262826

Enthalpy = -2833.235075

Free Energy = -2833.321382

UM06/6-311++G(2d,2p)[SDD]

Electronic Energy = -2836.137797

|    |              |              |              |
|----|--------------|--------------|--------------|
| Rh | -0.000000573 | 0.000000686  | -0.000002045 |
| Rh | 0.000000673  | 0.000001570  | -0.000000674 |
| O  | -0.000002057 | -0.000001884 | -0.000001686 |
| O  | -0.000003253 | -0.000002421 | -0.000003412 |
| O  | -0.000000934 | 0.000003107  | -0.000005858 |
| O  | -0.000000070 | 0.000003567  | -0.000004708 |
| O  | 0.000001339  | -0.000000473 | 0.000003290  |
| O  | -0.000000164 | -0.000001712 | 0.000001854  |
| O  | 0.000002152  | 0.000003819  | -0.000000625 |

|    |              |              |              |
|----|--------------|--------------|--------------|
| O  | 0.000003217  | 0.000004891  | 0.000000201  |
| C  | -0.000003416 | -0.000003032 | -0.000002902 |
| C  | -0.000005340 | -0.000005346 | -0.000003813 |
| H  | -0.000005726 | -0.000004685 | -0.000005413 |
| H  | -0.000005329 | -0.000006680 | -0.000002077 |
| H  | -0.000006378 | -0.000006336 | -0.000004619 |
| C  | -0.000000697 | 0.000003951  | -0.000006359 |
| C  | -0.000001079 | 0.000005552  | -0.000009226 |
| H  | 0.000000110  | 0.000007316  | -0.000009109 |
| H  | -0.000002308 | 0.000004434  | -0.000010256 |
| H  | -0.000001381 | 0.000006003  | -0.000010417 |
| C  | 0.000003434  | 0.000005267  | 0.000000136  |
| C  | 0.000005385  | 0.000007620  | 0.000000991  |
| H  | 0.000005832  | 0.000009360  | -0.000000326 |
| H  | 0.000005417  | 0.000007787  | 0.000000842  |
| H  | 0.000006378  | 0.000007518  | 0.000003106  |
| C  | 0.000000740  | -0.000001709 | 0.000003653  |
| C  | 0.000001184  | -0.000003283 | 0.000006529  |
| H  | 0.000002698  | -0.000001942 | 0.000007854  |
| H  | 0.000000897  | -0.000004372 | 0.000007353  |
| H  | 0.000000371  | -0.000004574 | 0.000006581  |
| N  | 0.000001276  | 0.000001674  | 0.000000442  |
| C  | 0.000000195  | -0.000000320 | 0.000000786  |
| O  | -0.000000650 | -0.000000403 | -0.000000813 |
| O  | 0.000000193  | -0.000002155 | 0.000003141  |
| C  | -0.000000958 | -0.000004370 | 0.000003693  |
| H  | -0.000001818 | -0.000004358 | 0.000001929  |
| H  | -0.000001833 | -0.000006102 | 0.000004129  |
| C  | 0.000000298  | -0.000004414 | 0.000006236  |
| Cl | 0.000001741  | -0.000001691 | 0.000005620  |
| Cl | 0.000001727  | -0.000004497 | 0.000009159  |
| Cl | -0.000001294 | -0.000007363 | 0.000006816  |

**transition state TS for C-H insertion of dimethylsilacyclopentane (singlet state)**



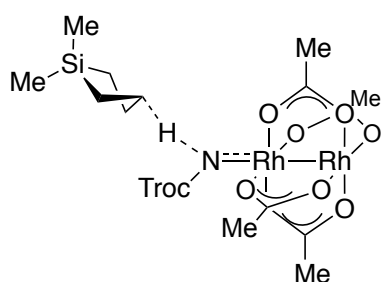

M06/6-31G(d,p)[LANL2DZ]

Electronic Energy = -3359.90675919

Electronic and Zero-Point Energy = -3359.455442

Enthalpy = -3359.411894

Free Energy = -3359.536186

M06/6-311++G(2d,2p)[SDD]

Electronic Energy = -3362.606526

|    |             |             |             |
|----|-------------|-------------|-------------|
| Rh | -2.91839300 | -1.74742900 | 0.06572100  |
| Rh | -0.80023100 | -0.56170600 | -0.00771300 |
| O  | -0.20067200 | -1.82790100 | -1.51774400 |
| O  | -2.10876800 | -3.03641200 | -1.34754200 |
| O  | -3.59179900 | -0.51432500 | -1.45000000 |
| O  | -1.67241900 | 0.66692800  | -1.40166100 |
| O  | -0.14430600 | -1.93730300 | 1.38279900  |
| O  | -2.16802200 | -2.92226900 | 1.57925200  |
| O  | -3.54532200 | -0.34971300 | 1.45634000  |
| O  | -1.51218000 | 0.64543900  | 1.51498400  |
| C  | -0.97022500 | -2.79588000 | -1.83030800 |
| C  | -0.43251200 | -3.74155600 | -2.86366900 |
| H  | 0.06793200  | -3.18295000 | -3.65842600 |
| H  | 0.31431600  | -4.39032200 | -2.39409700 |
| H  | -1.23528400 | -4.35888400 | -3.26988800 |
| C  | -2.84376500 | 0.42012400  | -1.83781900 |
| C  | -3.33802600 | 1.32764700  | -2.92334000 |
| H  | -2.99411100 | 2.35018900  | -2.74462200 |
| H  | -2.91581400 | 0.99759700  | -3.87834900 |
| H  | -4.42679000 | 1.28777900  | -2.98579300 |
| C  | -2.72663600 | 0.51530900  | 1.87196600  |
| C  | -3.20872400 | 1.50597000  | 2.89113300  |

|    |             |             |             |
|----|-------------|-------------|-------------|
| H  | -3.08152300 | 2.51917200  | 2.49534900  |
| H  | -4.25618100 | 1.32669700  | 3.13775000  |
| H  | -2.59190600 | 1.43060100  | 3.79150300  |
| C  | -0.95503400 | -2.77446400 | 1.89108200  |
| C  | -0.40110000 | -3.64303400 | 2.98059500  |
| H  | -0.40010300 | -3.07406900 | 3.91619900  |
| H  | 0.63300500  | -3.91461800 | 2.75676700  |
| H  | -1.02063600 | -4.53239400 | 3.10781900  |
| N  | 0.87487200  | 0.44678800  | 0.00842700  |
| C  | 1.90490700  | 0.01685000  | -0.80056900 |
| O  | 2.21554600  | 0.48537100  | -1.87214600 |
| O  | 2.56313300  | -0.98583300 | -0.15989500 |
| C  | 3.77834100  | -1.39343600 | -0.73767800 |
| H  | 3.88860300  | -0.97798600 | -1.74631200 |
| H  | 3.79377300  | -2.48802800 | -0.77447100 |
| C  | 4.95661000  | -0.93063200 | 0.11147000  |
| Cl | 4.98468100  | 0.84794900  | 0.21241200  |
| Cl | 4.85914400  | -1.62093100 | 1.75216100  |
| Cl | 6.44377100  | -1.51718500 | -0.69755500 |
| C  | 1.49379600  | 5.08863100  | -0.50937600 |
| C  | 1.68810900  | 3.56091900  | -0.54872500 |
| C  | 0.34294000  | 2.94063000  | -0.89283300 |
| C  | -0.71691800 | 3.44891000  | 0.06046300  |
| H  | 2.29946500  | 5.59695500  | 0.03213100  |
| H  | 1.48946000  | 5.49265300  | -1.53221100 |
| H  | 1.98340700  | 3.19780000  | 0.44950400  |
| H  | 2.46878000  | 3.24506600  | -1.25160100 |
| H  | 0.07993300  | 3.09305600  | -1.95147000 |
| H  | 0.42393900  | 1.80334700  | -0.78752600 |
| H  | -1.73752400 | 3.24423400  | -0.28331500 |
| H  | -0.59547600 | 2.94967200  | 1.03490400  |
| Si | -0.23704400 | 5.28758500  | 0.25157800  |
| C  | -0.20866100 | 5.80330700  | 2.05941000  |
| H  | 0.13511600  | 6.83668800  | 2.18210200  |
| H  | -1.20469500 | 5.72574400  | 2.51118300  |
| H  | 0.46691200  | 5.15346400  | 2.62899700  |

|   |             |            |             |
|---|-------------|------------|-------------|
| C | -1.34538200 | 6.41844800 | -0.76296100 |
| H | -2.37090000 | 6.43223200 | -0.37649100 |
| H | -0.97423900 | 7.44986600 | -0.76325900 |
| H | -1.38385300 | 6.07827300 | -1.80525700 |

**transition state TS for C-H insertion of dimethylsilacyclopentane (triplet state)**

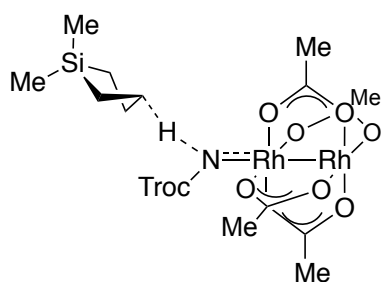

UM06/6-31G(d,p)[LANL2DZ]

Electronic Energy = -3359.903298

Electronic and Zero-Point Energy = -3359.45522

Enthalpy = -3359.412421

Free Energy = -3359.533915

UM06/6-311++G(2d,2p)[SDD]

Electronic Energy = -3362.601964

|    |            |             |             |
|----|------------|-------------|-------------|
| Rh | 3.81826300 | 0.19484600  | -0.22856400 |
| Rh | 1.46413600 | -0.26023200 | 0.11926800  |
| O  | 1.50737900 | -1.26328400 | -1.68542900 |
| O  | 3.70541700 | -0.84319200 | -2.00638400 |
| O  | 4.21777900 | -1.57571500 | 0.74873600  |
| O  | 2.01996600 | -1.98636500 | 1.08901600  |
| O  | 1.07400400 | 1.52468700  | -0.86157000 |
| O  | 3.27064000 | 1.95089700  | -1.18353100 |
| O  | 3.79902100 | 1.20274600  | 1.57394100  |
| O  | 1.59791400 | 0.79822400  | 1.88521500  |
| C  | 2.59773200 | -1.35118300 | -2.33299800 |
| C  | 2.53889800 | -2.15034200 | -3.60081900 |

|    |             |             |             |
|----|-------------|-------------|-------------|
| H  | 1.70294200  | -1.80618300 | -4.21577700 |
| H  | 3.47790300  | -2.06745300 | -4.15000000 |
| H  | 2.34801600  | -3.19862300 | -3.35062600 |
| C  | 3.25553600  | -2.26367600 | 1.19165900  |
| C  | 3.58911000  | -3.51946700 | 1.94028300  |
| H  | 3.63081500  | -3.28894600 | 3.01012300  |
| H  | 2.81082100  | -4.26969600 | 1.78629400  |
| H  | 4.56509300  | -3.89638900 | 1.62848200  |
| C  | 2.71984800  | 1.29678700  | 2.21922600  |
| C  | 2.73684100  | 2.05950900  | 3.51075600  |
| H  | 2.47486900  | 1.38522500  | 4.33164200  |
| H  | 3.72162800  | 2.49493500  | 3.68615400  |
| H  | 1.97544400  | 2.84412600  | 3.48031300  |
| C  | 2.04522100  | 2.22690200  | -1.28698600 |
| C  | 1.66658400  | 3.49438200  | -1.99690000 |
| H  | 1.32475000  | 3.24504500  | -3.00707500 |
| H  | 2.52401500  | 4.16571500  | -2.06758200 |
| H  | 0.83526400  | 3.97980200  | -1.47690800 |
| N  | -0.49185500 | -0.52694100 | 0.25208900  |
| C  | -1.25473900 | -1.58710900 | -0.15022600 |
| O  | -0.90356500 | -2.74428300 | -0.17404200 |
| O  | -2.50347400 | -1.16304300 | -0.53880100 |
| C  | -3.41312100 | -2.15904900 | -0.92583300 |
| H  | -2.95041000 | -3.15197800 | -0.86956500 |
| H  | -3.74936300 | -1.96289200 | -1.95144000 |
| C  | -4.63581700 | -2.13735700 | -0.01980800 |
| Cl | -4.16550400 | -2.45811700 | 1.66567200  |
| Cl | -5.46446300 | -0.54937000 | -0.12203600 |
| Cl | -5.74455300 | -3.41371900 | -0.60027800 |
| C  | -2.43306200 | 2.12540100  | -0.81173100 |
| C  | -1.78266200 | 1.74107000  | 0.49071500  |
| C  | -2.81200800 | 1.55398000  | 1.58953800  |
| C  | -3.73183600 | 2.79710900  | 1.60006900  |
| H  | -1.71010400 | 2.46026300  | -1.56338800 |
| H  | -3.00103200 | 1.27574300  | -1.22082800 |
| H  | -0.94802800 | 2.40222600  | 0.77134000  |

|    |             |            |             |
|----|-------------|------------|-------------|
| H  | -1.17761100 | 0.65870600 | 0.34988900  |
| H  | -3.40866300 | 0.66132400 | 1.35114600  |
| H  | -2.33617000 | 1.37188800 | 2.56080800  |
| H  | -4.74004900 | 2.55387800 | 1.95672600  |
| H  | -3.33132600 | 3.56585900 | 2.27530600  |
| Si | -3.66879800 | 3.44077400 | -0.19185200 |
| C  | -5.32034700 | 3.42421100 | -1.09020300 |
| H  | -6.01980900 | 4.13733700 | -0.63846100 |
| H  | -5.20363600 | 3.69601200 | -2.14541700 |
| H  | -5.78441100 | 2.43176600 | -1.05078800 |
| C  | -2.88436000 | 5.15013400 | -0.26512500 |
| H  | -2.75453900 | 5.49430100 | -1.29765300 |
| H  | -3.48832900 | 5.89679600 | 0.26356600  |
| H  | -1.89460800 | 5.12864200 | 0.20936000  |

**Product (singlet state)**

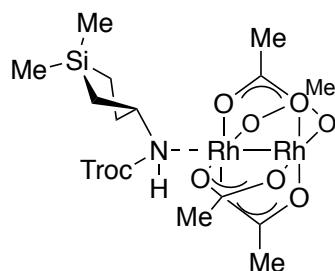

M06/6-31G(d,p)[LANL2DZ]

Electronic Energy = -3360.043432

Electronic and Zero-Point Energy = -3359.581922

Enthalpy = -3359.540332

Free Energy = -3359.655018

M06/6-311++G(2d,2p)[SDD]

Electronic Energy = -3362.739627

|    |             |             |             |
|----|-------------|-------------|-------------|
| Rh | 0.86755300  | -2.91013200 | 0.34853700  |
| Rh | 0.50829500  | -0.58732400 | -0.20455000 |
| O  | -0.40590000 | -0.37997900 | 1.64061400  |
| O  | -0.07709700 | -2.56214900 | 2.14798100  |
| O  | 2.67650200  | -2.38439300 | 1.20156900  |
| O  | 2.31564000  | -0.19708000 | 0.75803500  |

|    |             |             |             |
|----|-------------|-------------|-------------|
| O  | -1.28604200 | -1.11466300 | -1.06492000 |
| O  | -0.95902700 | -3.29002300 | -0.53488300 |
| O  | 1.79306200  | -3.10385100 | -1.49594300 |
| O  | 1.47979300  | -0.92140800 | -1.99761500 |
| C  | -0.49650500 | -1.39410300 | 2.39548700  |
| C  | -1.18638900 | -1.19959200 | 3.71584500  |
| H  | -1.32110900 | -0.13828700 | 3.93261200  |
| H  | -2.16576300 | -1.68901000 | 3.67888300  |
| H  | -0.61157500 | -1.68528900 | 4.50871700  |
| C  | 2.98760900  | -1.16248900 | 1.23738100  |
| C  | 4.26788800  | -0.79338000 | 1.93168400  |
| H  | 4.80630100  | -0.04038700 | 1.34829600  |
| H  | 4.02948600  | -0.34741900 | 2.90344900  |
| H  | 4.89065900  | -1.67552000 | 2.08888600  |
| C  | 1.89344100  | -2.09799000 | -2.24963600 |
| C  | 2.55218200  | -2.29304400 | -3.58463800 |
| H  | 3.32245000  | -1.53088700 | -3.73226900 |
| H  | 2.98661100  | -3.29118500 | -3.65794800 |
| H  | 1.80572200  | -2.15988300 | -4.37421400 |
| C  | -1.62512600 | -2.34011300 | -1.03434200 |
| C  | -2.95540400 | -2.68537800 | -1.63583800 |
| H  | -3.12765900 | -2.08840600 | -2.53475300 |
| H  | -3.74501600 | -2.44033600 | -0.91633300 |
| H  | -3.00176100 | -3.75203100 | -1.86239200 |
| N  | 0.20314200  | 1.56278100  | -1.03422700 |
| C  | -1.16458400 | 1.84757300  | -1.18764800 |
| O  | -1.72057400 | 1.95988500  | -2.24758700 |
| O  | -1.74832500 | 1.98593300  | 0.02052300  |
| C  | -3.06224800 | 2.49038500  | 0.04760900  |
| H  | -3.28329700 | 3.07202800  | -0.85581700 |
| H  | -3.12681900 | 3.12977500  | 0.93432200  |
| C  | -4.13618600 | 1.41060100  | 0.18813300  |
| Cl | -4.36244500 | 0.49201100  | -1.31186500 |
| Cl | -3.74043200 | 0.29981700  | 1.52140500  |
| Cl | -5.65884500 | 2.29199900  | 0.56878700  |
| C  | 1.65069300  | 4.80342900  | 0.44589400  |

|    |             |            |             |
|----|-------------|------------|-------------|
| C  | 0.62301700  | 3.97834700 | -0.34411000 |
| C  | 1.05790400  | 2.51092000 | -0.25496700 |
| C  | 2.49581000  | 2.43618500 | -0.76210700 |
| H  | 1.64365600  | 5.85820400 | 0.15112000  |
| H  | 1.41522600  | 4.76958700 | 1.51871500  |
| H  | 0.62901600  | 4.27487800 | -1.40620900 |
| H  | -0.39924200 | 4.12432800 | 0.02817400  |
| H  | 1.01037700  | 2.18537000 | 0.79680000  |
| H  | 0.58059600  | 1.43368500 | -1.97385500 |
| H  | 2.95185400  | 1.46114500 | -0.56621300 |
| H  | 2.49999200  | 2.61678600 | -1.84993800 |
| Si | 3.30244900  | 3.90777600 | 0.12073000  |
| C  | 4.46972000  | 4.87615800 | -0.98669900 |
| H  | 4.84189300  | 5.77791700 | -0.48759200 |
| H  | 5.33821400  | 4.27368200 | -1.27636400 |
| H  | 3.95888300  | 5.18938700 | -1.90526400 |
| C  | 4.13087600  | 3.34580100 | 1.71084200  |
| H  | 5.11907400  | 2.91245200 | 1.51727900  |
| H  | 4.25825800  | 4.16375200 | 2.42859500  |
| H  | 3.51340700  | 2.56977000 | 2.18221400  |

### Intermediate (triplet state)

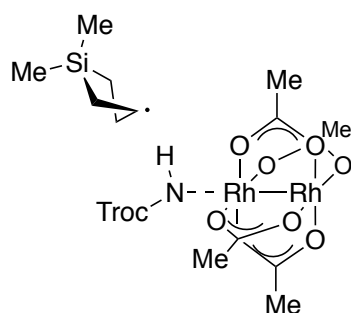

UM06/6-31G(d,p)[LANL2DZ]

Electronic Energy = -3359.926392

Electronic and Zero-Point Energy = -3359.472912

Enthalpy = -3359.429006

Free Energy = -3359.552601

UM06/6-311++G(2d,2p)[SDD]

Electronic Energy = -3362.629534

|    |             |             |             |
|----|-------------|-------------|-------------|
| Rh | 3.83302400  | 0.27093200  | 0.28627800  |
| Rh | 1.49874100  | -0.13639100 | -0.17211500 |
| O  | 2.10381000  | -1.41947000 | -1.65845500 |
| O  | 4.28911000  | -1.07992500 | -1.19772100 |
| O  | 3.76810300  | -1.28032000 | 1.63984600  |
| O  | 1.58597900  | -1.66194700 | 1.19834000  |
| O  | 1.56175400  | 1.46045300  | -1.48379200 |
| O  | 3.76323100  | 1.79395300  | -1.10387200 |
| O  | 3.23341100  | 1.60679600  | 1.74480700  |
| O  | 1.04913500  | 1.20513000  | 1.33046300  |
| C  | 3.34479500  | -1.62328700 | -1.83782400 |
| C  | 3.69686300  | -2.60111400 | -2.91729100 |
| H  | 3.28675100  | -2.25074700 | -3.86903600 |
| H  | 4.77903500  | -2.71582600 | -2.99380600 |
| H  | 3.22725200  | -3.56415000 | -2.69727700 |
| C  | 2.68068000  | -1.90566400 | 1.79423300  |
| C  | 2.65253800  | -3.02605100 | 2.78905000  |
| H  | 2.25550200  | -2.64625600 | 3.73638300  |
| H  | 1.98692600  | -3.81823900 | 2.43976800  |
| H  | 3.66101600  | -3.40733000 | 2.95905500  |
| C  | 2.00010900  | 1.78336500  | 1.94622500  |
| C  | 1.59072100  | 2.74272700  | 3.02328000  |
| H  | 1.26416900  | 2.17131100  | 3.89849700  |
| H  | 2.42817400  | 3.38252100  | 3.30614400  |
| H  | 0.73972200  | 3.34077500  | 2.68566500  |
| C  | 2.66566500  | 2.06528000  | -1.66459100 |
| C  | 2.64103800  | 3.19466100  | -2.65043600 |
| H  | 2.49833700  | 2.78625100  | -3.65590700 |
| H  | 3.57557500  | 3.75632800  | -2.61351600 |
| H  | 1.79036400  | 3.84833800  | -2.44004700 |
| N  | -0.43256300 | -0.37345900 | -0.56745600 |
| C  | -1.12691600 | -1.51223600 | -0.80631400 |
| O  | -0.71524600 | -2.64837200 | -0.80370300 |
| O  | -2.44864500 | -1.18848100 | -1.07948500 |
| C  | -3.33180200 | -2.26350600 | -1.22767900 |



|    |             |             |             |
|----|-------------|-------------|-------------|
| H  | -2.78370300 | -3.21171800 | -1.28628000 |
| H  | -3.92691700 | -2.11543500 | -2.13670000 |
| C  | -4.29418100 | -2.33495400 | -0.04816600 |
| Cl | -3.40161000 | -2.57795000 | 1.47155600  |
| Cl | -5.25635500 | -0.82692500 | 0.06143700  |
| Cl | -5.39429600 | -3.71470800 | -0.34076800 |
| C  | -2.82058300 | 2.45702300  | -1.07681500 |
| C  | -1.94238100 | 2.24823400  | 0.10638100  |
| C  | -2.62788300 | 1.62104600  | 1.28264800  |
| C  | -4.01099800 | 2.29987400  | 1.47913400  |
| H  | -2.38785200 | 3.10658400  | -1.84383400 |
| H  | -3.09590000 | 1.49677800  | -1.55261400 |
| H  | -0.96722400 | 2.72573600  | 0.20233200  |
| H  | -0.98590900 | 0.49092500  | -0.59516300 |
| H  | -2.79956000 | 0.54737600  | 1.07600000  |
| H  | -2.00682400 | 1.66000800  | 2.18552400  |
| H  | -4.77771200 | 1.58324100  | 1.79779400  |
| H  | -3.95142400 | 3.07001400  | 2.25991900  |
| Si | -4.36686600 | 3.14086800  | -0.19088100 |
| C  | -6.00699000 | 2.69271700  | -0.99650400 |
| H  | -6.85297700 | 2.95602500  | -0.35114300 |
| H  | -6.13441200 | 3.22826800  | -1.94447300 |
| H  | -6.06808400 | 1.61963100  | -1.21134600 |
| C  | -4.21573500 | 5.00879900  | -0.01237800 |
| H  | -4.32986900 | 5.52368400  | -0.97326500 |
| H  | -4.96893600 | 5.41003100  | 0.67595200  |
| H  | -3.22721600 | 5.26245700  | 0.39159000  |

**transition state TS for C-H insertion of dimethylcyclopentane (singlet state)**

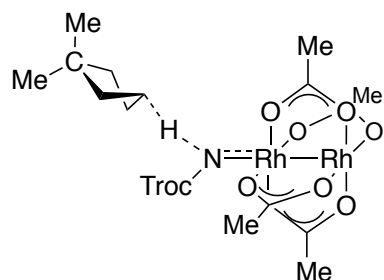

M06/6-31G(d,p)[LANL2DZ]

Electronic Energy = -3108.49541320

Electronic and Zero-Point Energy = -3108.032977

Enthalpy = -3107.992282

Free Energy = -3108.107547

M06/6-311++G(2d,2p)[SDD]

Electronic Energy = -3111.17669927

|    |             |             |             |
|----|-------------|-------------|-------------|
| Rh | -3.45990600 | -0.05040800 | 0.76138500  |
| Rh | -1.31846700 | -0.13049900 | -0.36909500 |
| O  | -0.92408100 | -1.89315100 | 0.63739100  |
| O  | -2.92190800 | -1.81600100 | 1.69911000  |
| O  | -4.27258400 | -1.11930300 | -0.79610000 |
| O  | -2.27700500 | -1.18814200 | -1.85549300 |
| O  | -0.53905000 | 0.91979800  | 1.22240600  |
| O  | -2.53489500 | 1.02628700  | 2.27166500  |
| O  | -3.82930100 | 1.70827500  | -0.26531800 |
| O  | -1.81330500 | 1.64801200  | -1.29521500 |
| C  | -1.79930100 | -2.33348500 | 1.45085300  |
| C  | -1.42964000 | -3.57908600 | 2.20235500  |
| H  | -0.85033400 | -3.29696000 | 3.08828700  |
| H  | -2.32876500 | -4.10360200 | 2.53091600  |
| H  | -0.80646800 | -4.22627900 | 1.58114700  |
| C  | -3.51246200 | -1.46248400 | -1.74380300 |
| C  | -4.09918900 | -2.29088100 | -2.84737400 |
| H  | -3.77838900 | -1.89962700 | -3.81607300 |
| H  | -3.71281300 | -3.31183500 | -2.76405300 |
| H  | -5.18779900 | -2.30736100 | -2.77618400 |
| C  | -2.95660300 | 2.15586200  | -1.05875700 |
| C  | -3.29253200 | 3.39956800  | -1.82865500 |
| H  | -3.58249400 | 3.11502500  | -2.84557300 |
| H  | -4.12379000 | 3.92674700  | -1.35745700 |
| H  | -2.41492800 | 4.04591900  | -1.90446100 |
| C  | -1.30795900 | 1.28524100  | 2.17119900  |
| C  | -0.66452100 | 2.11015300  | 3.24646600  |
| H  | 0.24382400  | 1.61387000  | 3.60033900  |
| H  | -1.35825700 | 2.27269700  | 4.07251000  |

|    |             |             |             |
|----|-------------|-------------|-------------|
| H  | -0.36598000 | 3.07567300  | 2.82333000  |
| N  | 0.42612700  | -0.12042400 | -1.35604100 |
| C  | 1.21906700  | -1.20625700 | -1.10709100 |
| O  | 1.05797200  | -2.20494300 | -1.77785200 |
| O  | 2.12791400  | -1.06652500 | -0.11087300 |
| C  | 2.93209100  | -2.20191200 | 0.12132300  |
| H  | 2.72956700  | -2.97324500 | -0.63090400 |
| H  | 2.71760400  | -2.59711300 | 1.12133800  |
| C  | 4.40614100  | -1.83444600 | 0.05704700  |
| Cl | 4.79373400  | -1.10677000 | -1.52368300 |
| Cl | 4.83298100  | -0.69490600 | 1.36564200  |
| Cl | 5.33025200  | -3.34928200 | 0.27270600  |
| C  | 2.47138300  | 2.26895700  | 0.55161000  |
| C  | 1.58445200  | 2.07196100  | -0.65338100 |
| C  | 2.49615600  | 2.26588800  | -1.84114400 |
| C  | 3.26502400  | 3.51971900  | -1.41697500 |
| H  | 1.91250600  | 2.51182300  | 1.46319000  |
| H  | 3.02745100  | 1.34135300  | 0.74751300  |
| H  | 0.68738600  | 2.70785200  | -0.67754700 |
| H  | 1.09119000  | 1.01521500  | -0.67786700 |
| H  | 3.18040300  | 1.40544300  | -1.91825100 |
| H  | 1.96840000  | 2.36016400  | -2.79498700 |
| H  | 4.22197900  | 3.63421300  | -1.94164900 |
| H  | 2.66290900  | 4.40975900  | -1.65062500 |
| C  | 4.89141000  | 3.01947800  | 0.46102500  |
| H  | 5.58497000  | 3.83110800  | 0.20297000  |
| H  | 5.00379700  | 2.80685200  | 1.53293200  |
| H  | 5.20160300  | 2.12144000  | -0.09071200 |
| C  | 3.08807400  | 4.71105900  | 0.80917600  |
| H  | 3.24910300  | 4.65176900  | 1.89378600  |
| H  | 3.69652800  | 5.54032100  | 0.42369600  |
| H  | 2.03219700  | 4.96284400  | 0.63684100  |
| C  | 3.45574100  | 3.40091700  | 0.12274000  |

## Reference

1. H. Lebel and K. Huard, *Org. Lett.*, 2007, **9**, 639.
2. S. Hashimoto, N. Watanabe, S. Ikegami, *Tetrahedron Lett.*, 1992, **33**, 2709.
3. S. W. Kwok, L. Zhang, N. P. Grimster, V. V. Fokin, *Angew. Chem. Int. Ed.*, 2014, **53**, 3452.
4. S. E. S. Martin and D. A. Watson, *J. Am. Chem. Soc.*, 2013, **135**, 13330.
5. Z. Zhang, Z. Han, G. Gu, X. Dong and X. Zhang, *Adv. Synth. Catal.*, 2017, **359**, 2585.
6. M. Rubin, T. Schwier and V. Gevorgyan, *J. Org. Chem.*, 2002, **67**, 1936.
7. M. Fujita and T. Hiyama, *J. Org. Chem.*, 1988, **53**, 5405.
8. Y. Yabusaki, N. Ohshima, H. Kondo, T. Kusamoto, Y. Yamonoi and H. Nishihara, *Chem. Eur. J.*, 2010, **16**, 5581.
9. J. D. Sunderhaus, H. Lam and G. B. Dudley, *Org. Lett.*, 2003, **5**, 4571.
10. P. I. Gudnason and I. Arnason, *Org. Lett.*, 2009, **11**, 2015.
11. E. Morita, K. Murakami, M. Iwasaki, K. Hirano, H. Yorimitsu and K. Oshima, *Bull. Chem. Soc. Jpn.*, 2009, **82**, 1012.
12. X. Liu, C. Zarate and R. Martin, *Angew. Chem. Int. Ed.*, 2019, **58**, 2064.
13. J. Rantala, J. Paulasaari, J. Pietikäinen, T. Törmänen, N. Hacker and N. Viswanathan, Internal Patent, WO 2004090936A2, 2004.
14. C. Zarate and R. Martin, *J. Am. Chem. Soc.*, 2014, **136**, 2236.
15. M. S. Yusubov, D. Y. Svitich, A. Yoshimura, B. J. Kastern, V. N. Nemykin and V. K. Zhdankin, *Eur. J. Org. Chem.*, 2015, **22**, 4831.
16. Y. Yamonoi and H. Nishihara, *J. Org. Chem.*, 2008, **73**, 6671.
17. J. O. Daiss, C. Burschka, J. S. Mills, J. G. Montana, G. A. Showell, J. B. H. Warneck and R. Tacke, *Organometallics*, 2006, **25**, 1188.
18. A. Lesbani, H. Kondo, Y. Yabusaki, M. Nakai, Y. Yamonoi and H. Nishihara, *Chem. Eur. J.*, 2010, **16**, 13519.
19. 8a) Y. Zhao and D. G. Truhlar, *Theor. Chem. Acc.*, 2008, **120**, 215; (b) Y. Zhao and D. G. Truhlar, *Acc. Chem. Res.*, 2008, **41**, 157; (c) Y. Zhao and D. G. Truhlar, *J. Chem. Theory Comput.*, 2009, **5**, 324; (d) A. D. Kulkarni and D. G. Truhlar, *J. Chem. Theory Comput.*, 2011, **7**, 2325.
20. Gaussian 09, Revision E.01, M. J. Frisch, G. W. Trucks, H. B. Schlegel, G. E. Scuseria, M. A. Robb, J. R. Cheeseman, G. Scalmani, V. Barone, B. Mennucci, G. A. Petersson, H. Nakatsuji, M. Caricato, A. Li, H. P. Hratchian, A. F. Izmaylov, J. Bloino, G. Zheng, J. L. Sonnenberg, M. Hada, M. Ehara, K. Toyota, R. Fukuda, J. Hasegawa, M. Ishida, T. Nakajima, Y. Honda, O. Kitao, H. Nakai, T. Vreven, J. A. Jr. Montgomery, J. E. Peralta, F. Ogliaro, M. Bearpark, J. J. Heyd, E. Brothers, K. N. Kudin, V. N. Staroverov, T. Keith, R. Kobayashi, J. Normand, K. Raghavachari, A. Rendell, J. C. Burant, S. S. Iyengar, J. Tomasi, M. Cossi, N. Rega, J. M. Millam, M. Klene, J. E. Knox, J. B. Cross, V. Bakken, C. Adamo, J. Jaramillo, R. Gomperts, R. E. Stratmann, O.

- Yazyev, A. J. Austin, R. Cammi, C. Pomelli, J. W. Ochterski, R. L. Martin, K. Morokuma, V. G. Zakrzewski, G. A. Voth, P. Salvador, J. J. Dannenberg, S. Dapprich, A. D. Daniels, O. Farkas, J. B. Foresman, J. V. Ortiz, J. Cioslowski and D. J. Fox, Gaussian, Inc., Wallingford CT, 2013.
21. P. J. Hay and W. R. Wadt, *J. Chem. Phys.*, 1985, **82**, 270.
22. (a) D. Andrae, U. Häussermann, M. Dolg, H. Stoll and H. Preuss, *Theor. Chim. Acta*, 1990, **77**, 123; (b) L. E. Roy, P. J. Hay and R. L. Martin, *J. Chem. Theory Comput.*, 2008, **4**, 1029.
23. A. V. Marenich, C. J. Cramer and D. G. Truhlar, *J. Phys. Chem. B*, 2009, **113**, 6378.

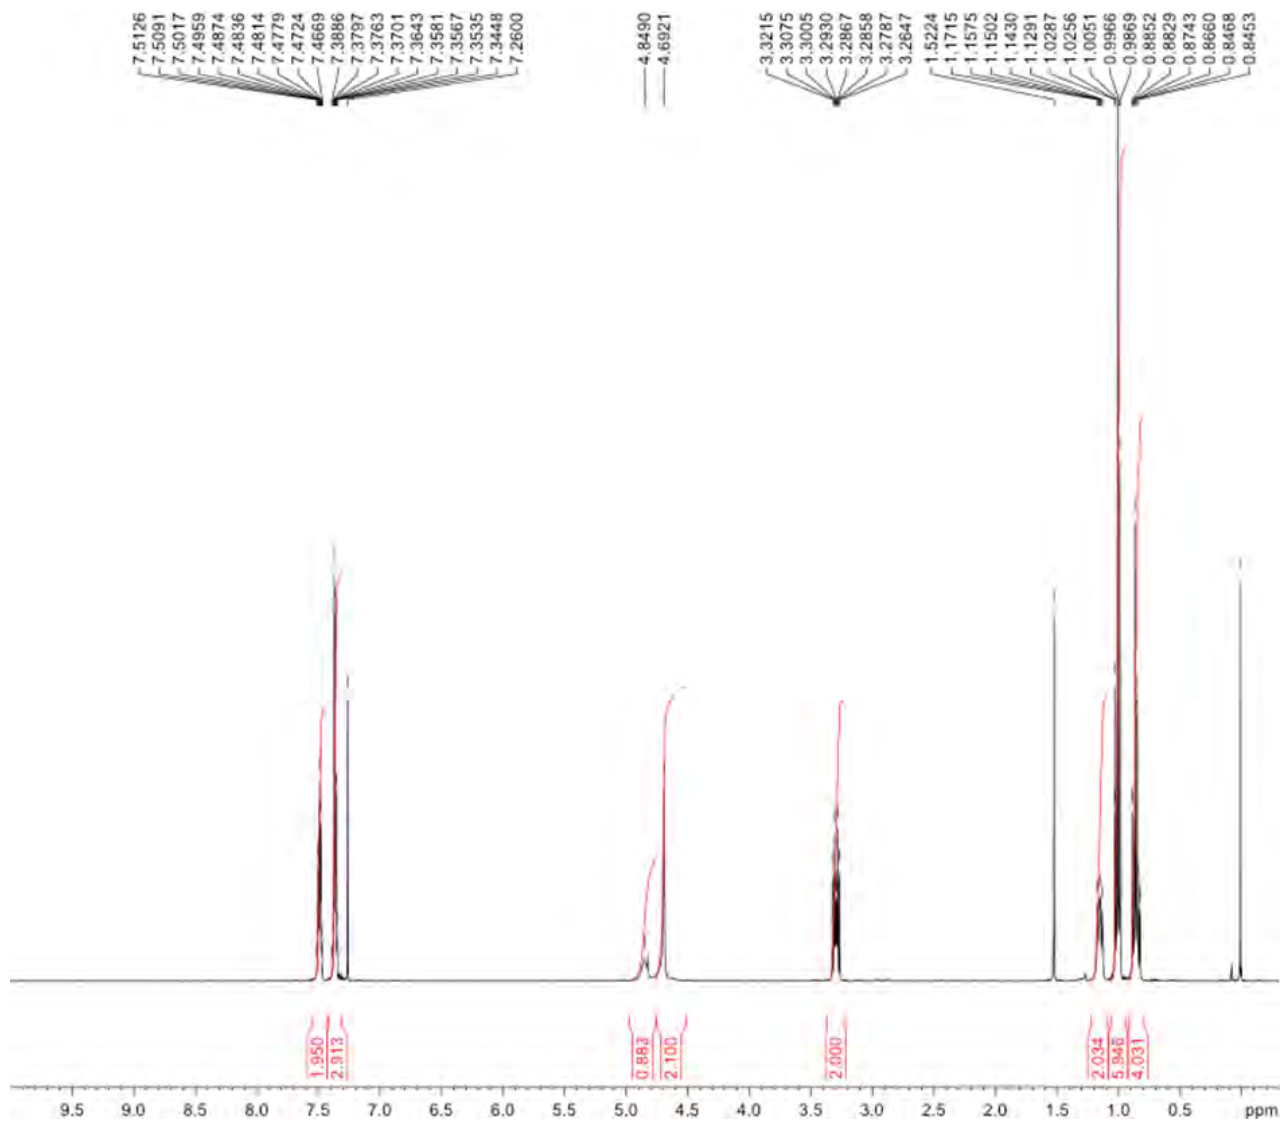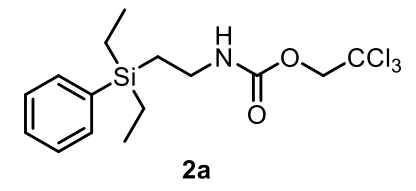

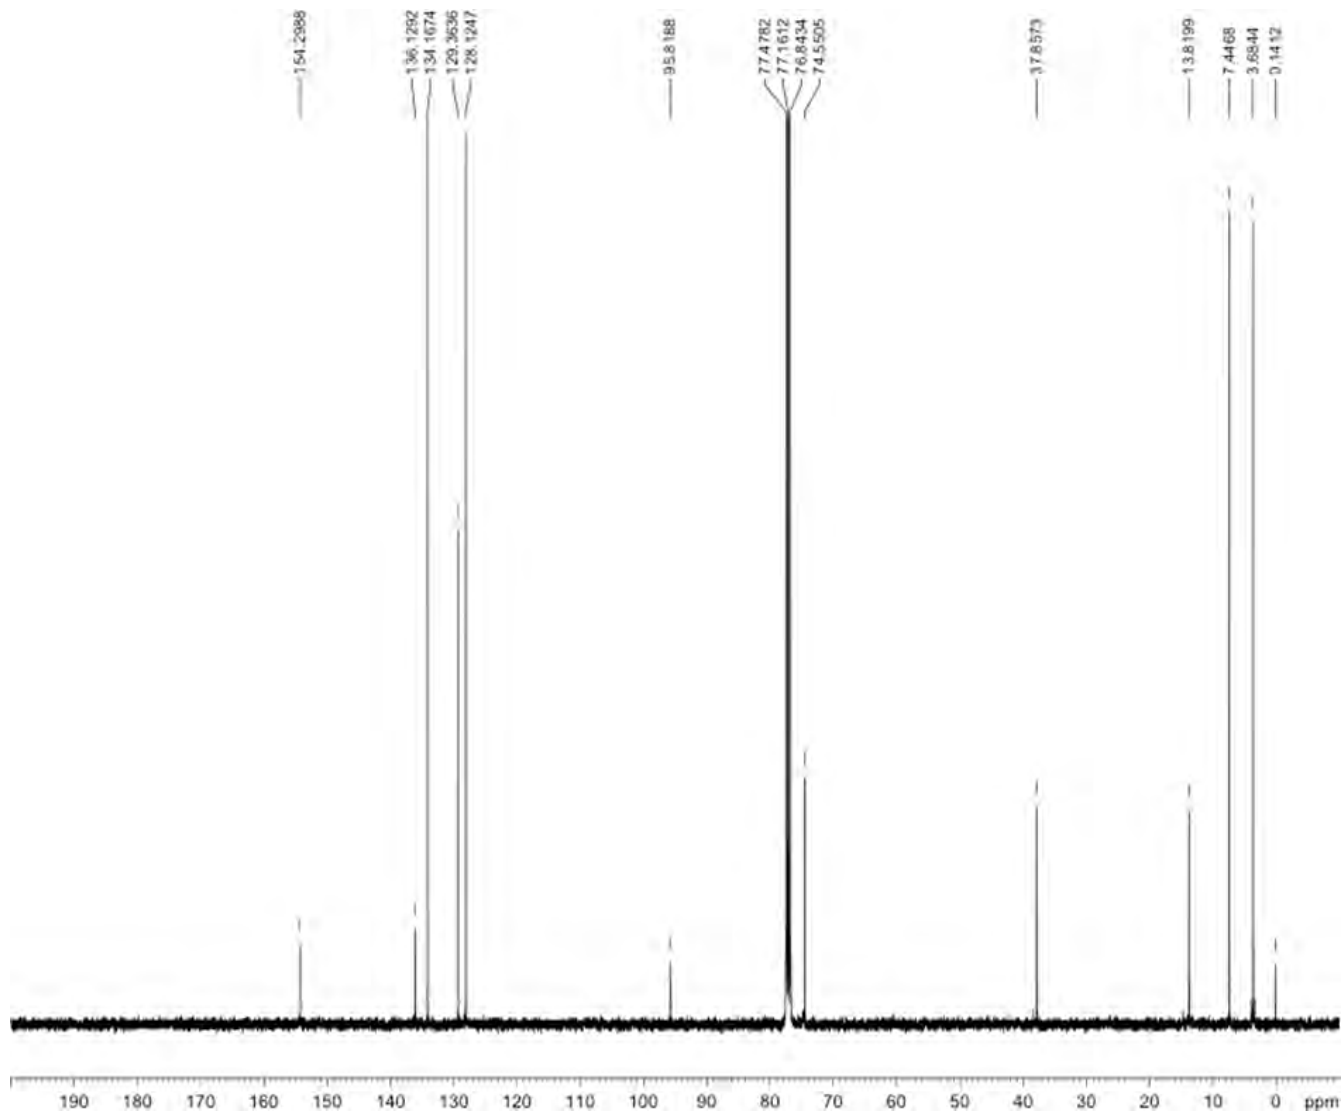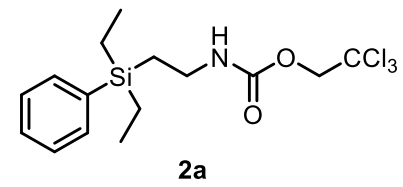

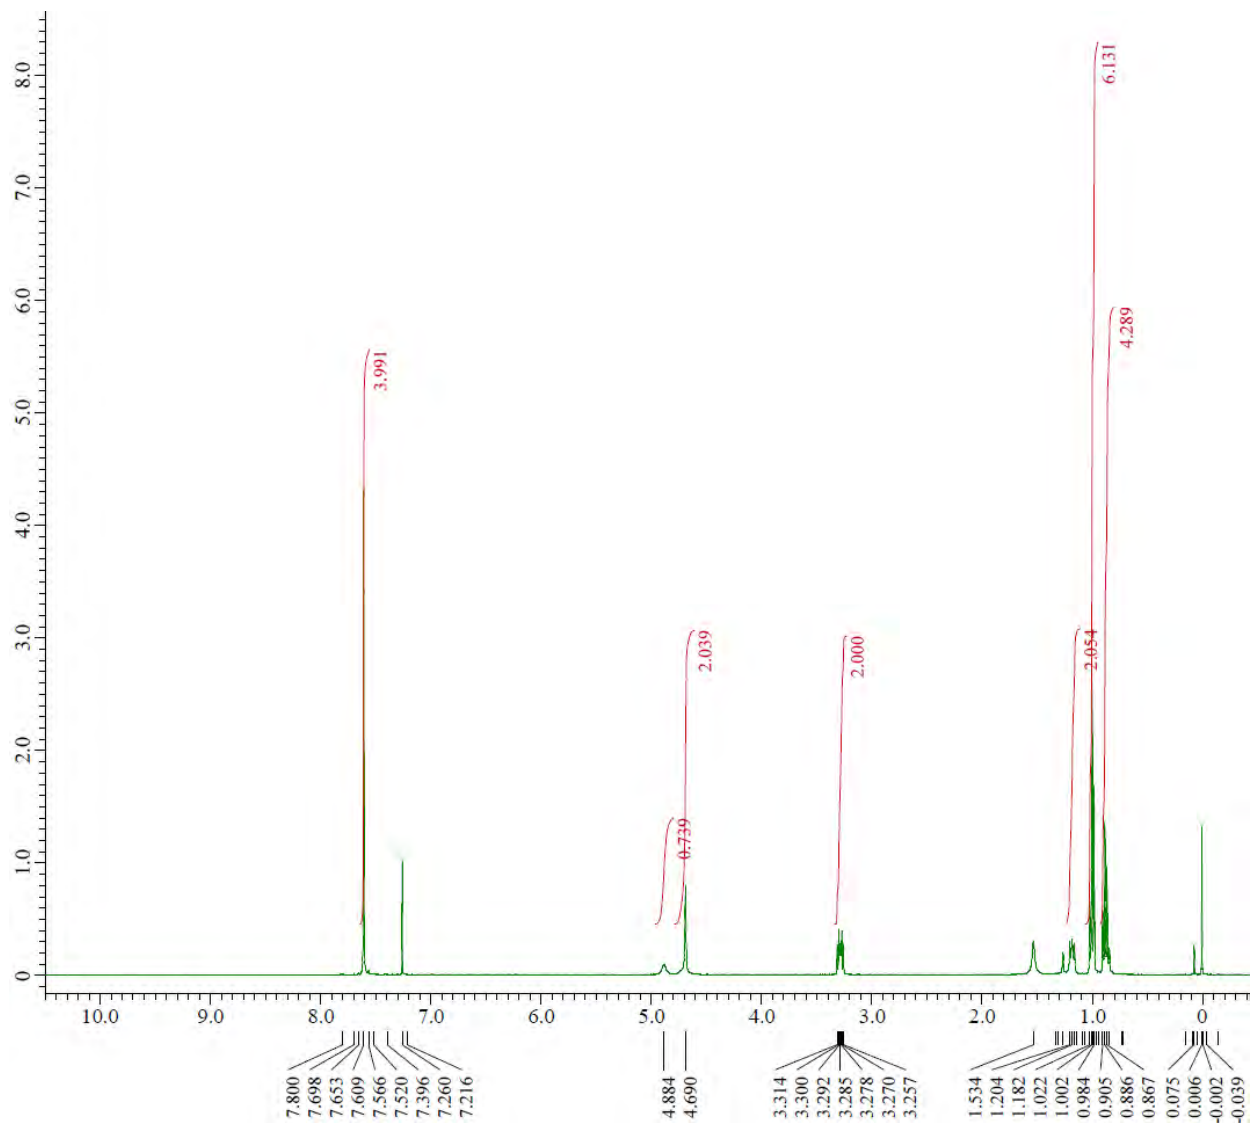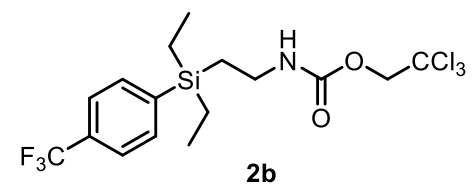



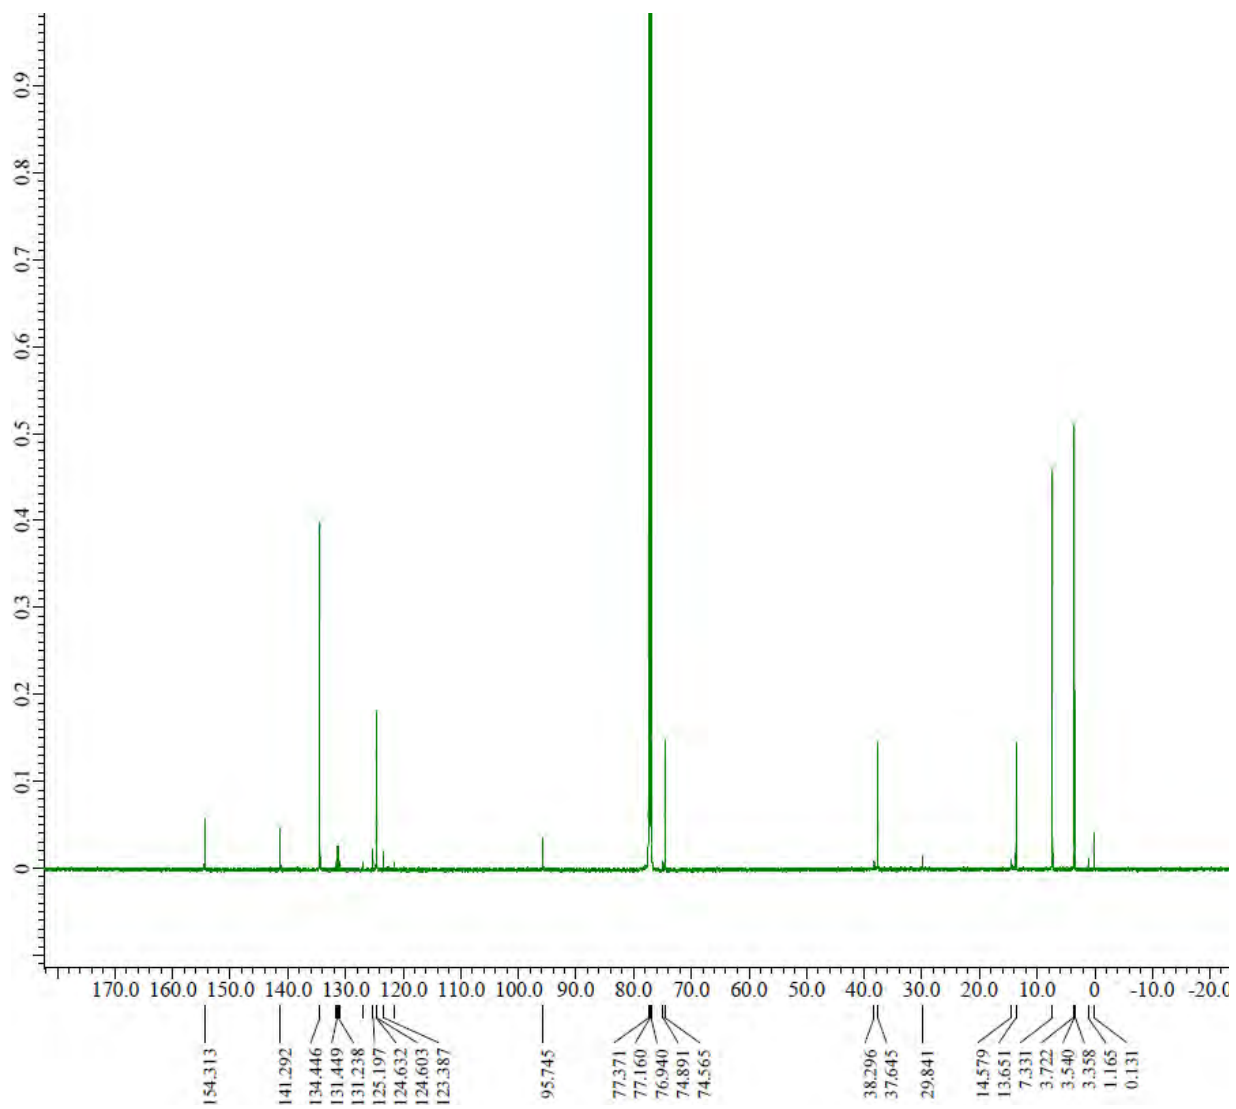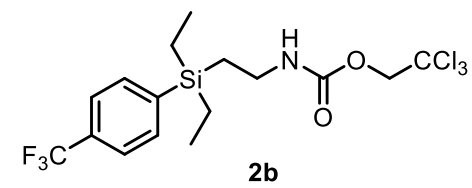

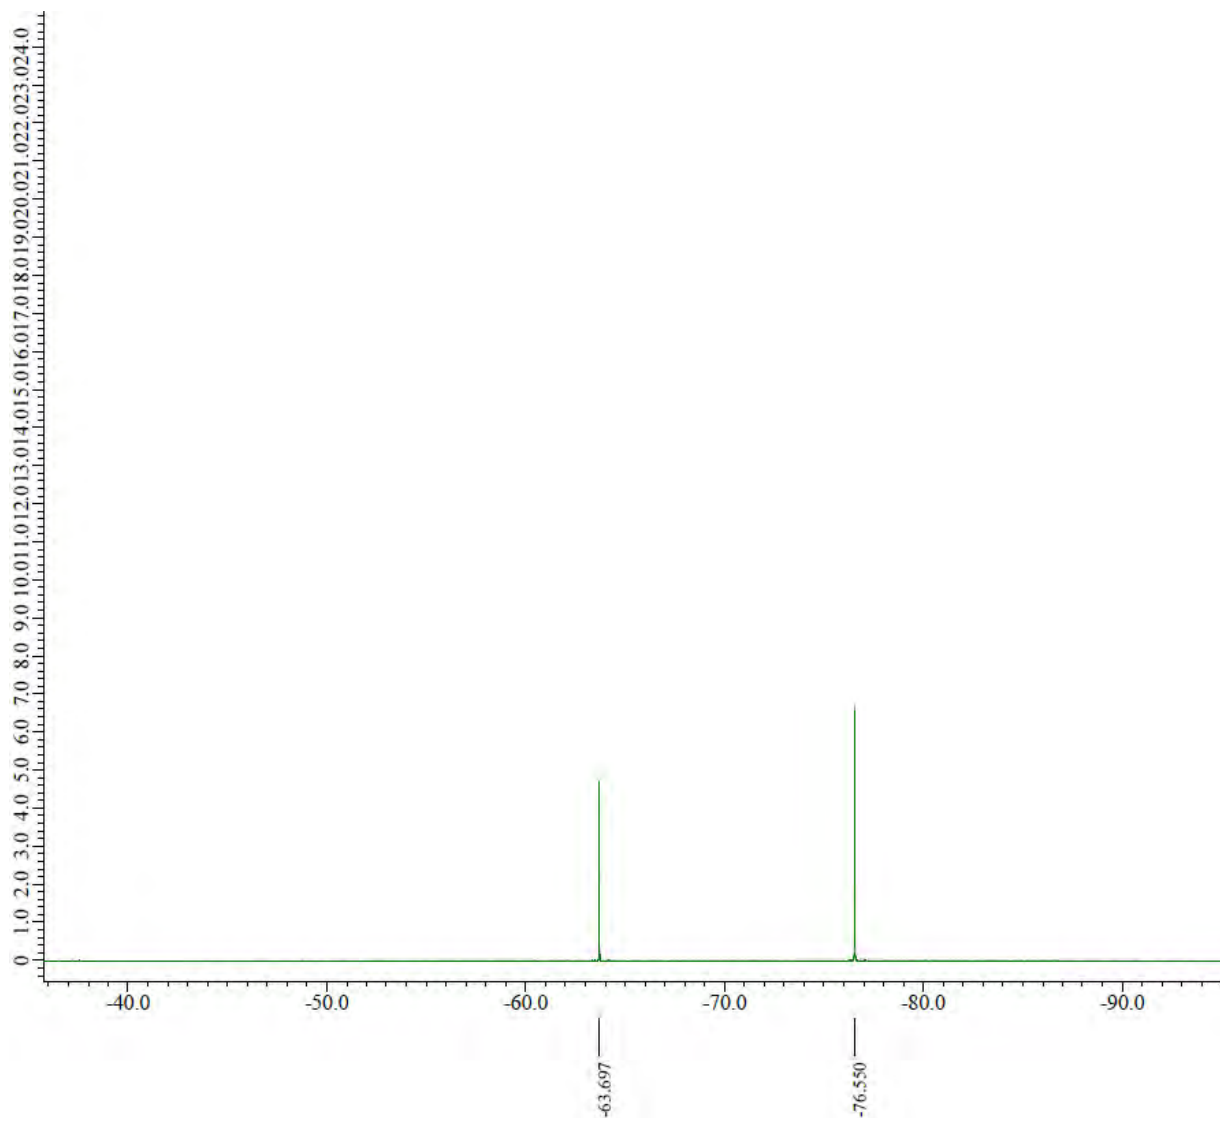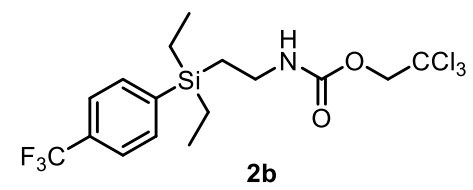

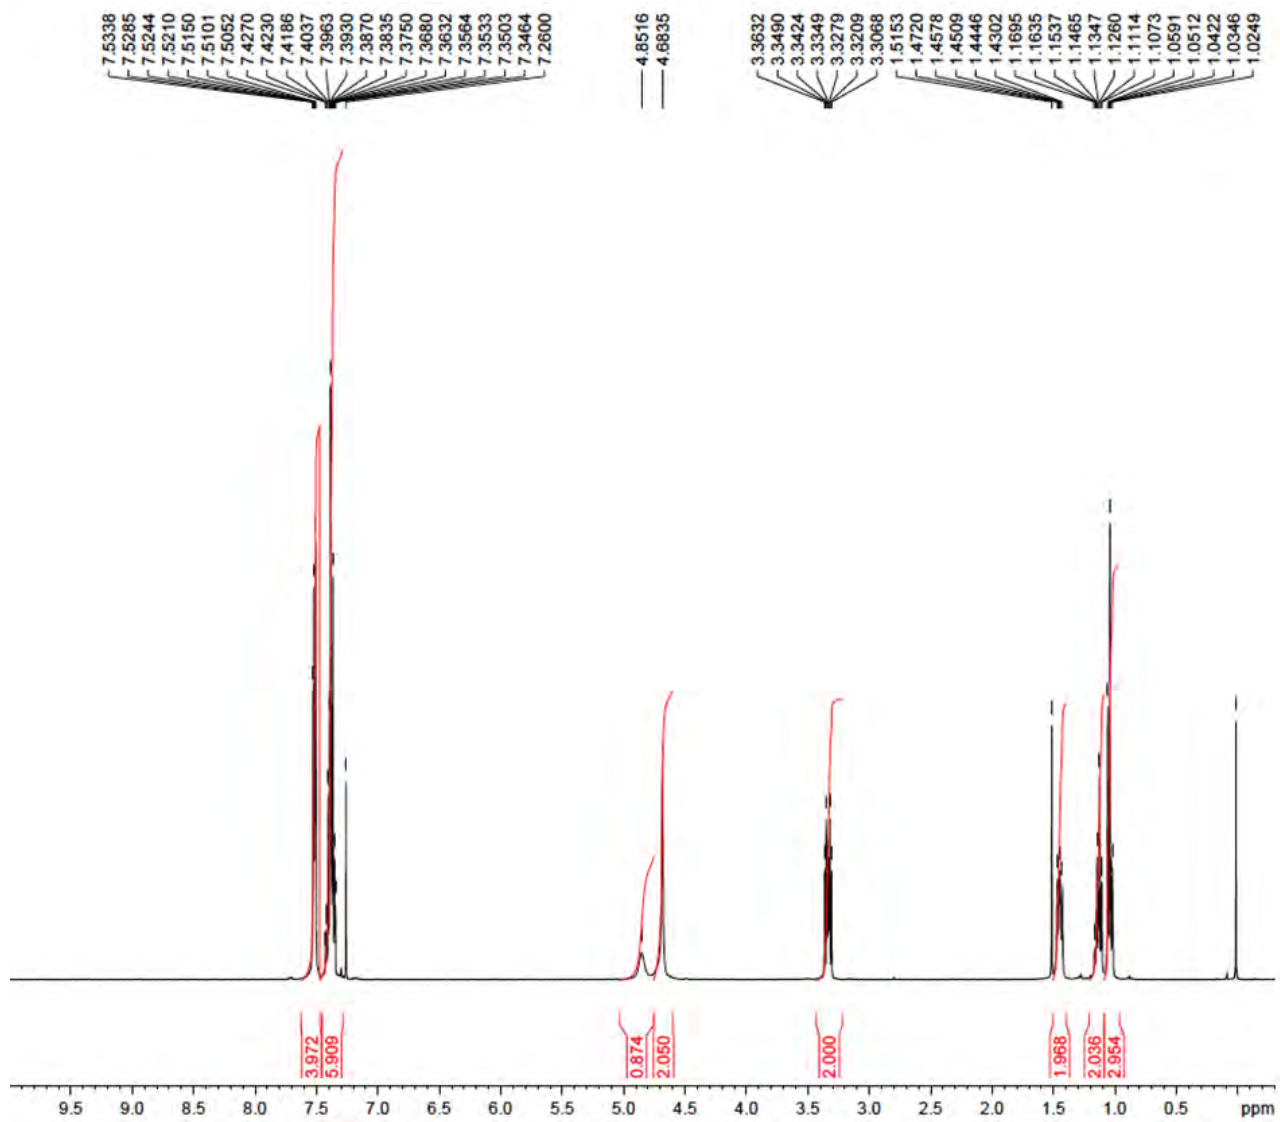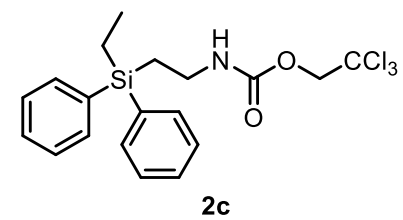

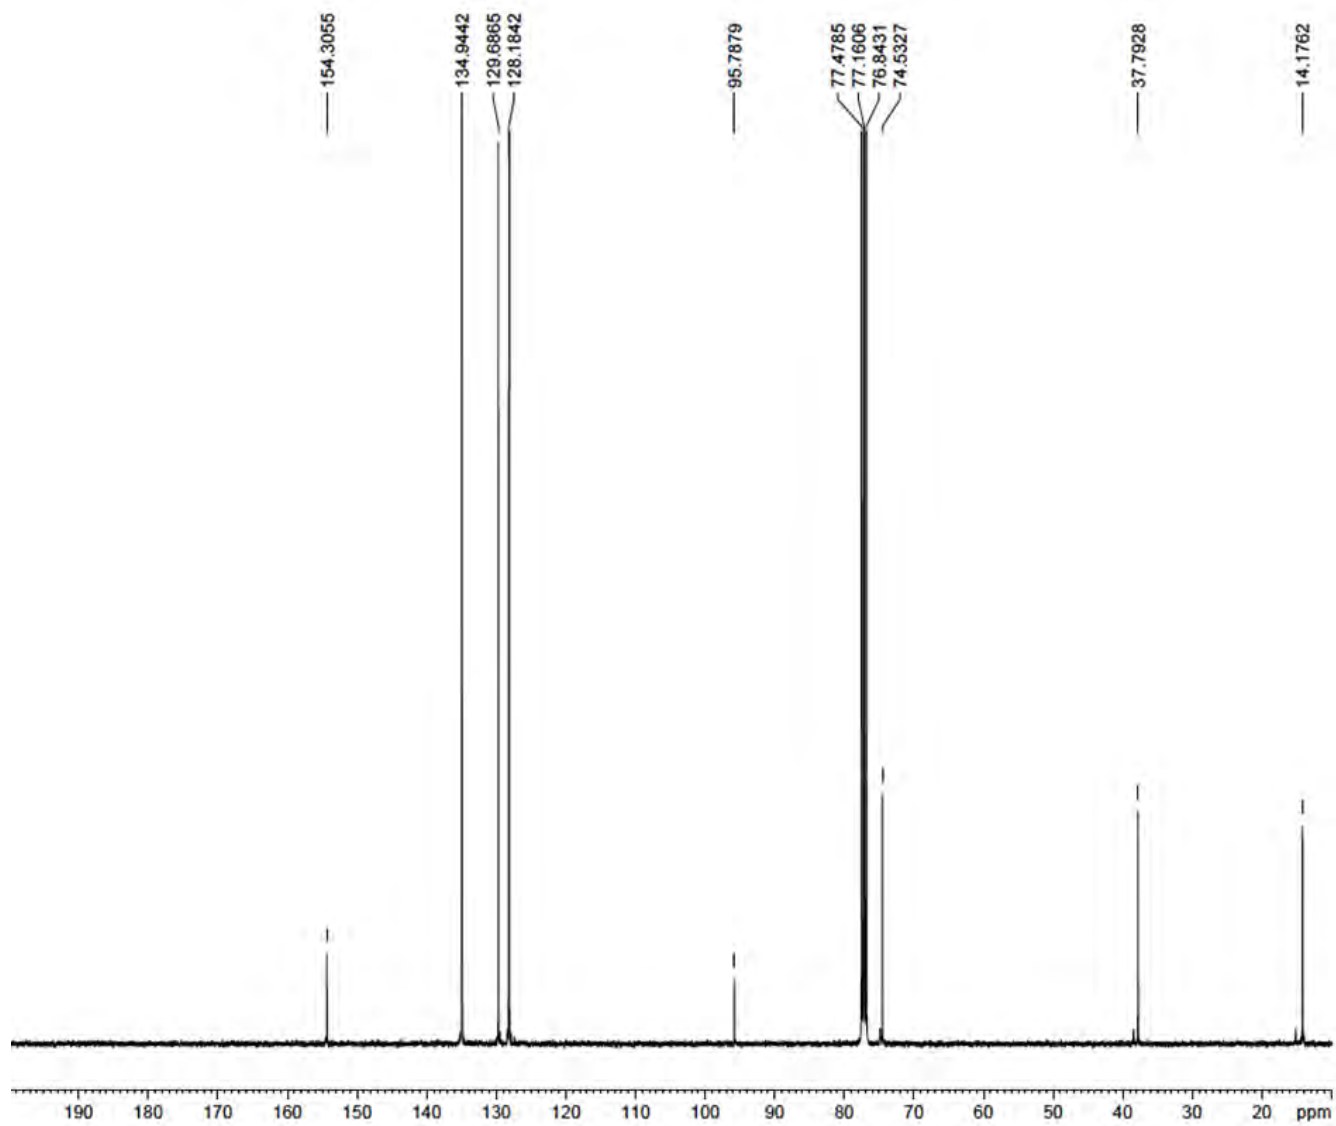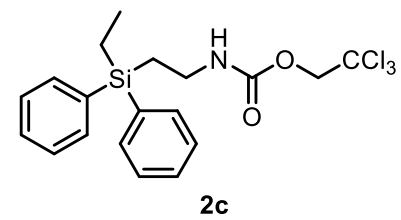

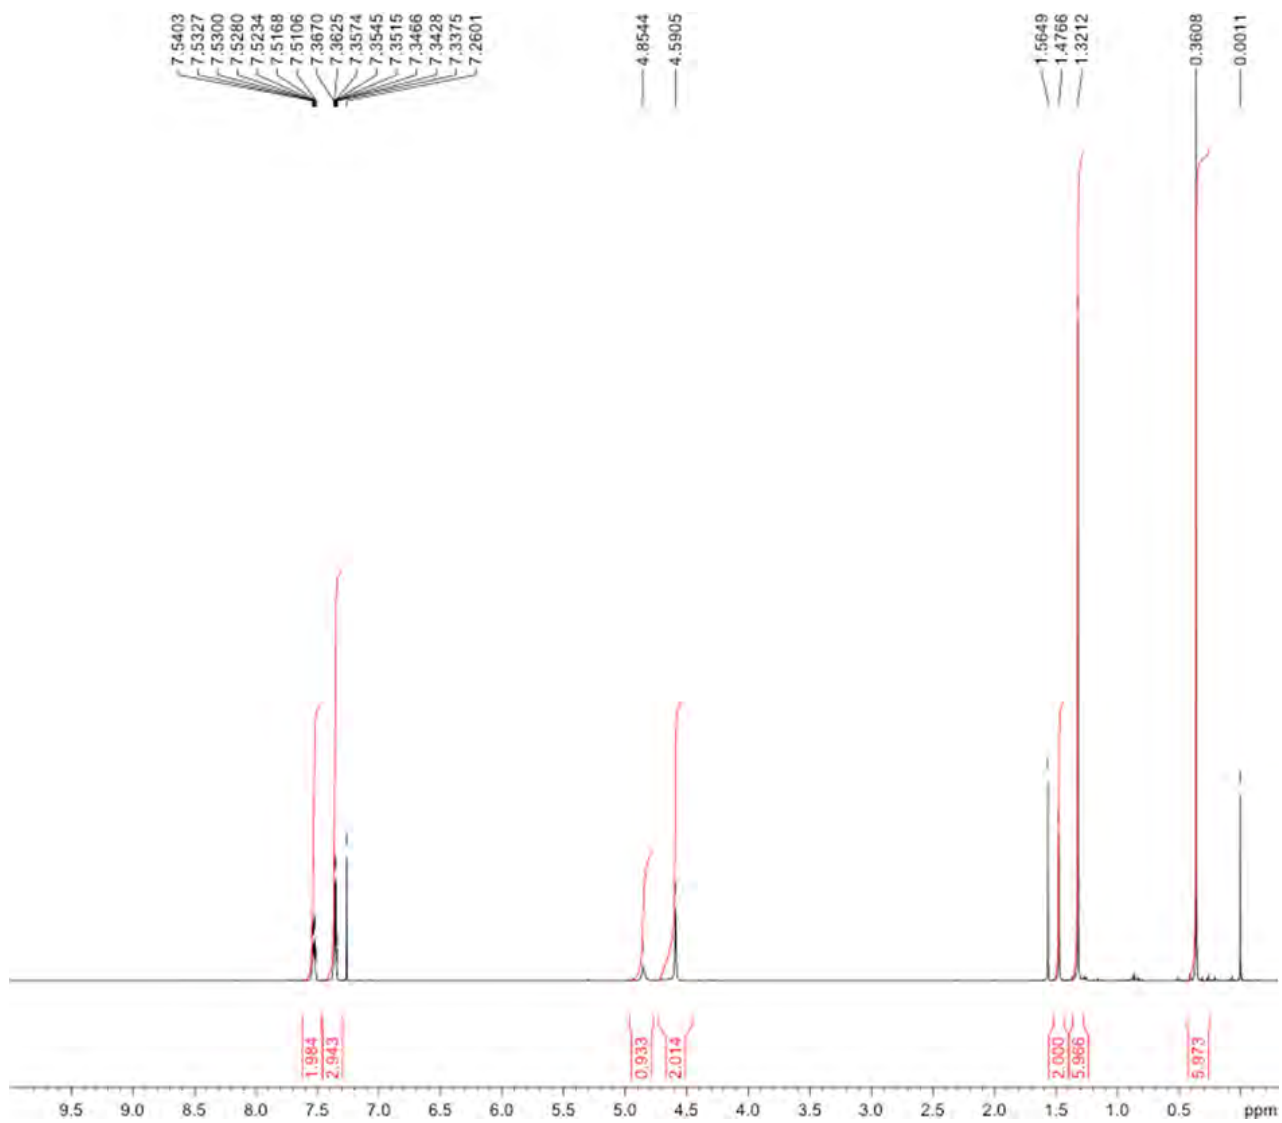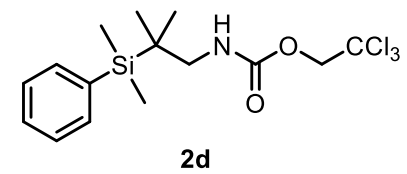

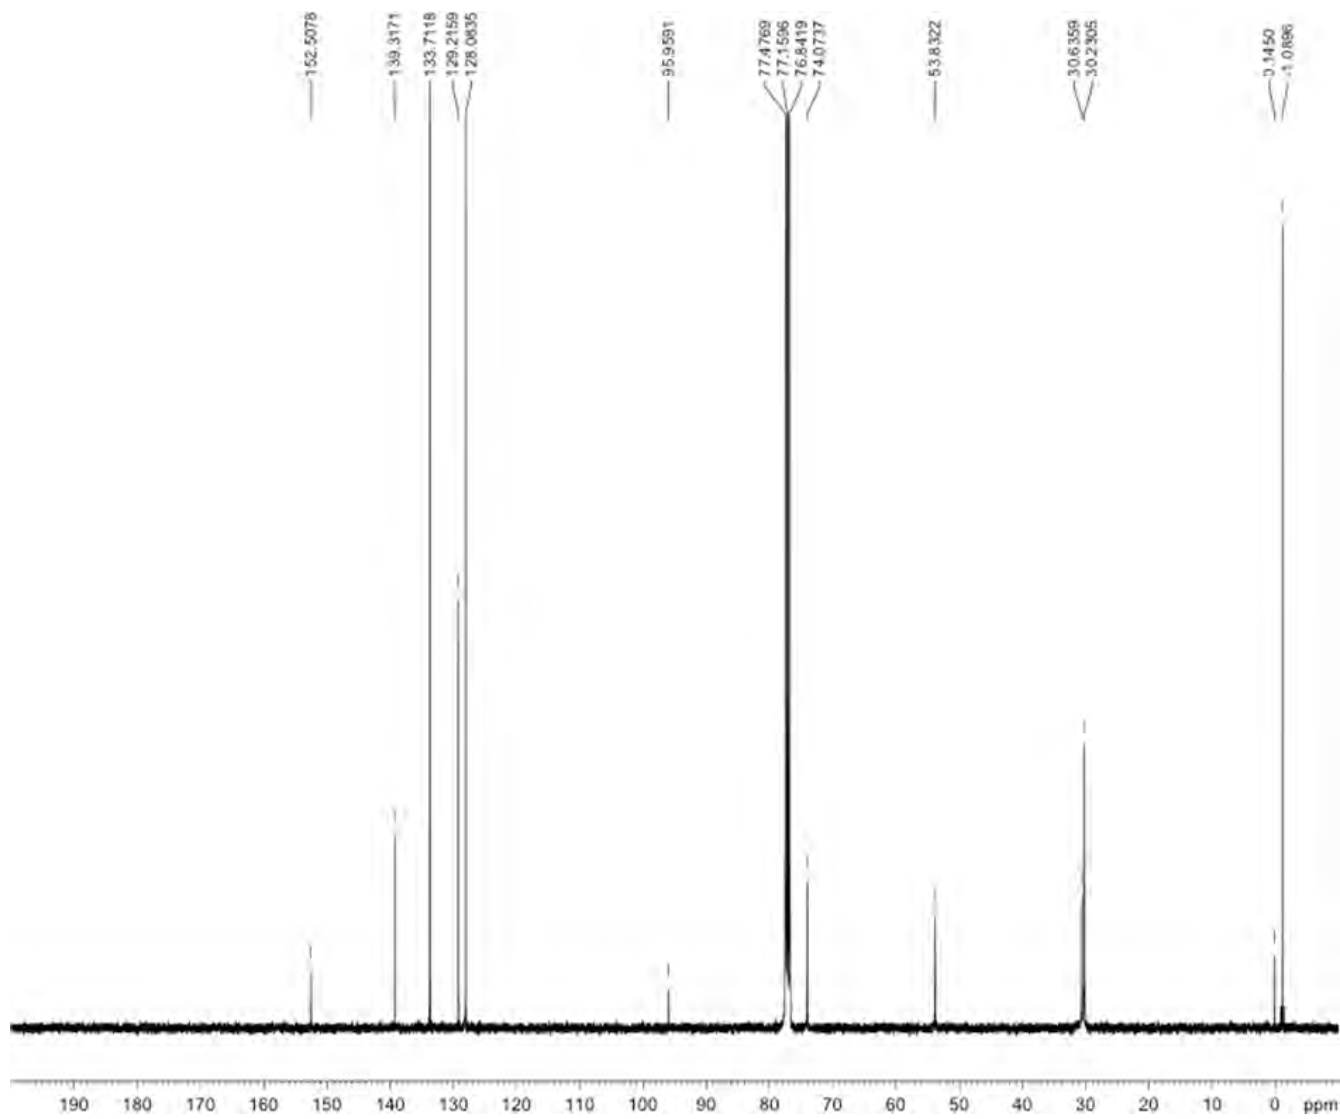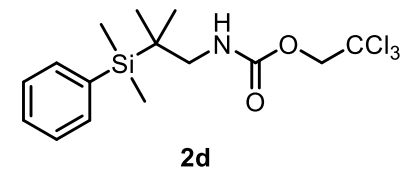

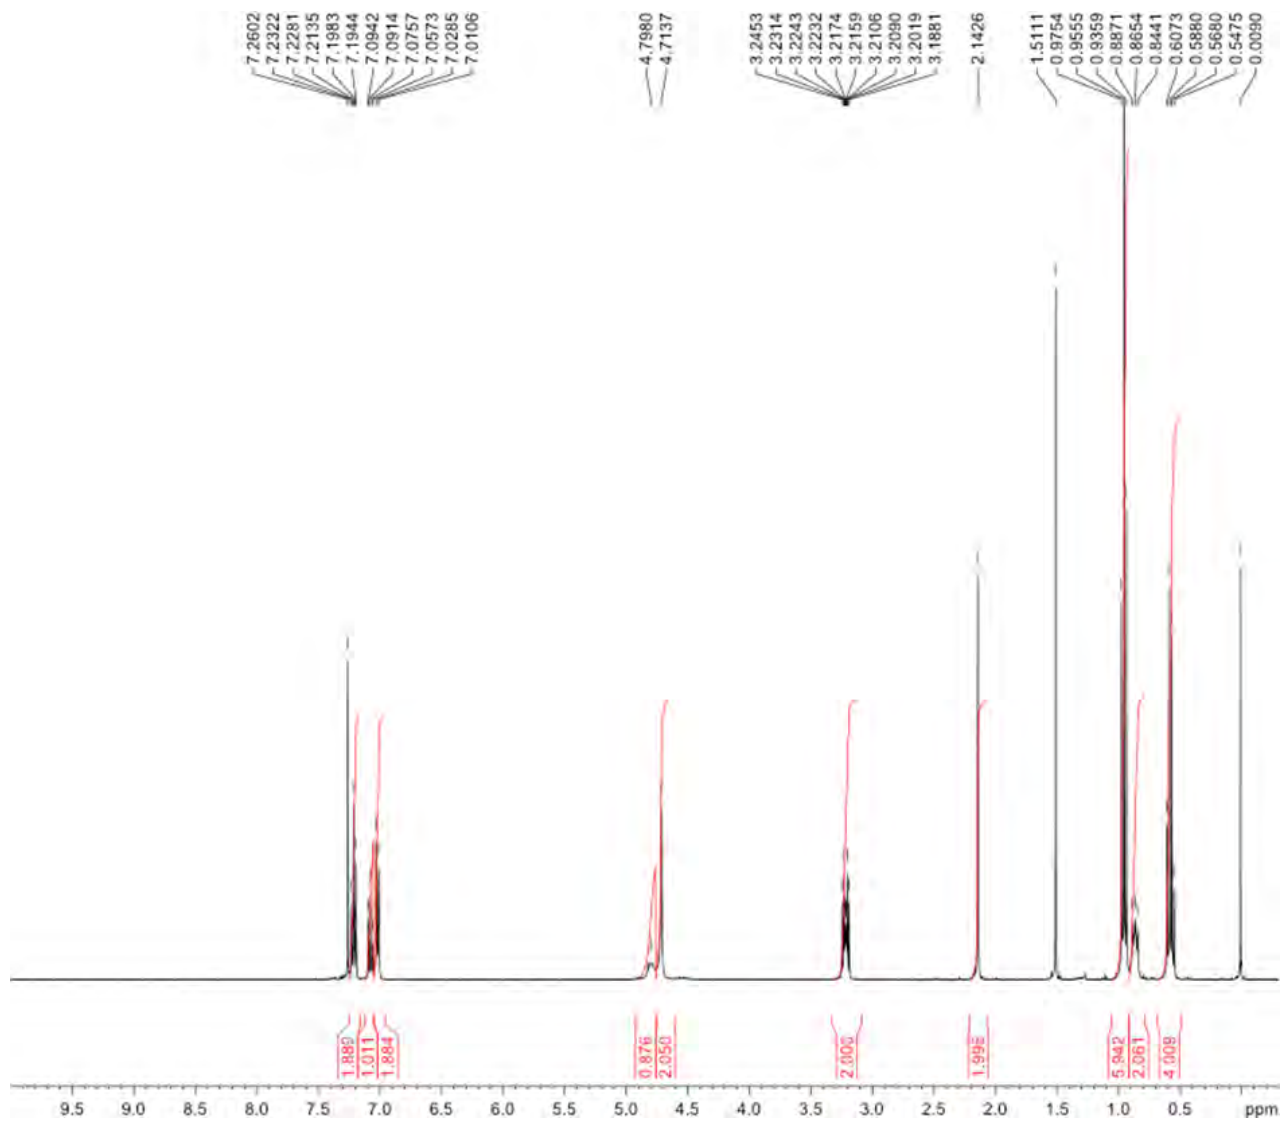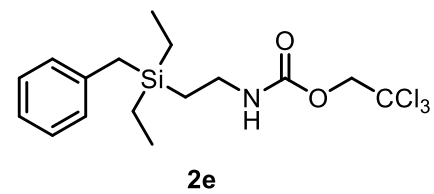

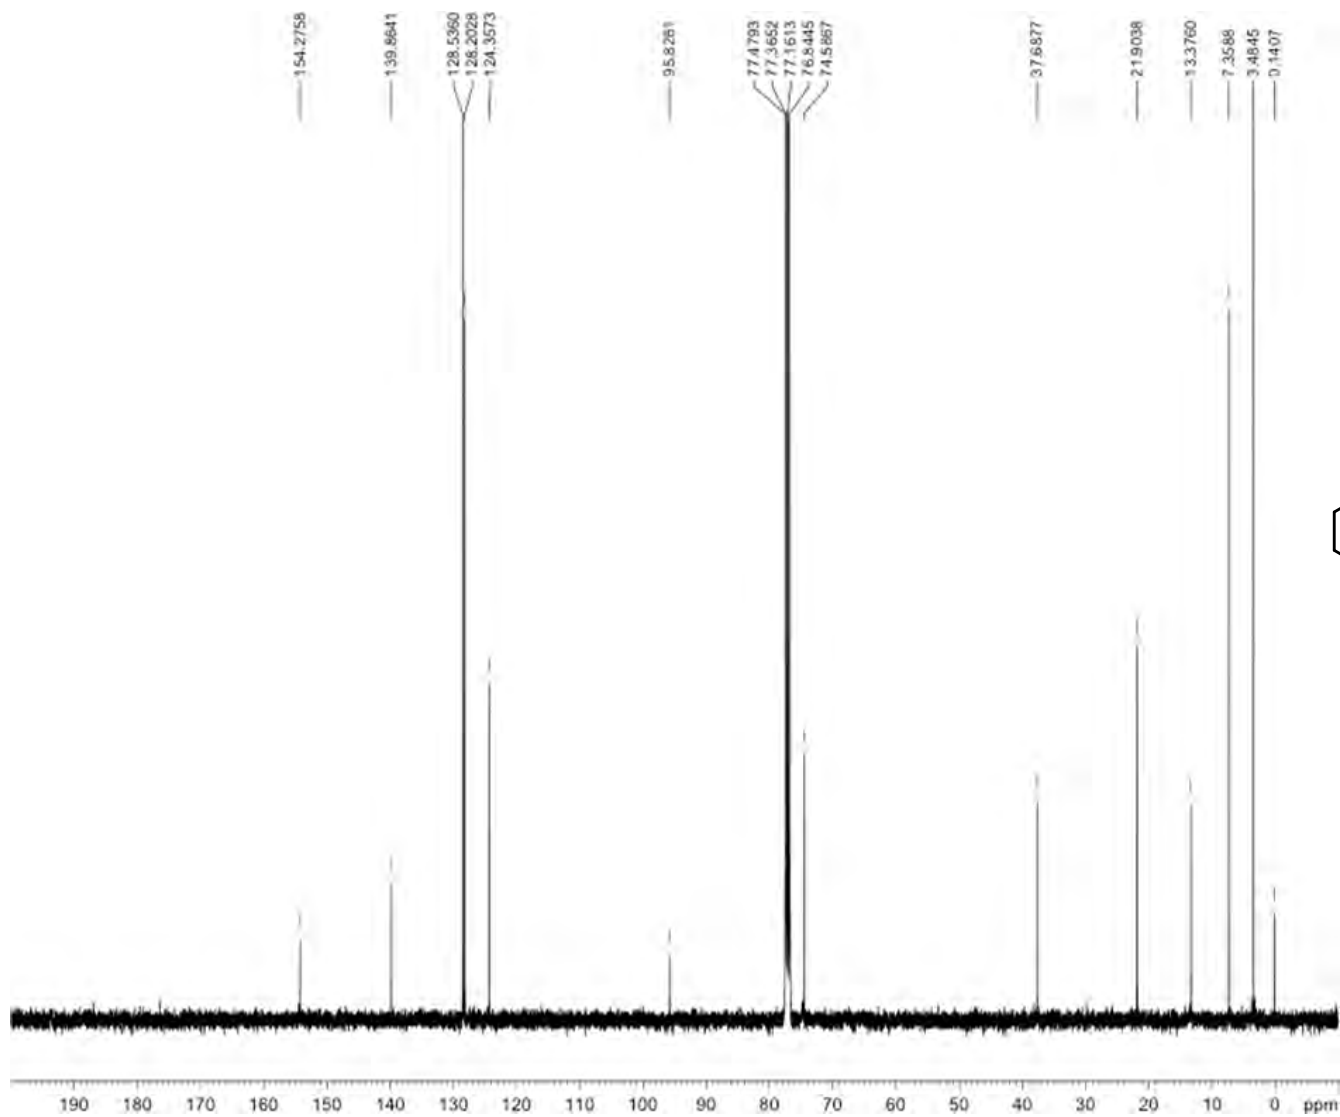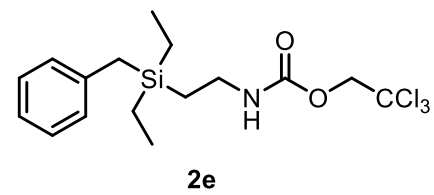



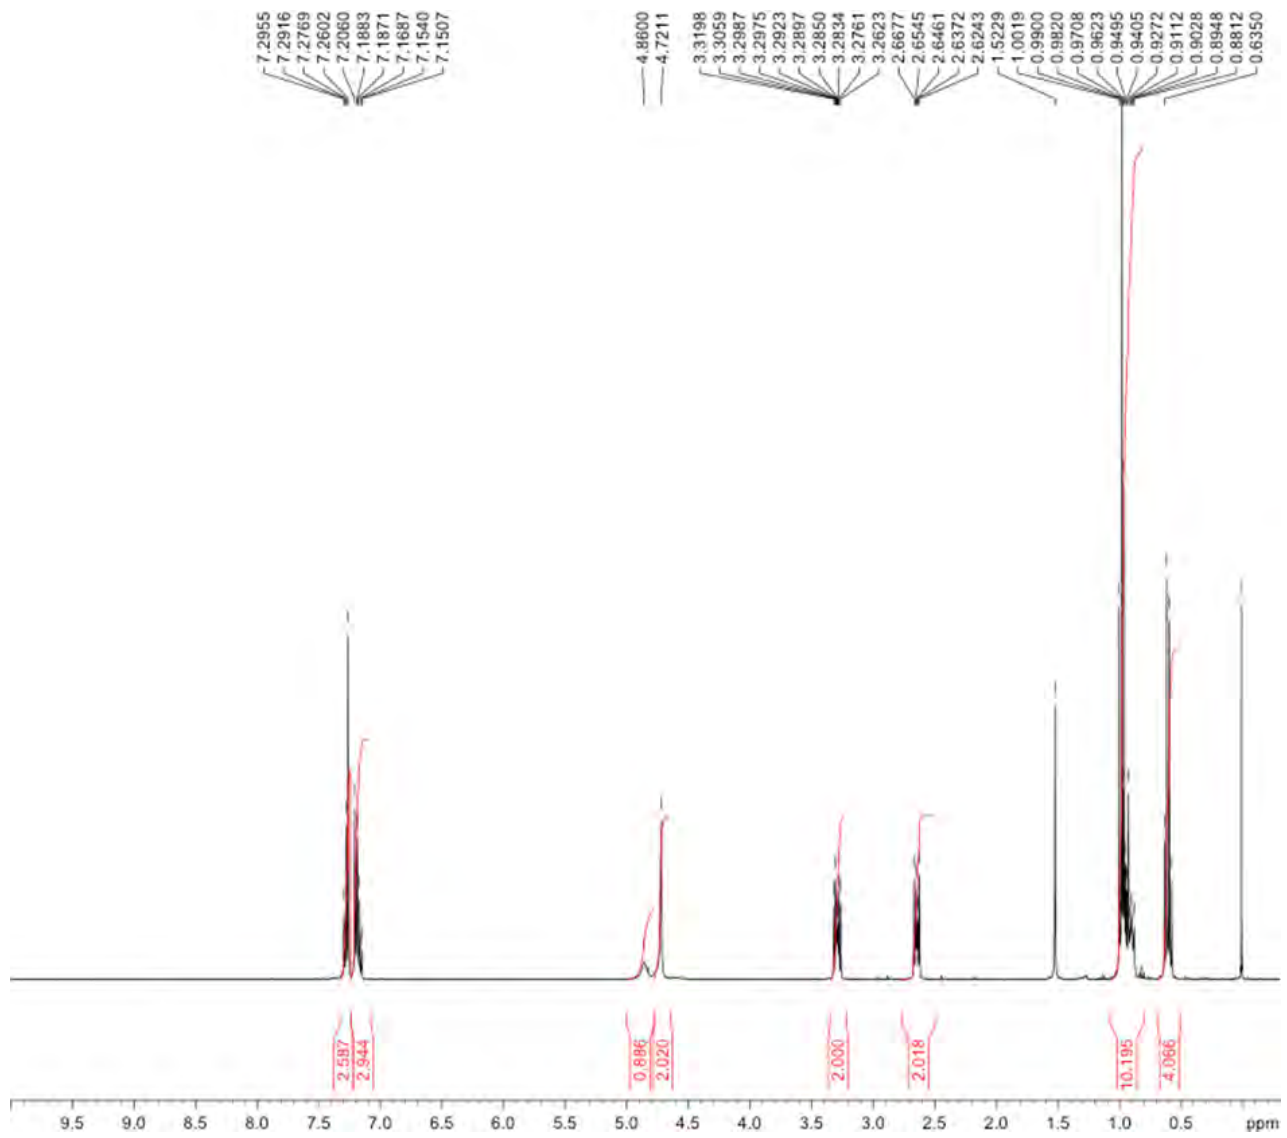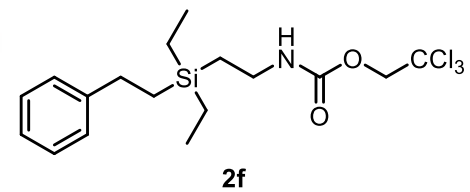

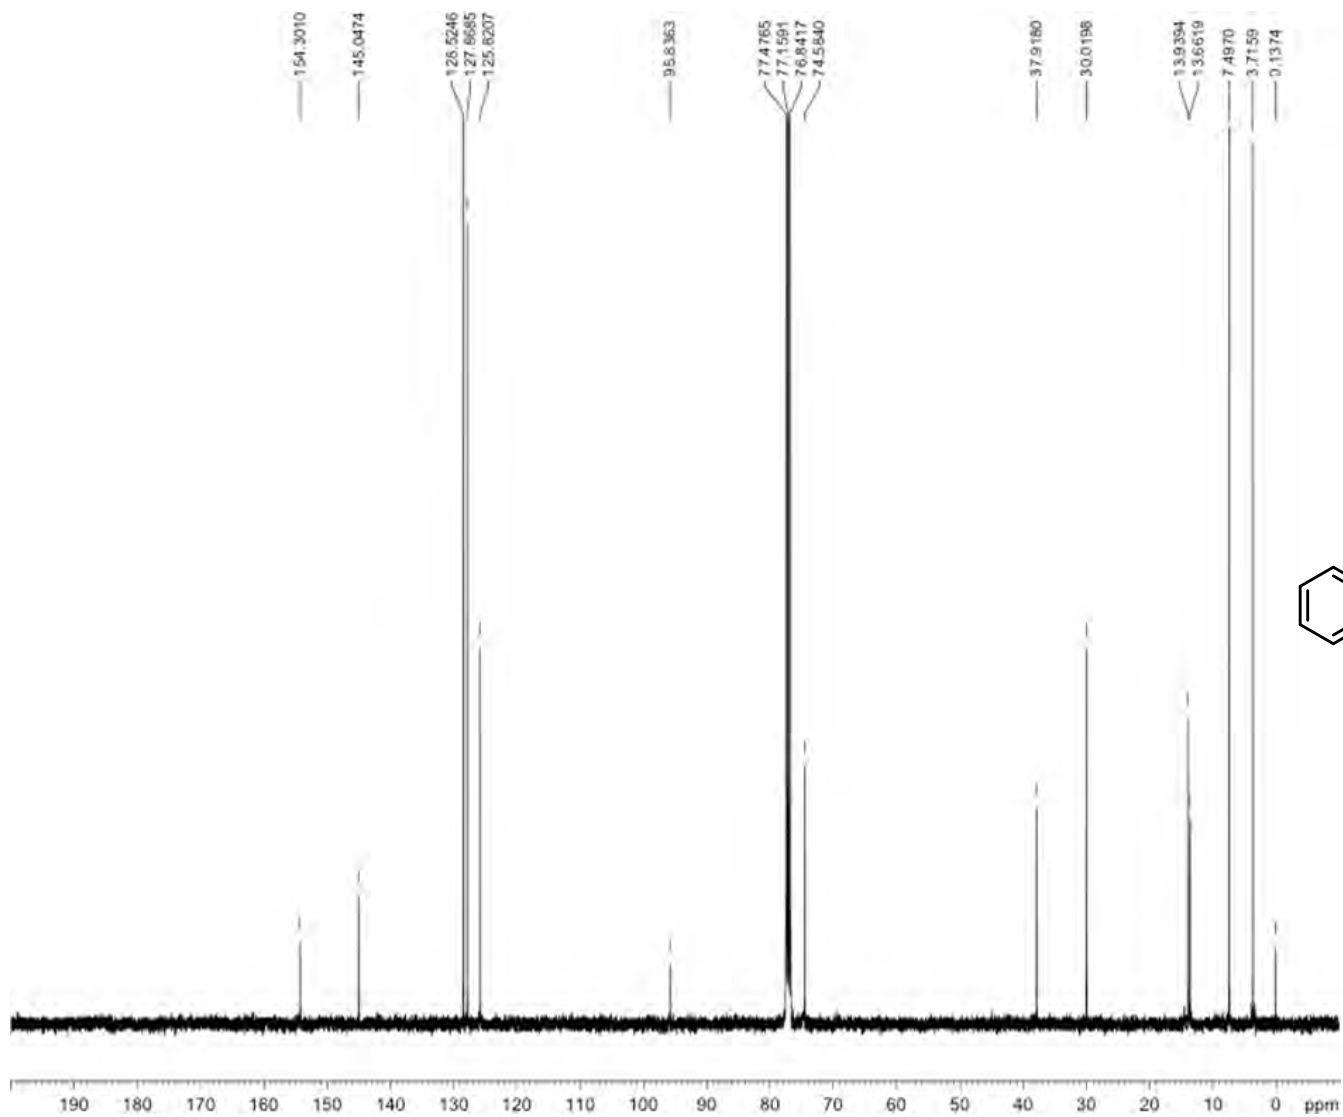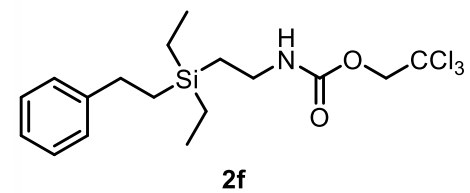

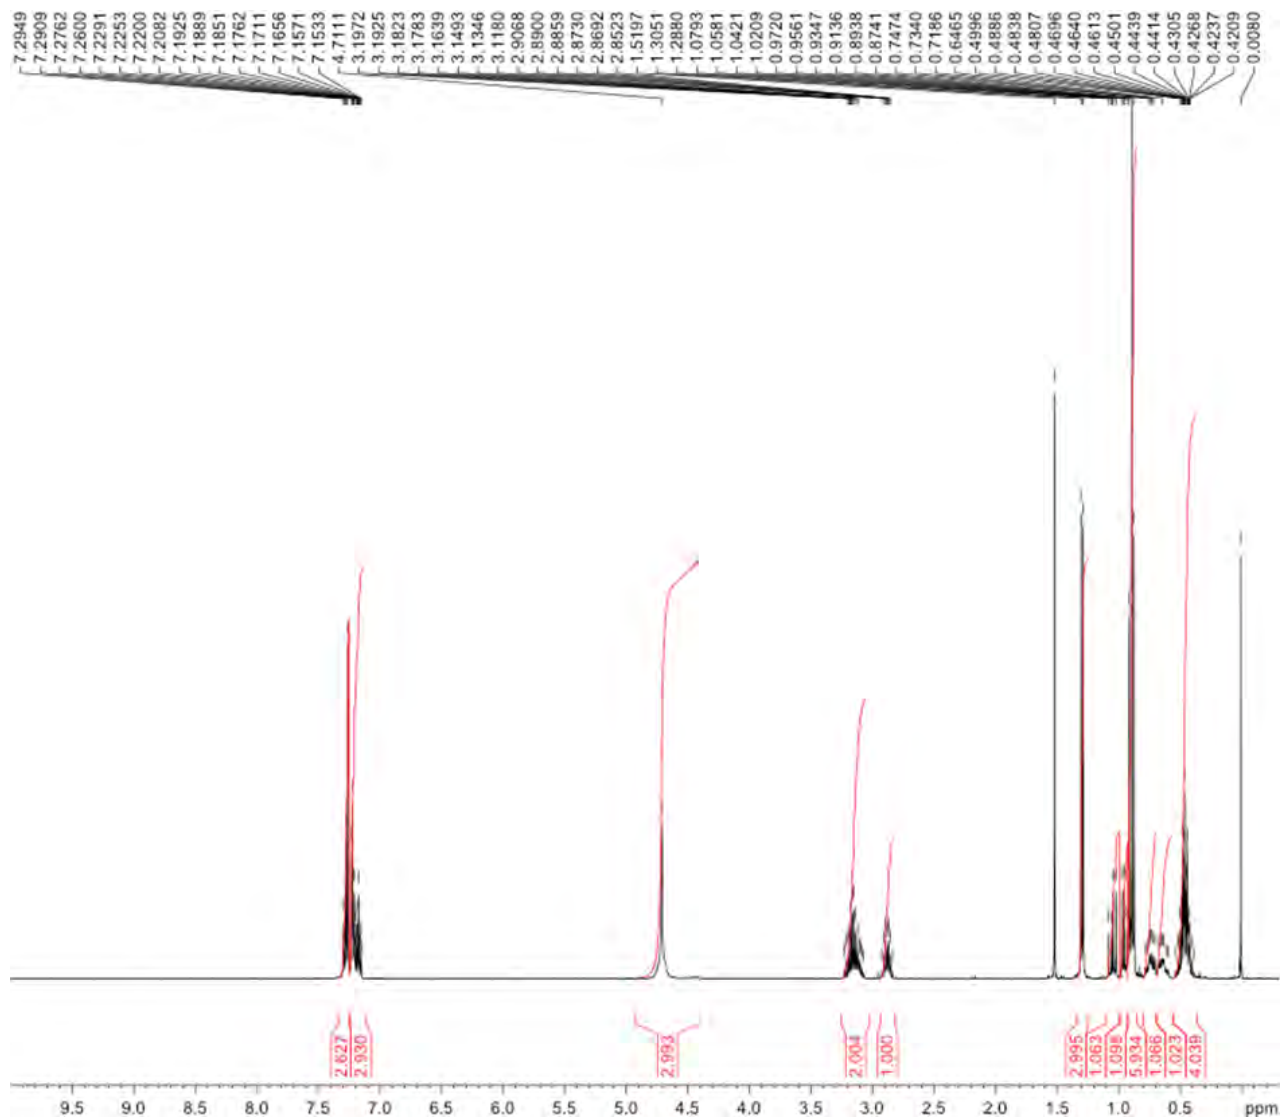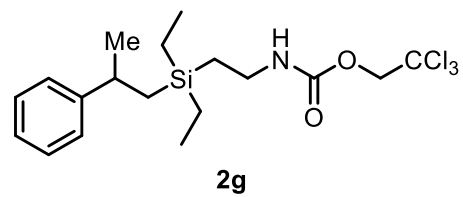

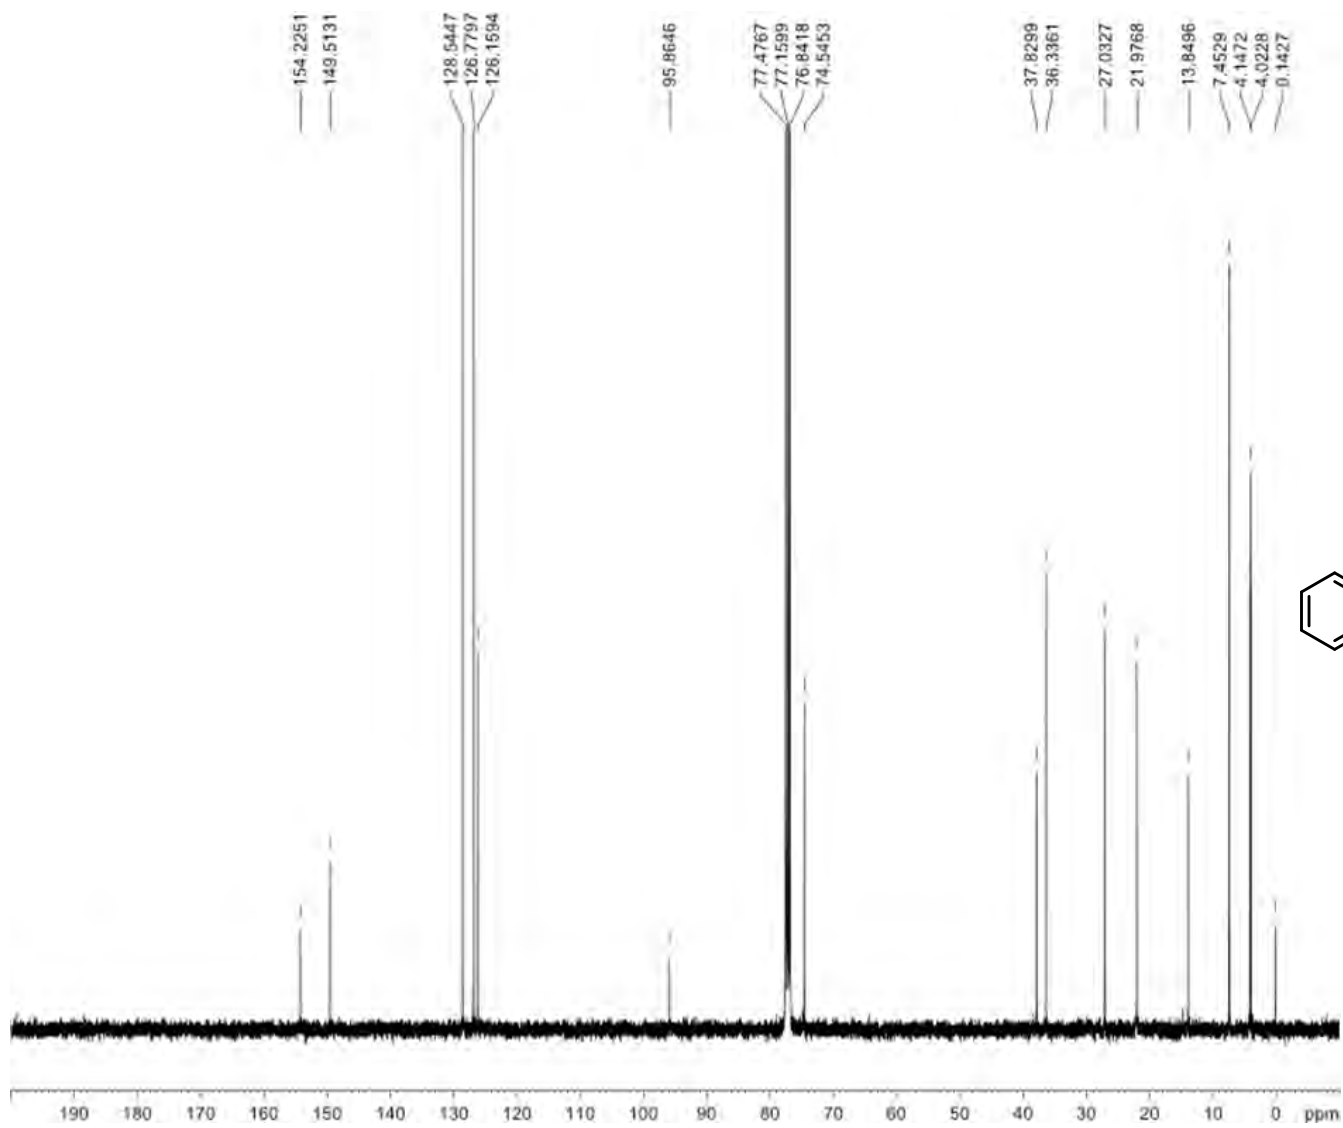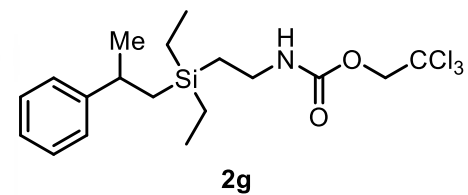

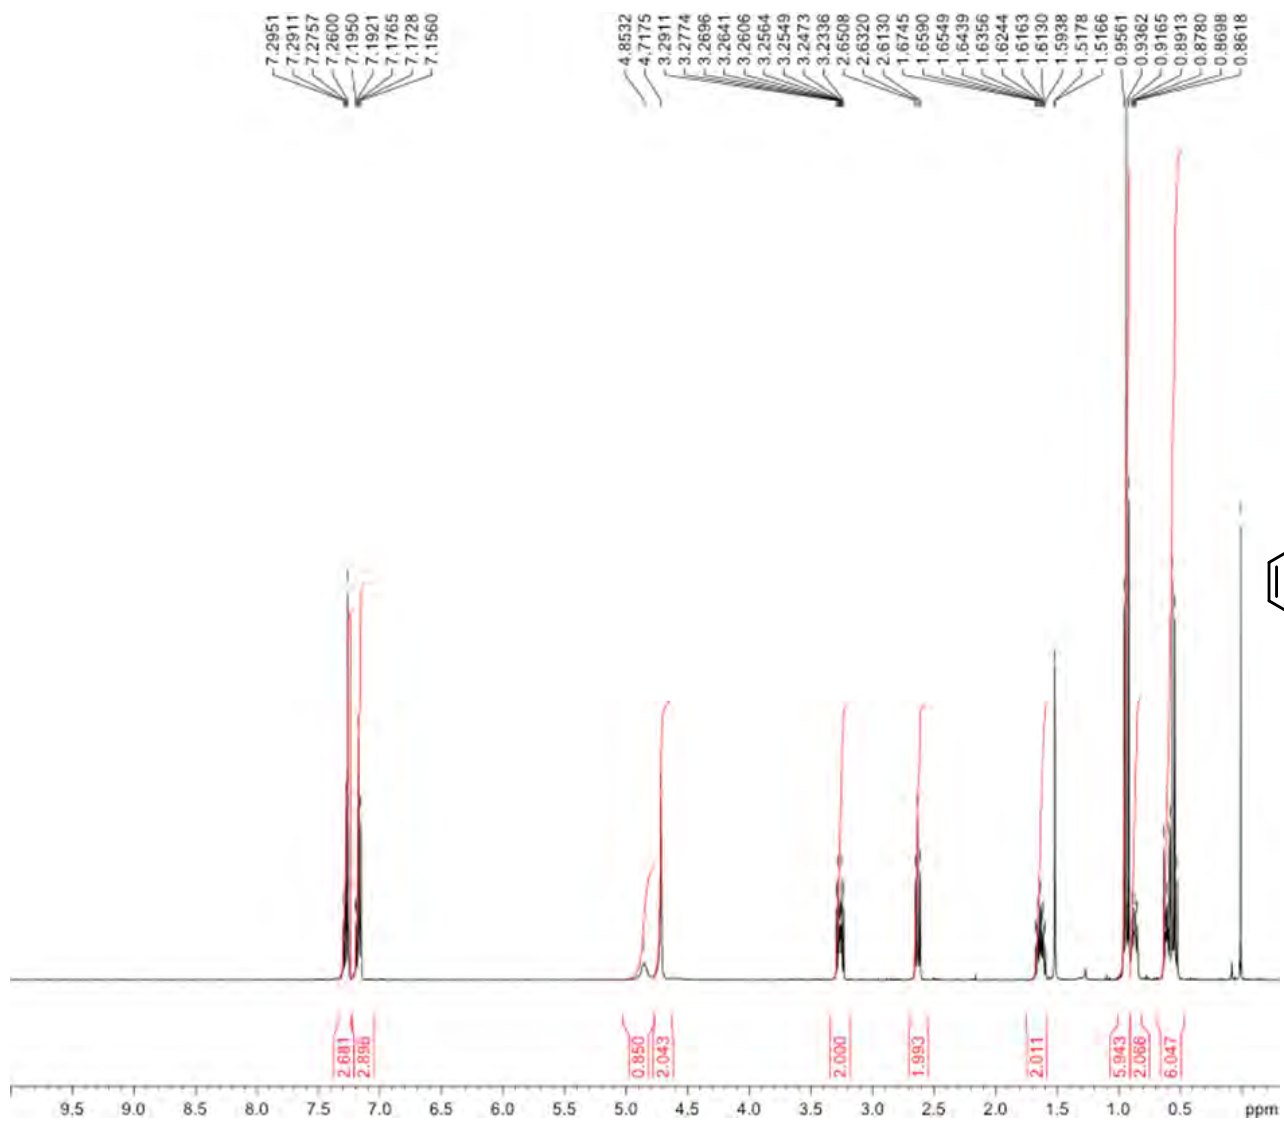

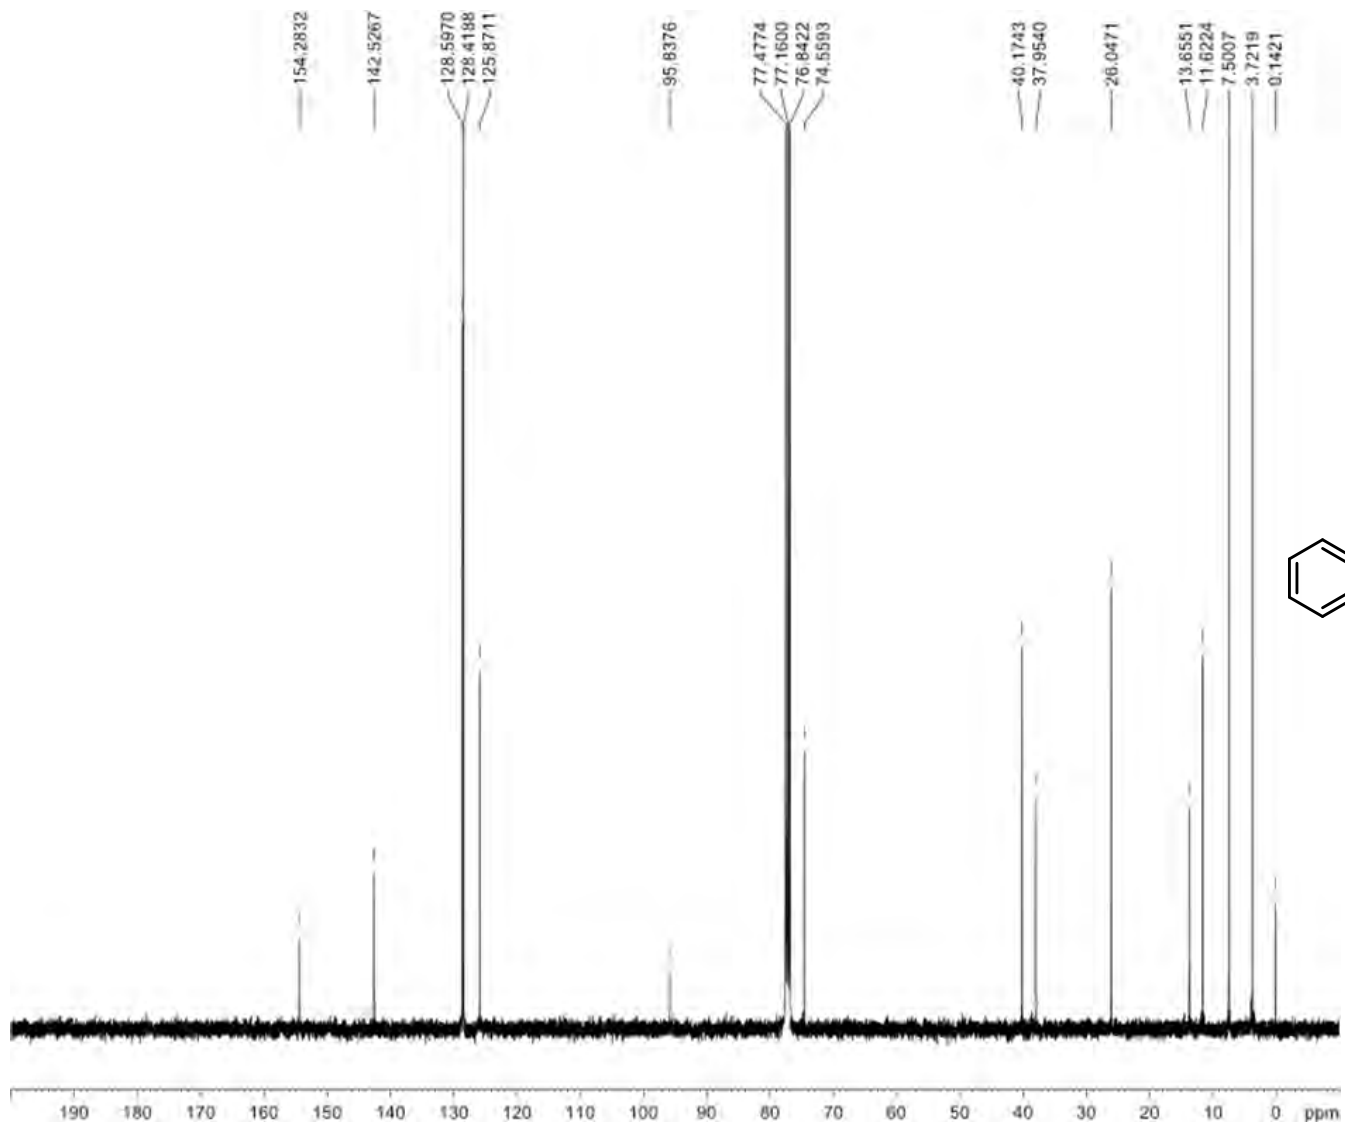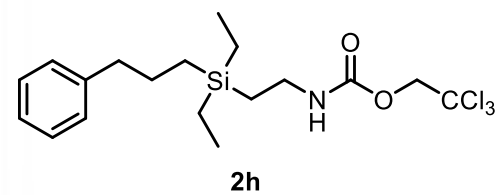

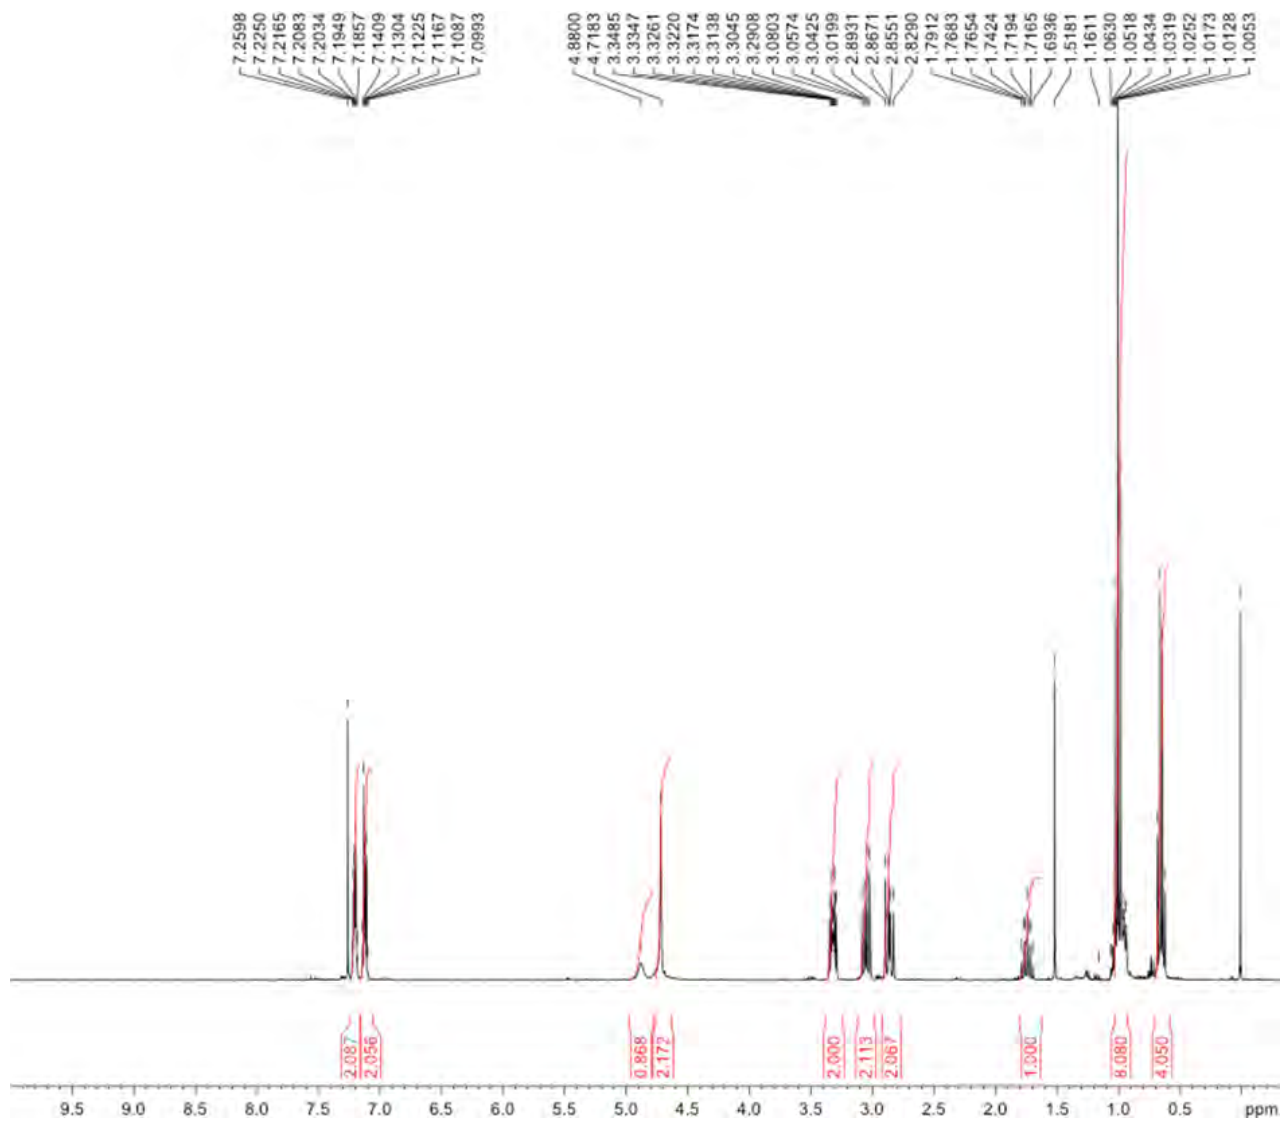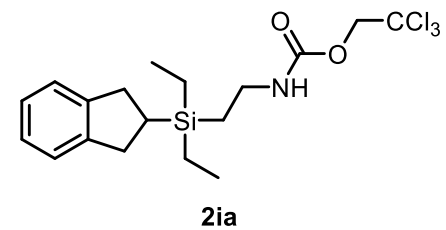

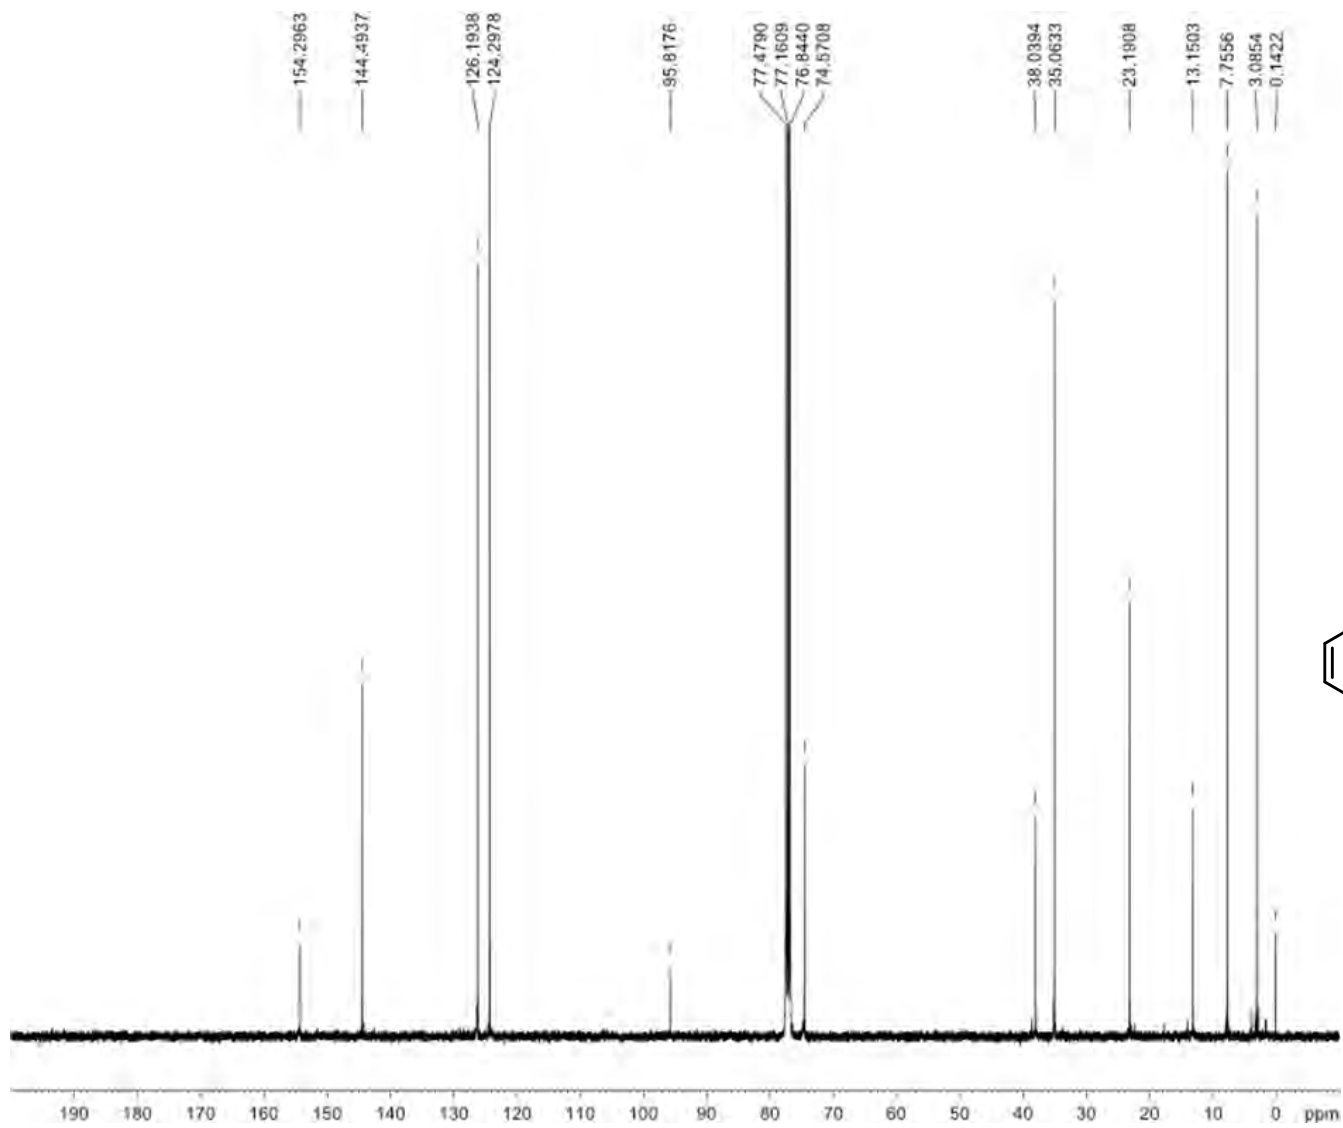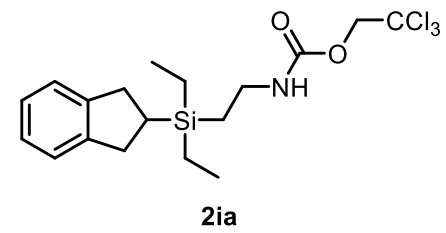



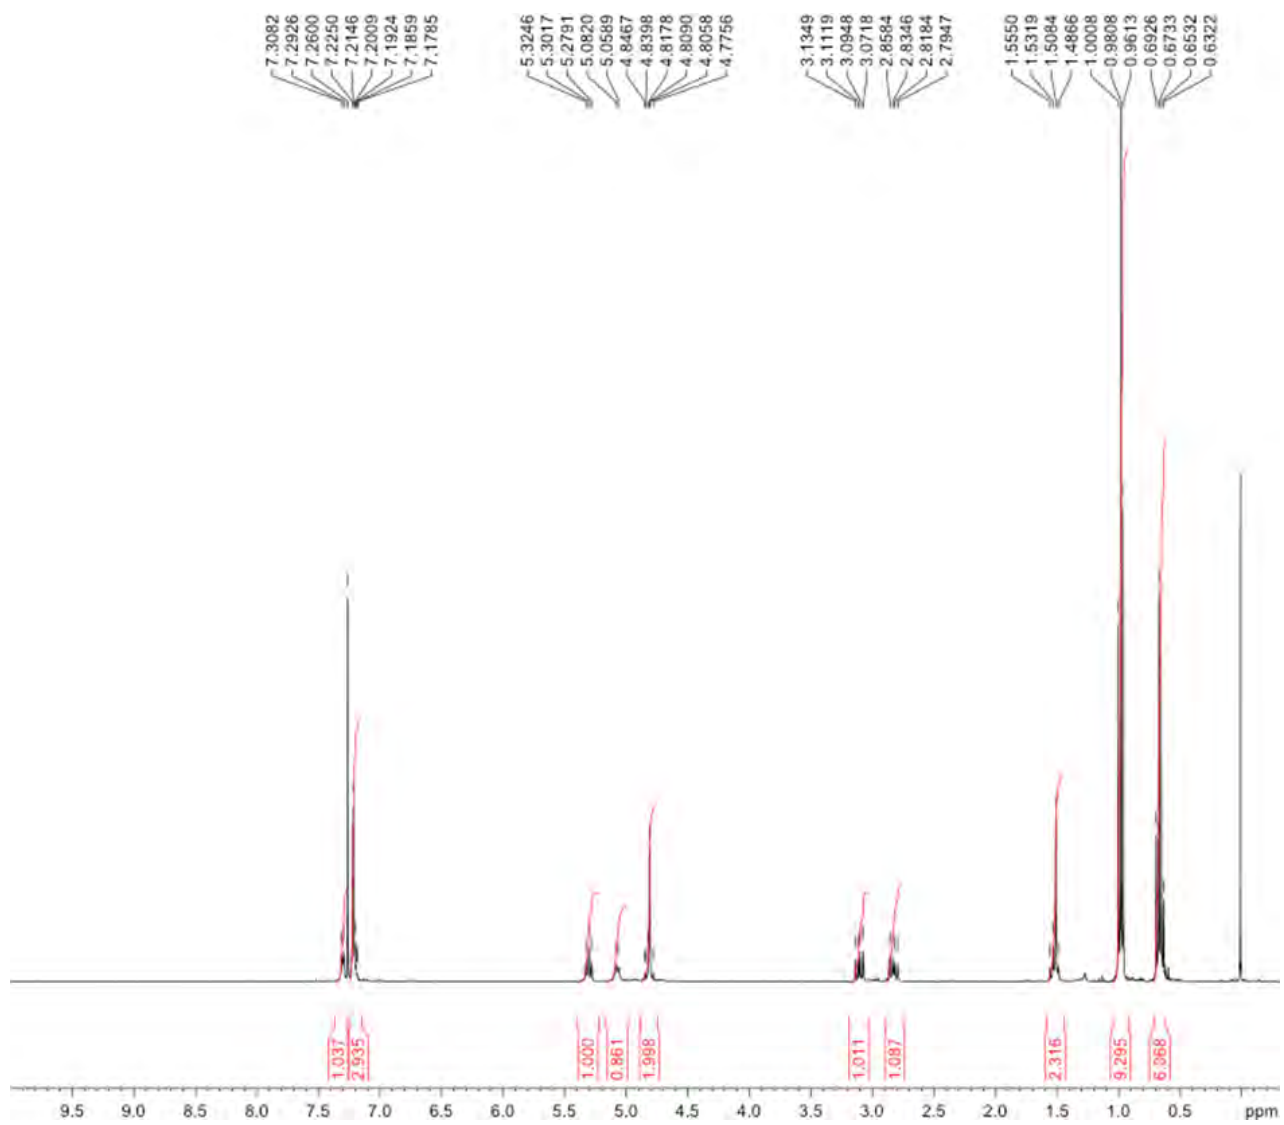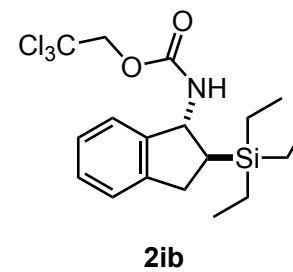

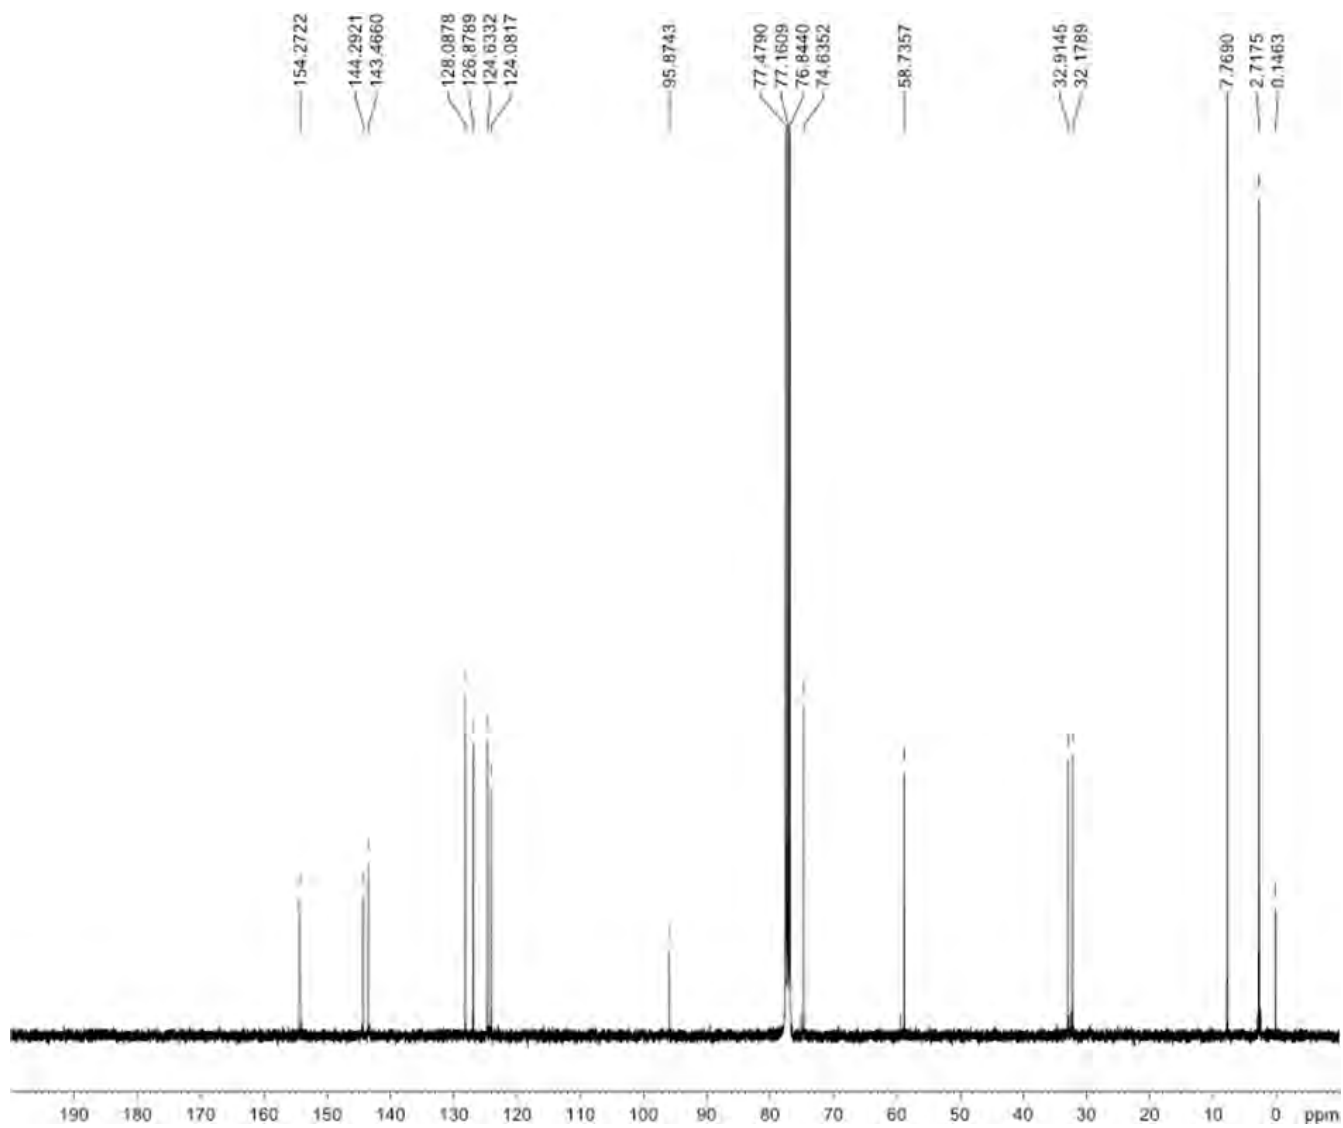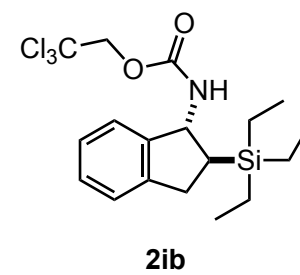

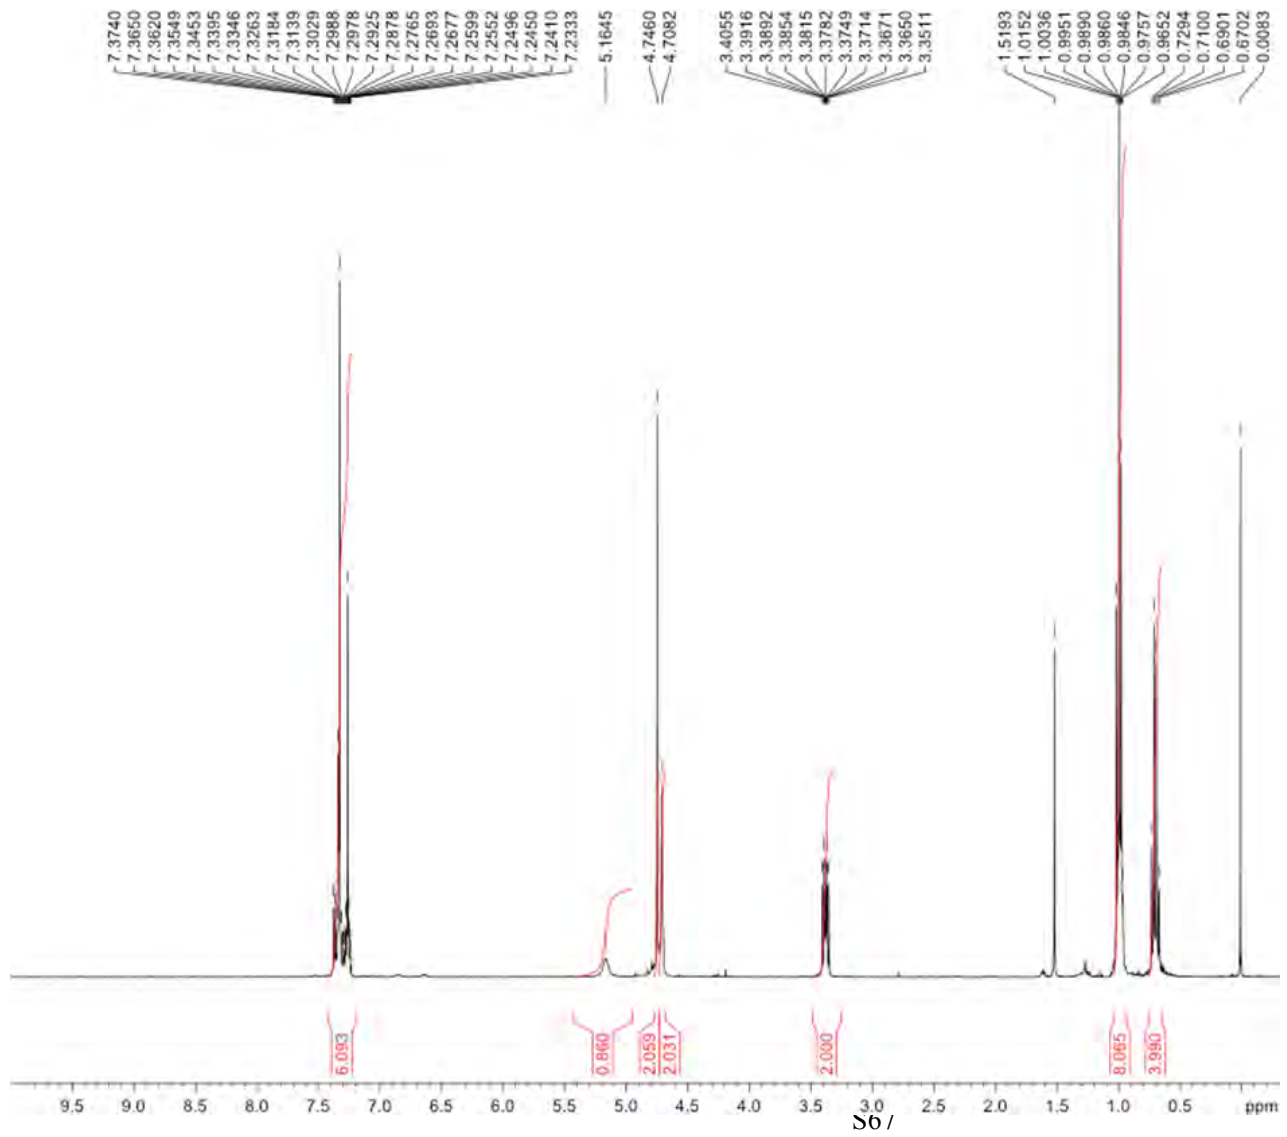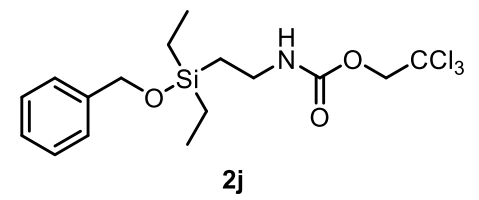



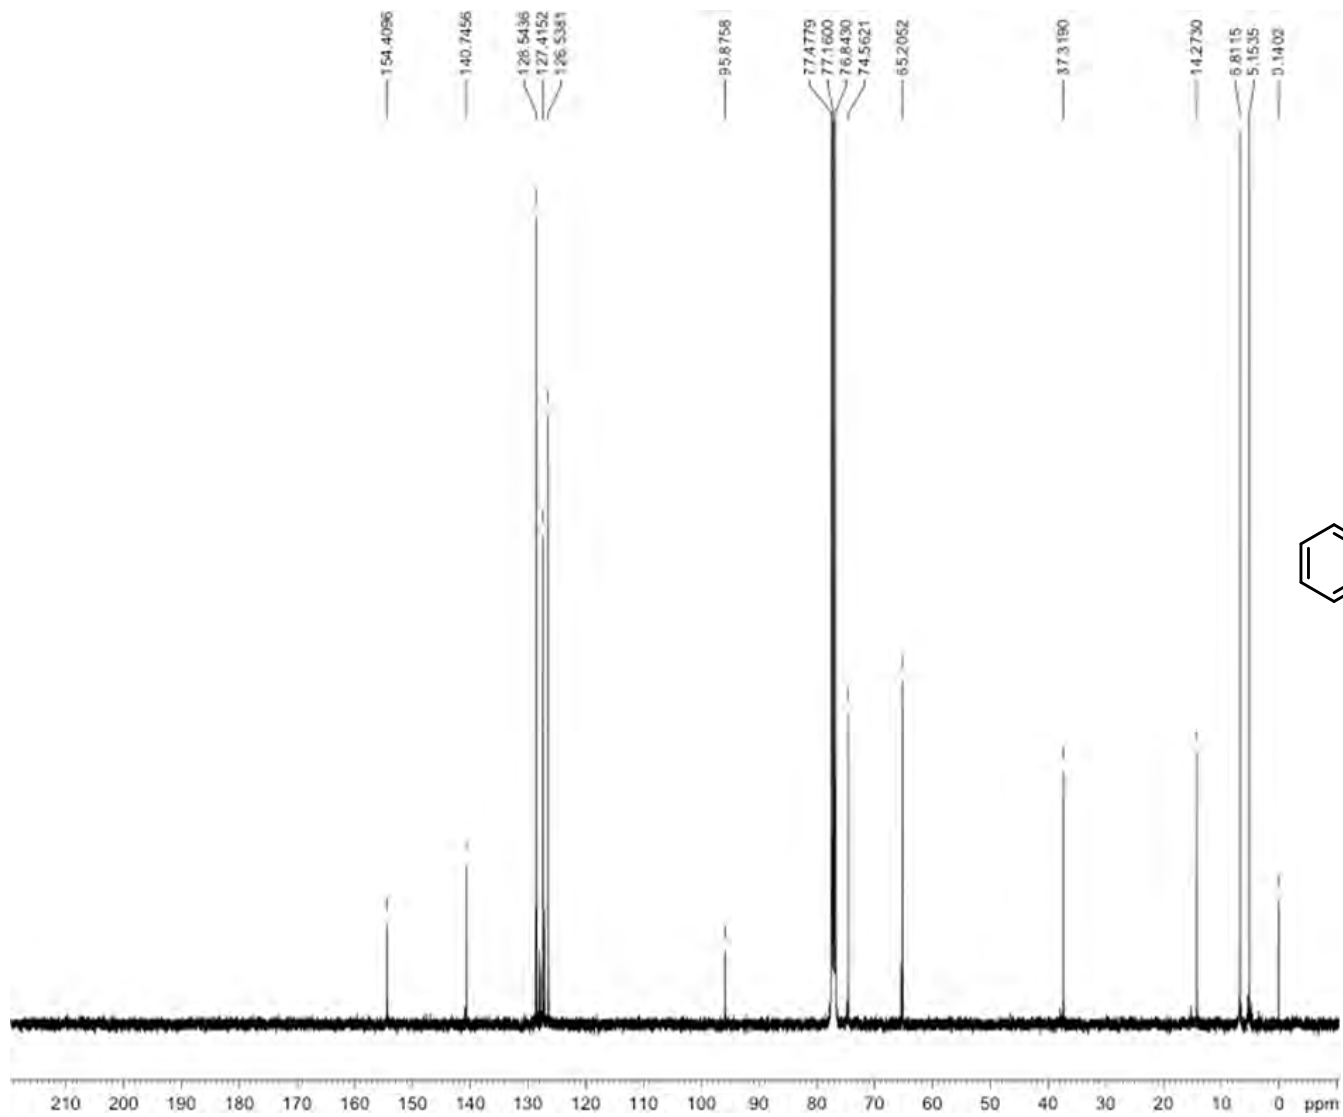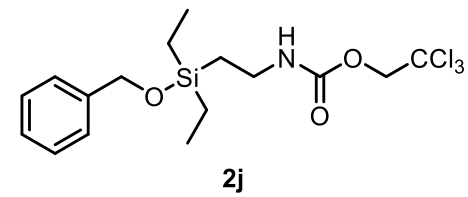

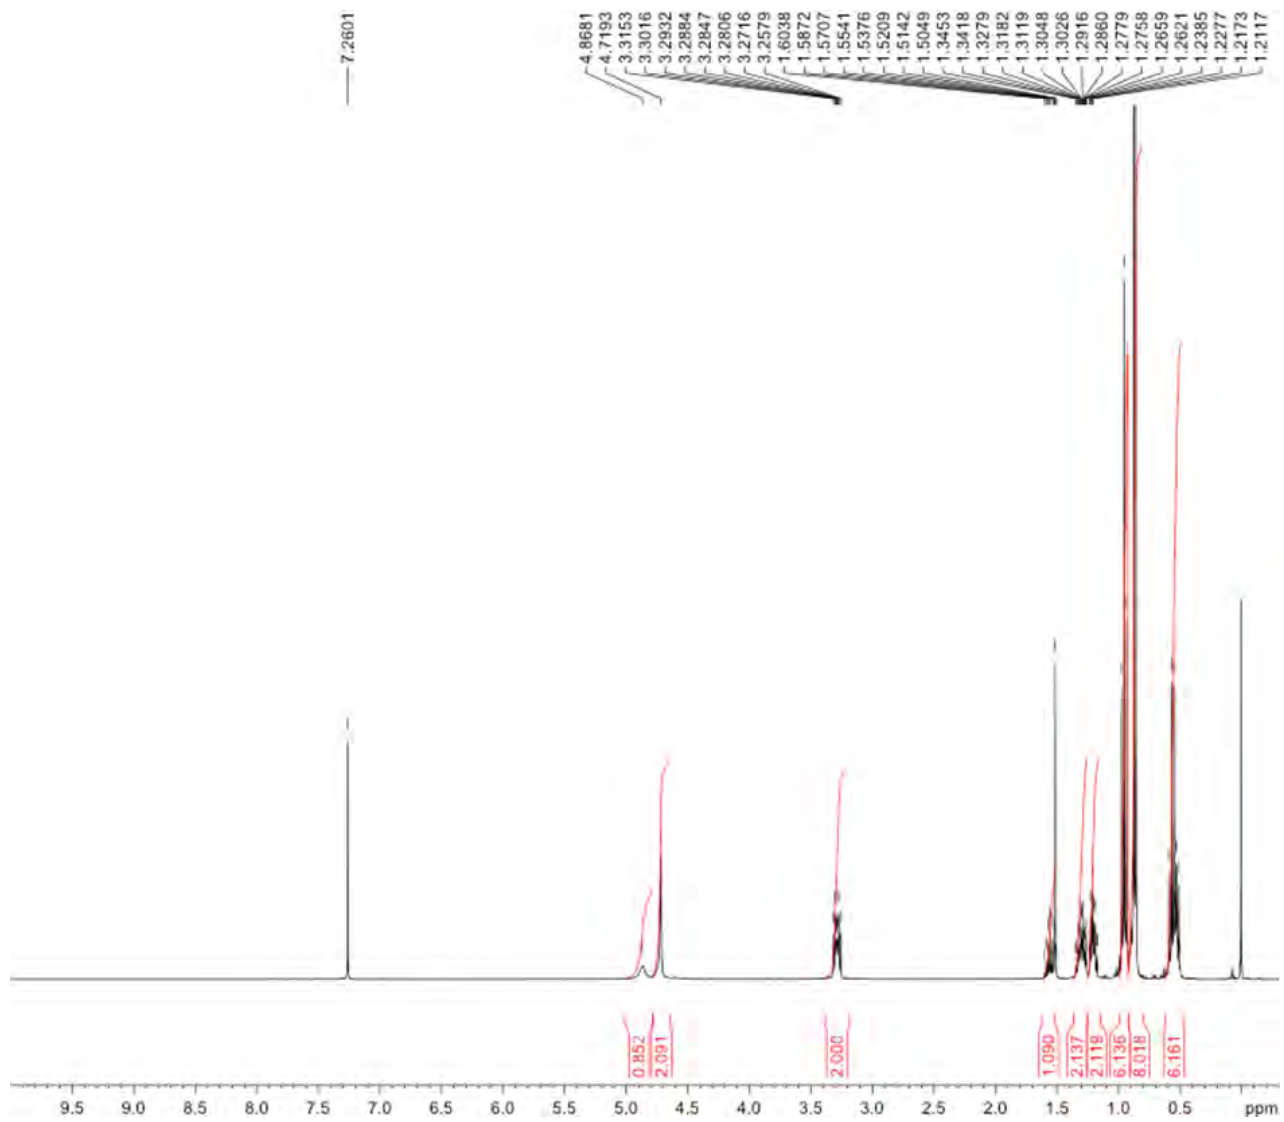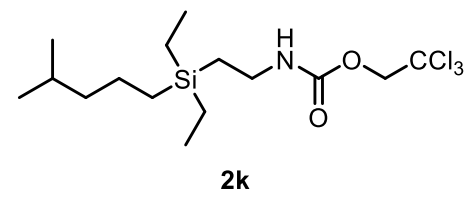

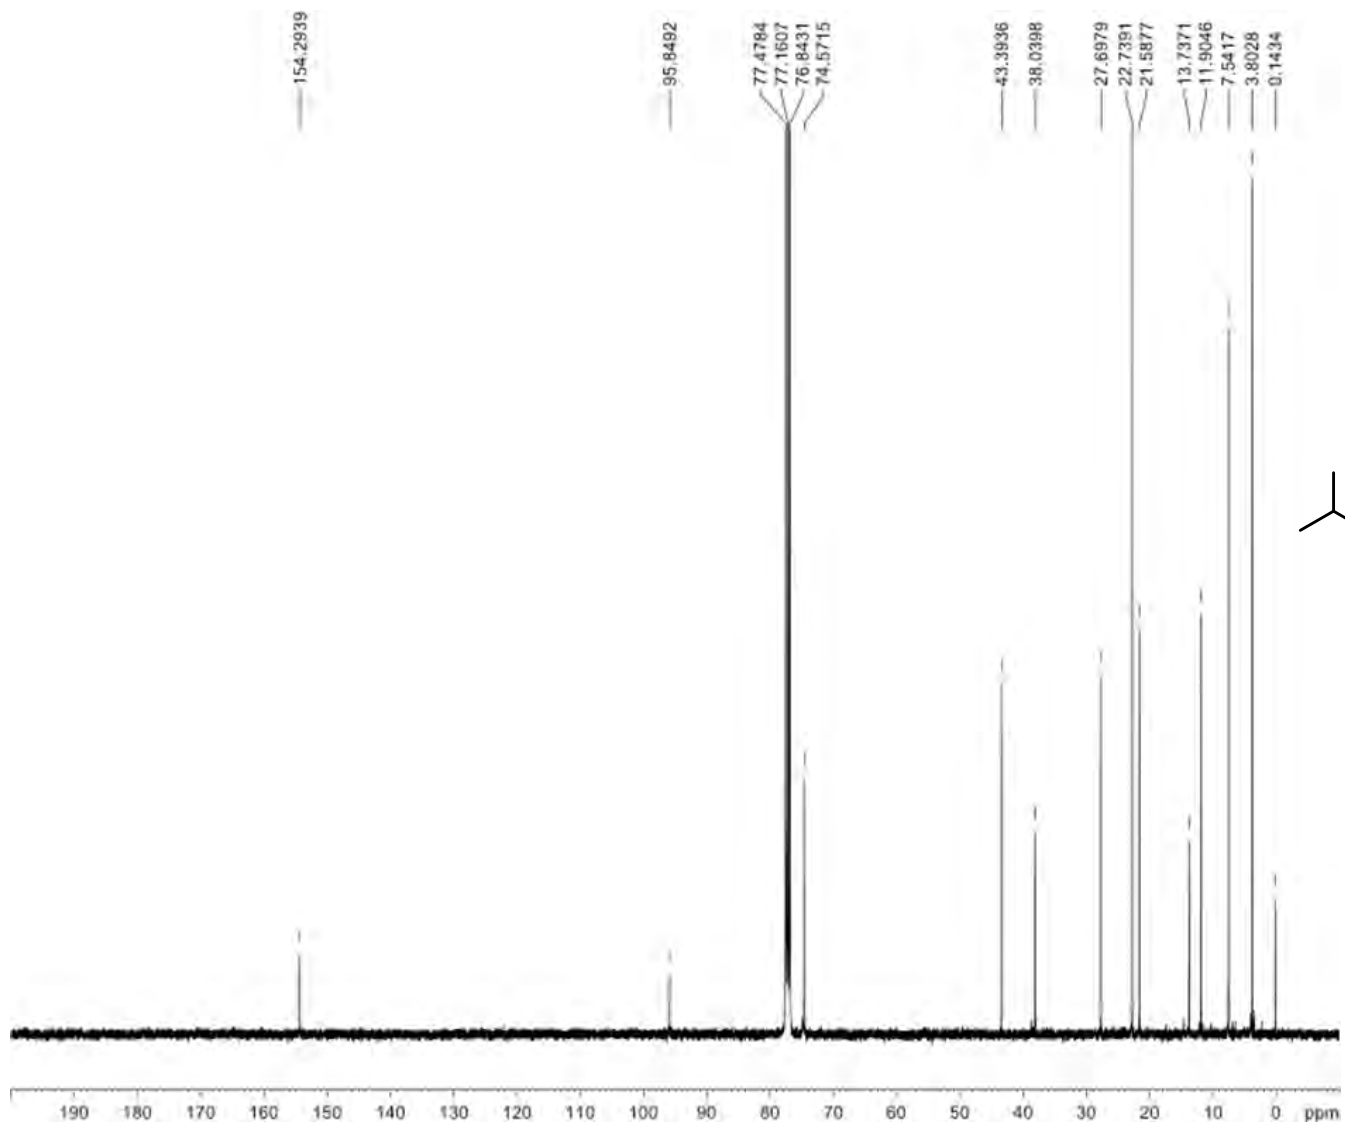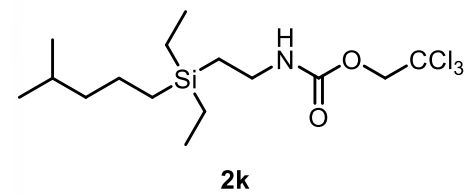

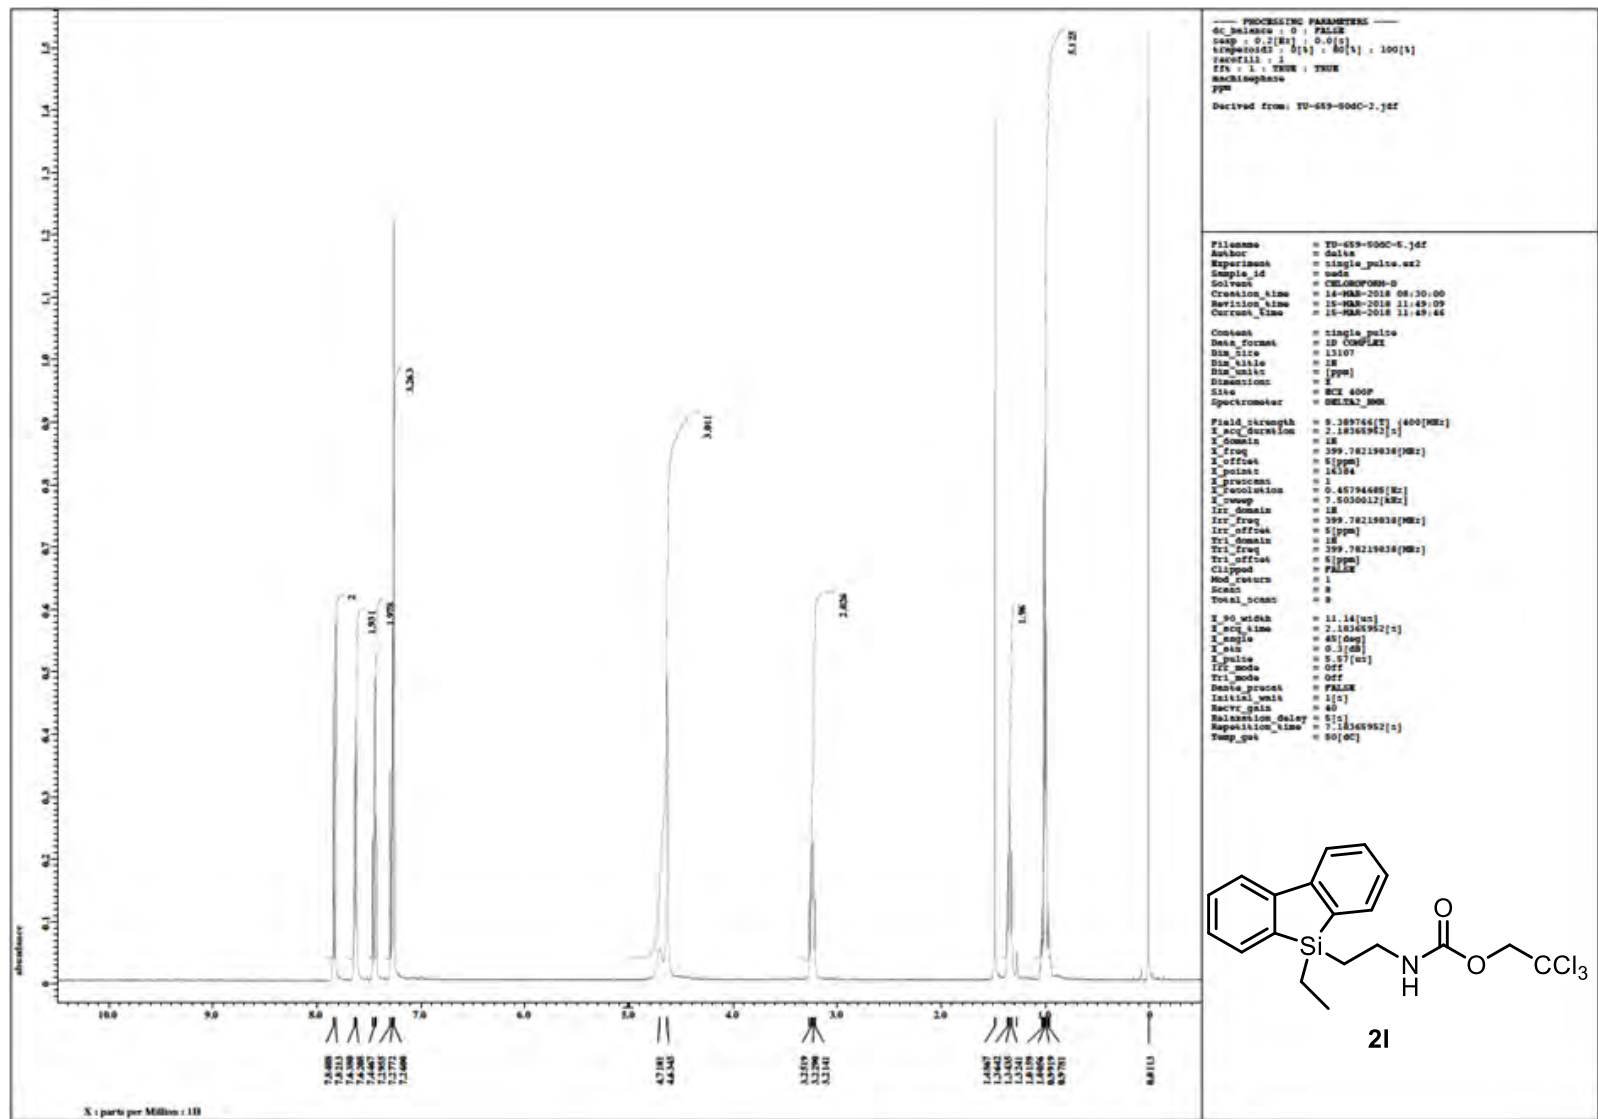



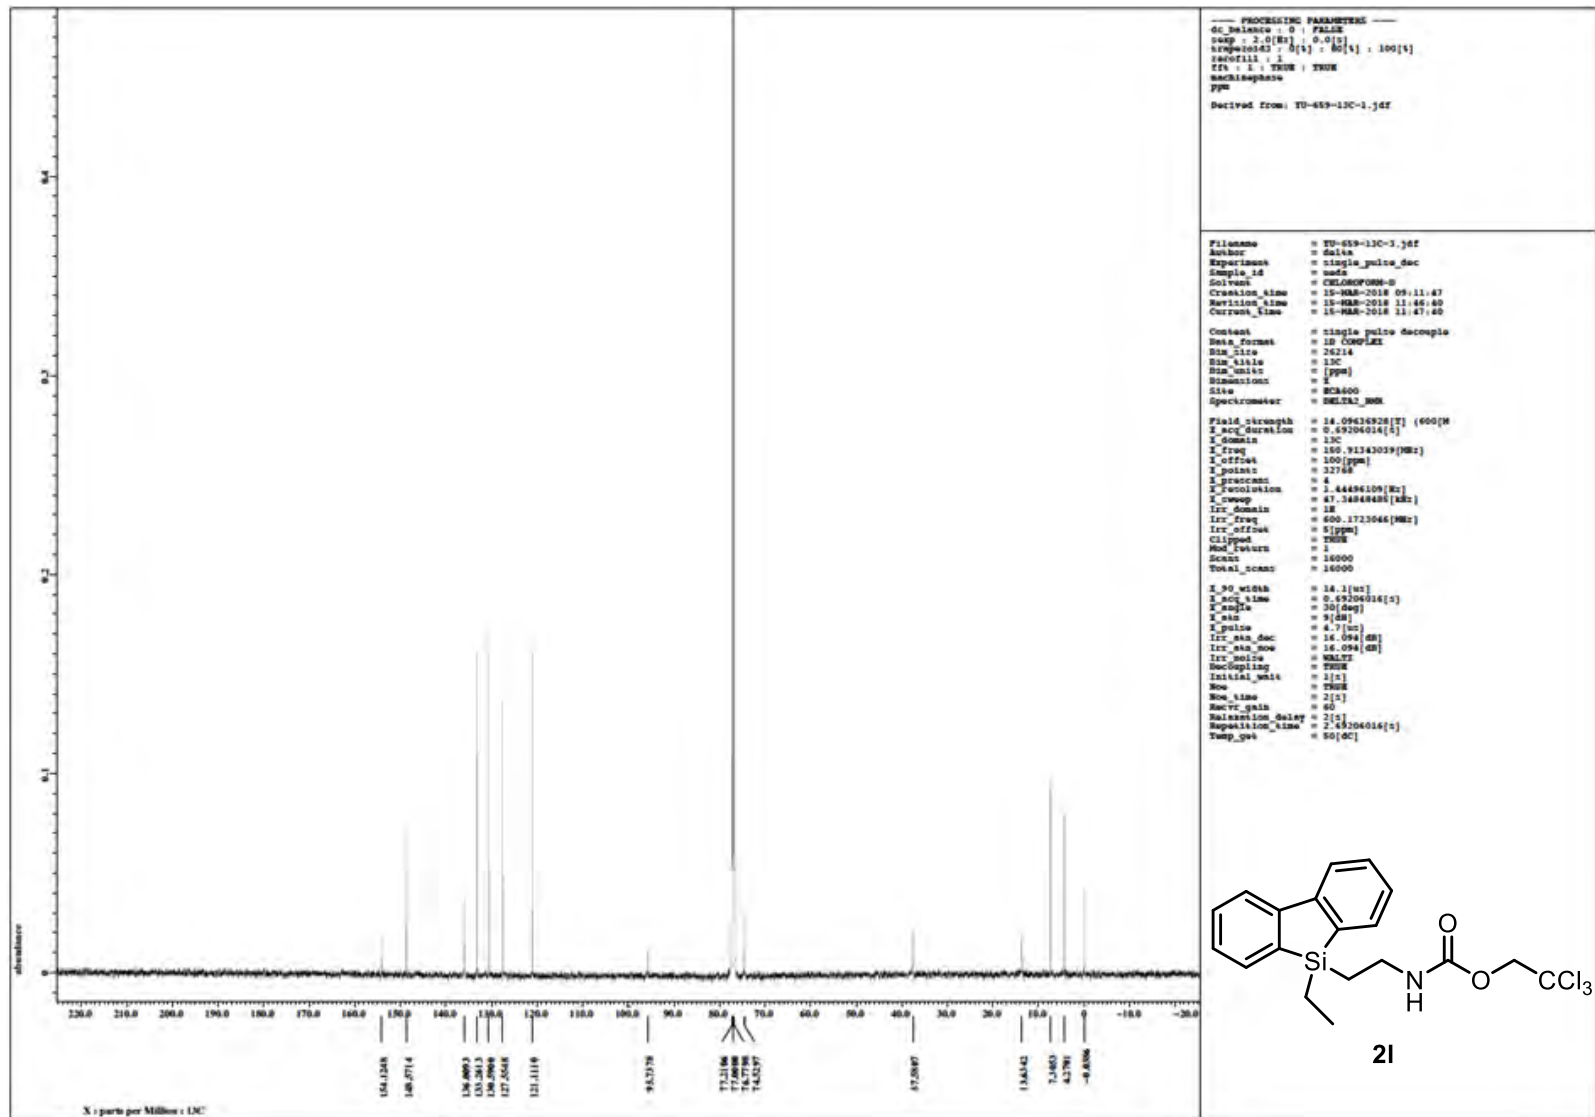

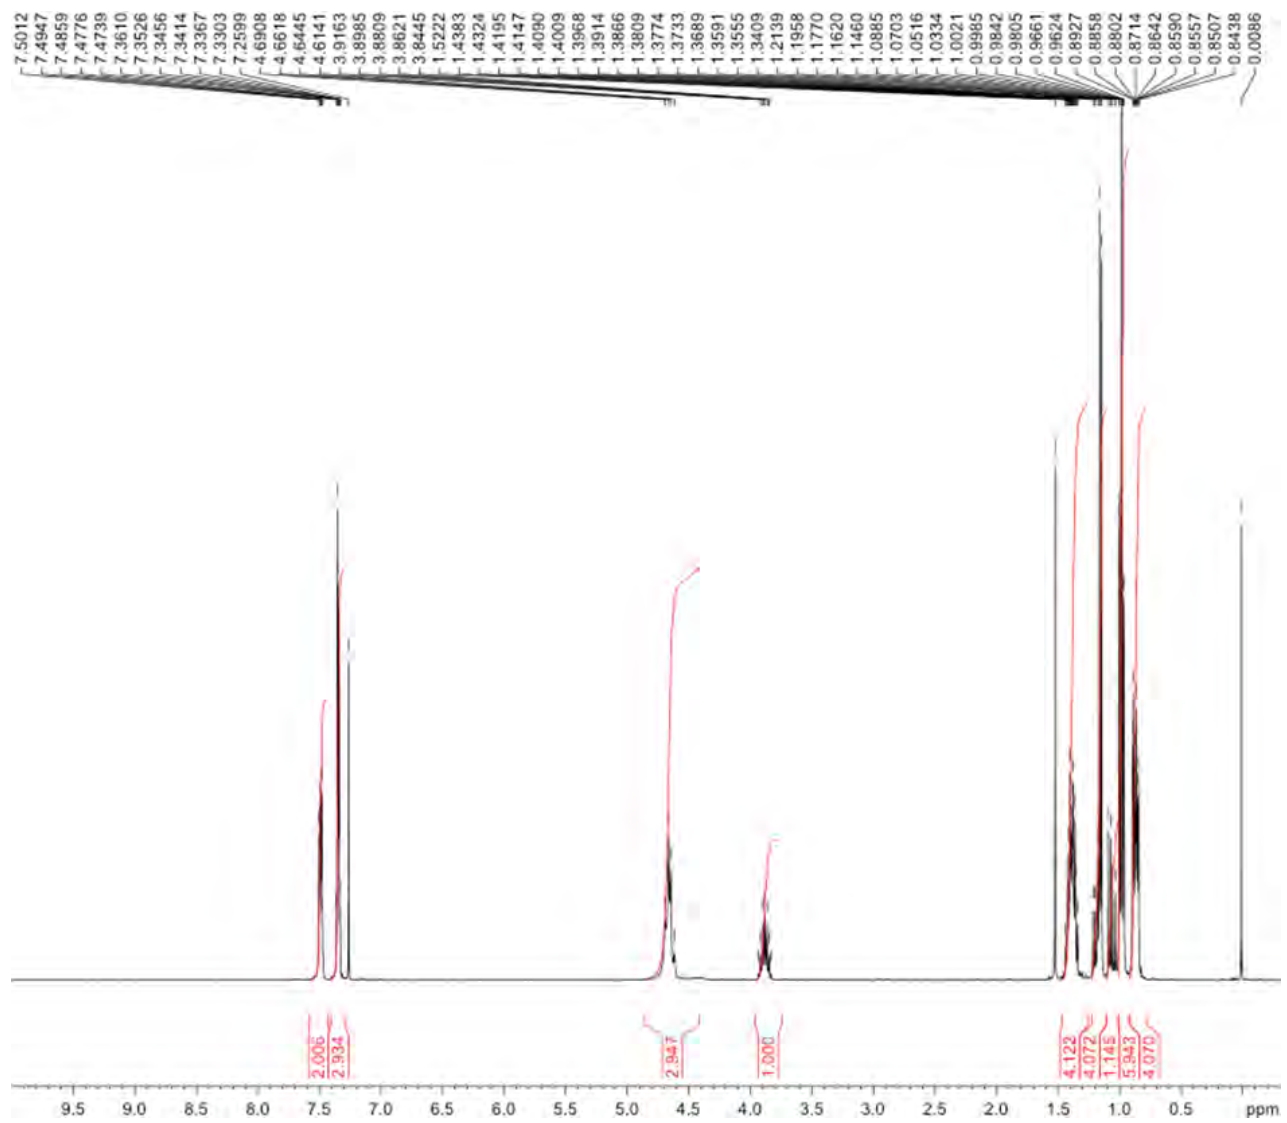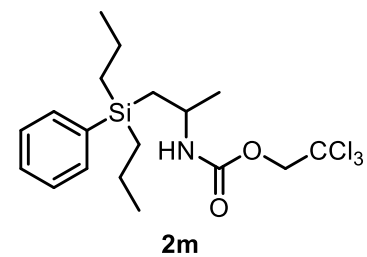

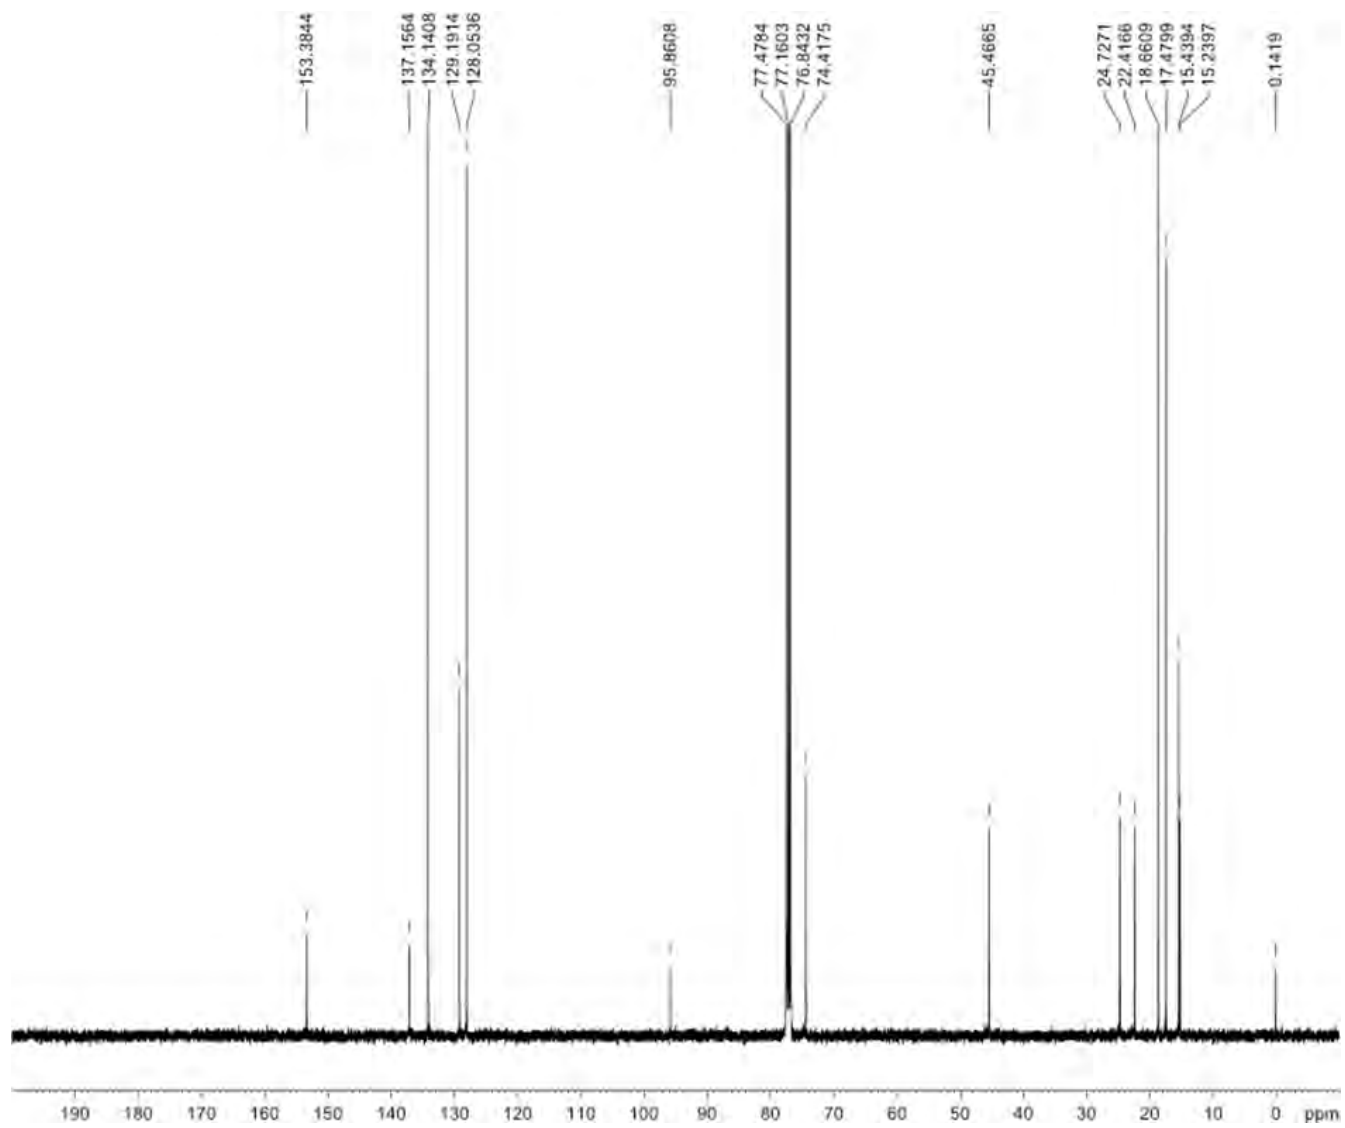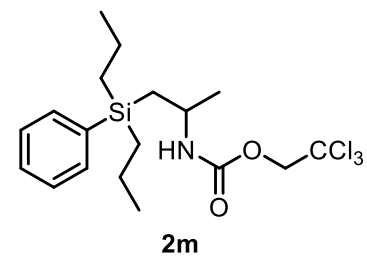

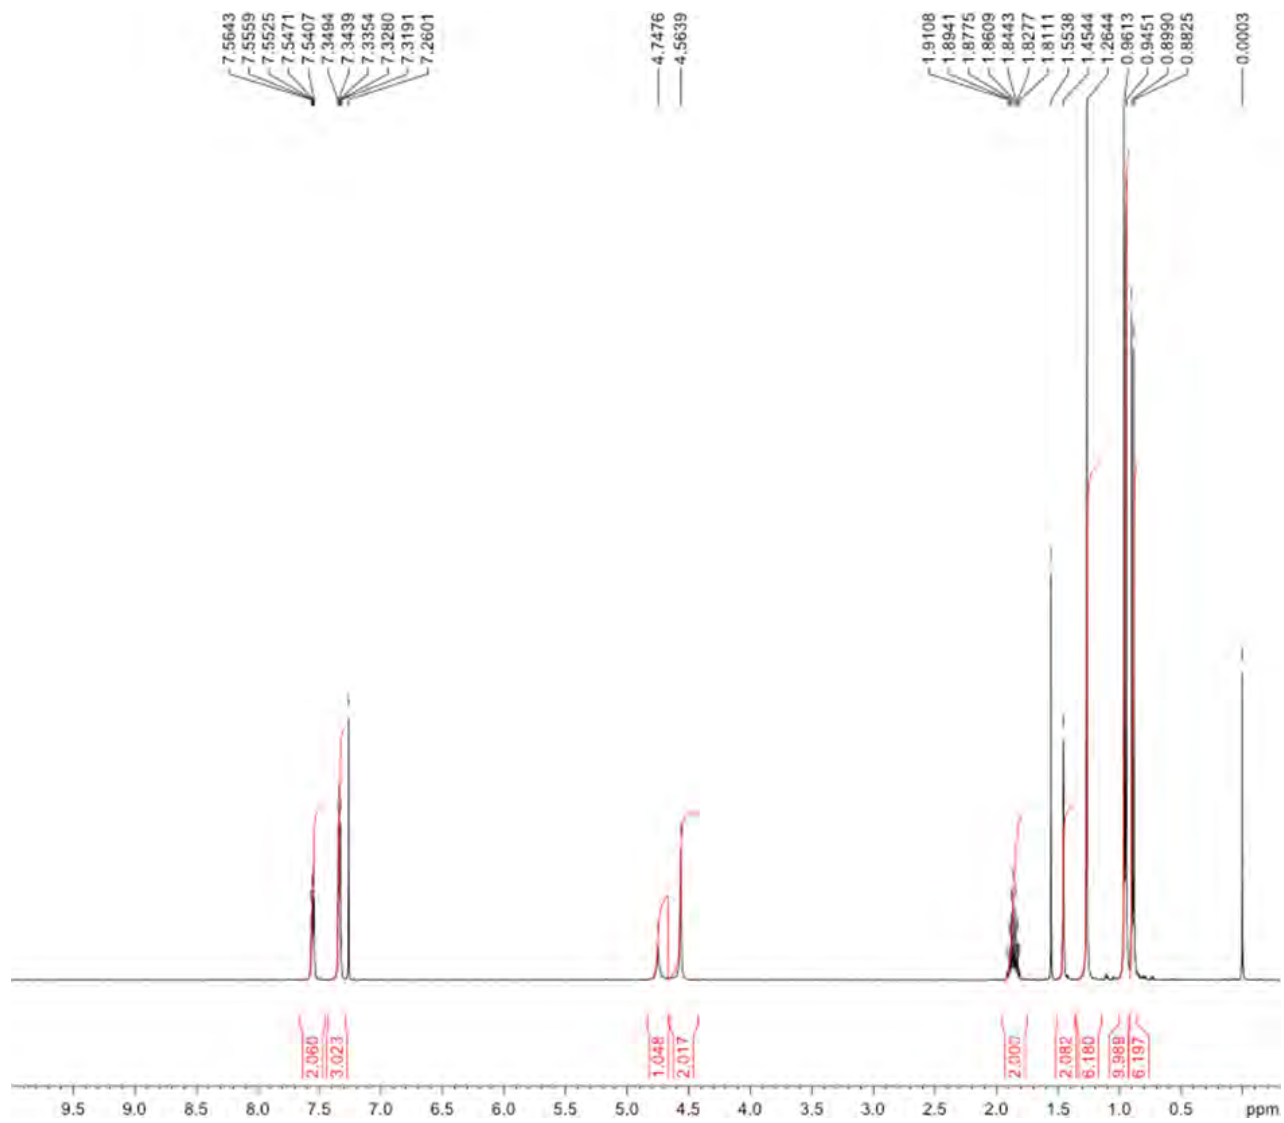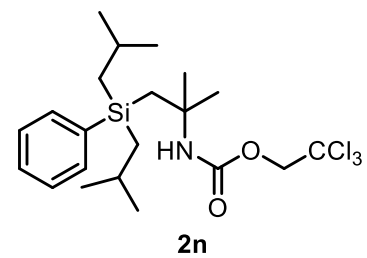

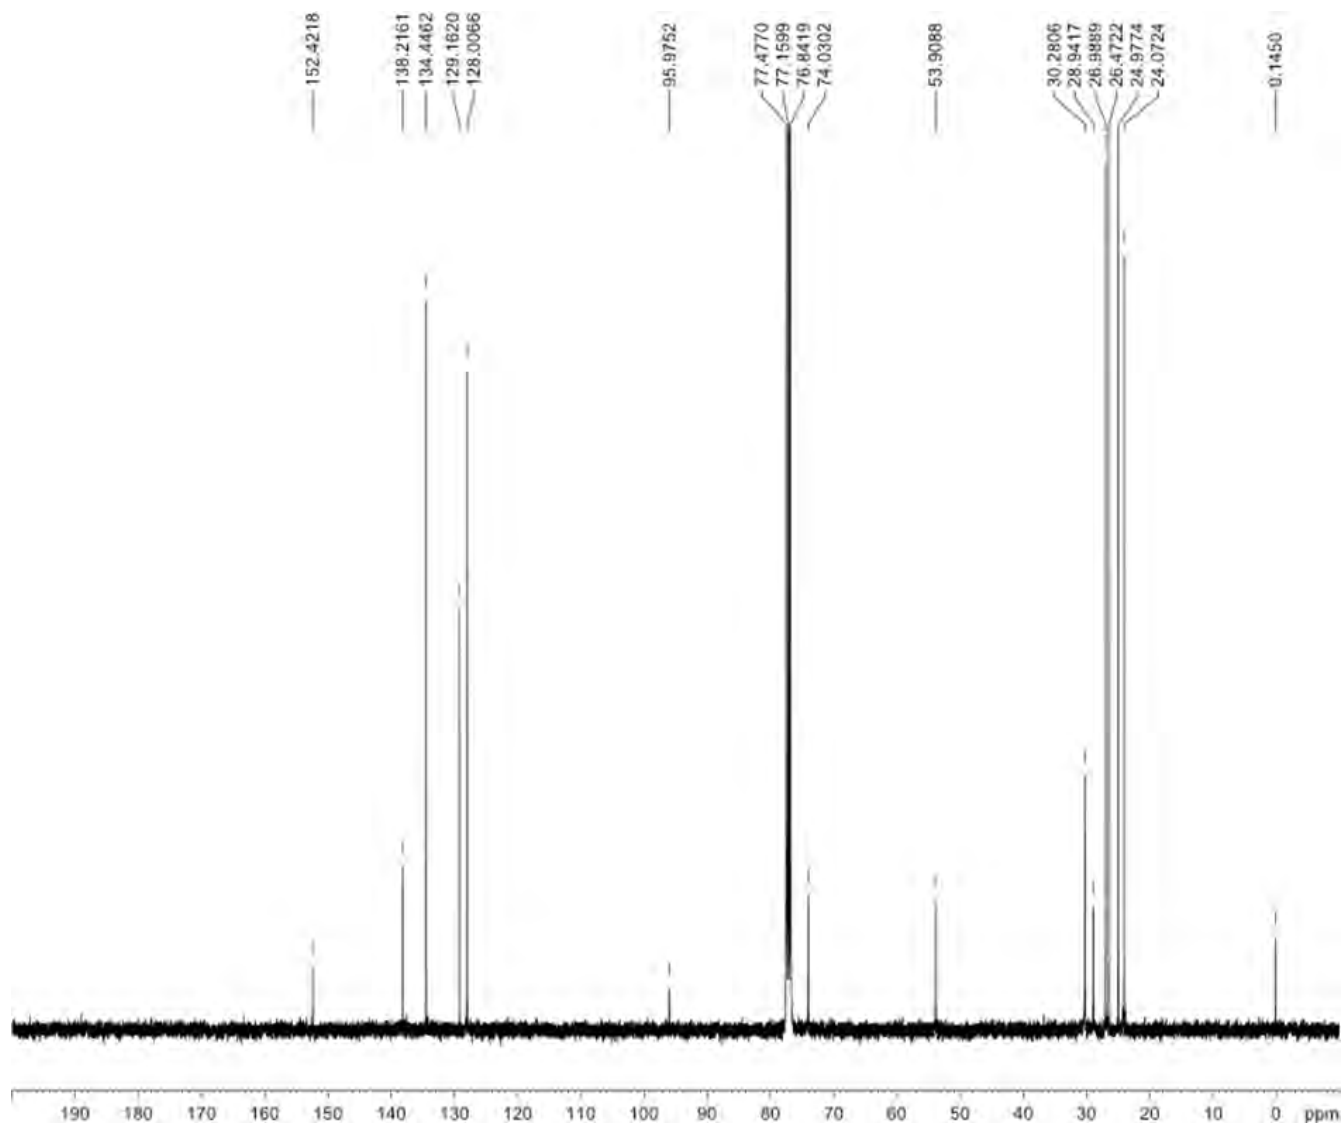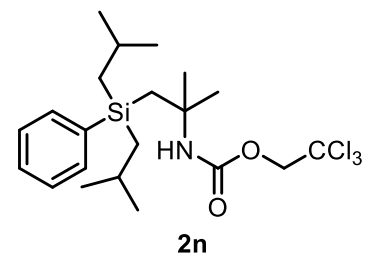

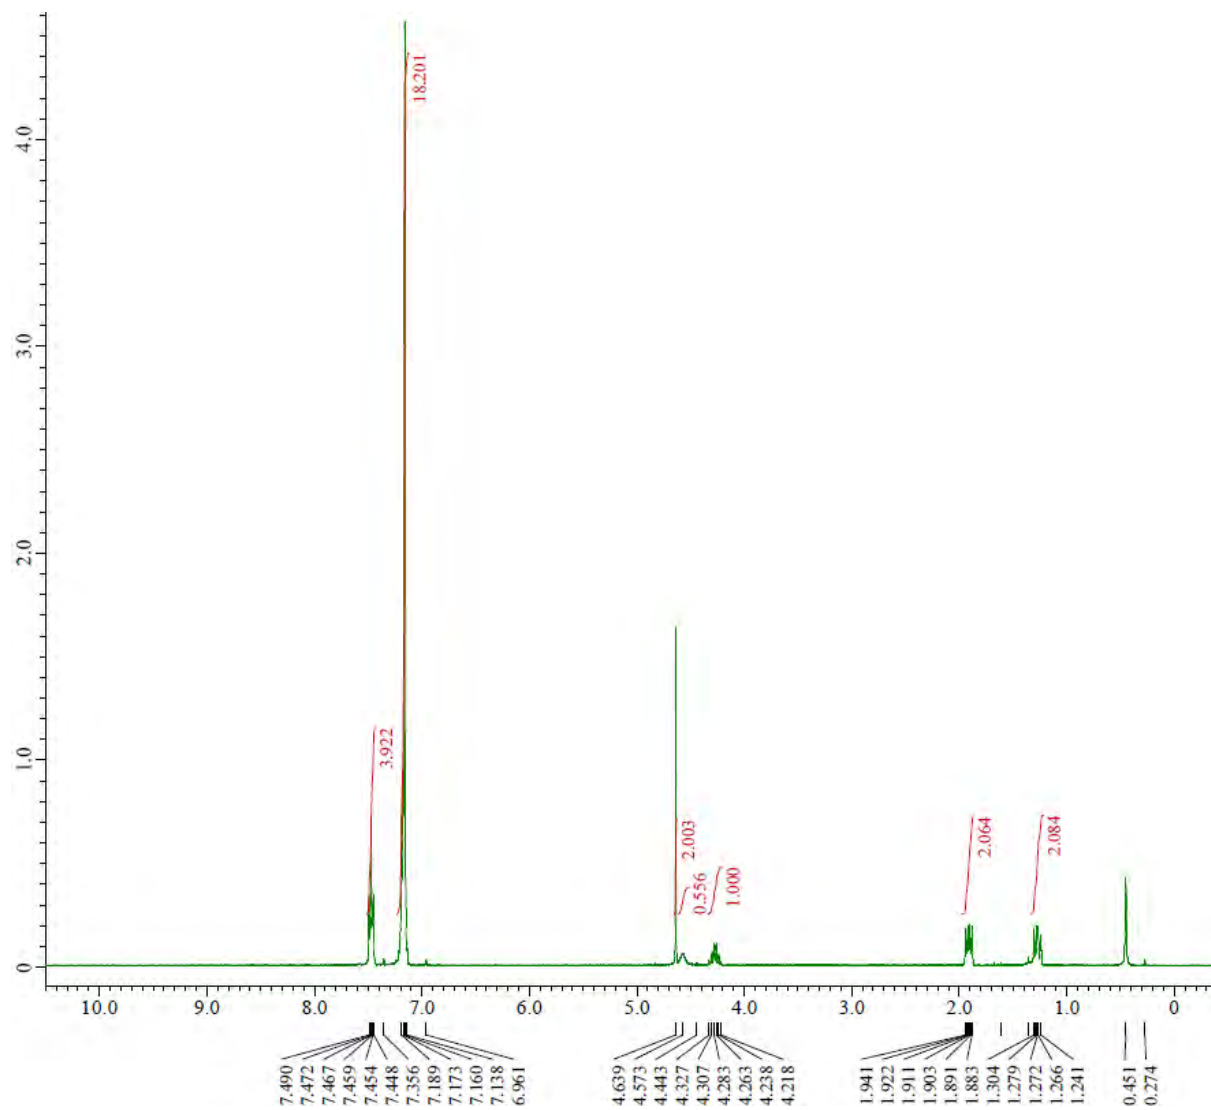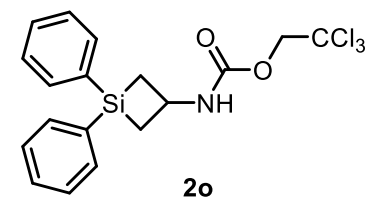

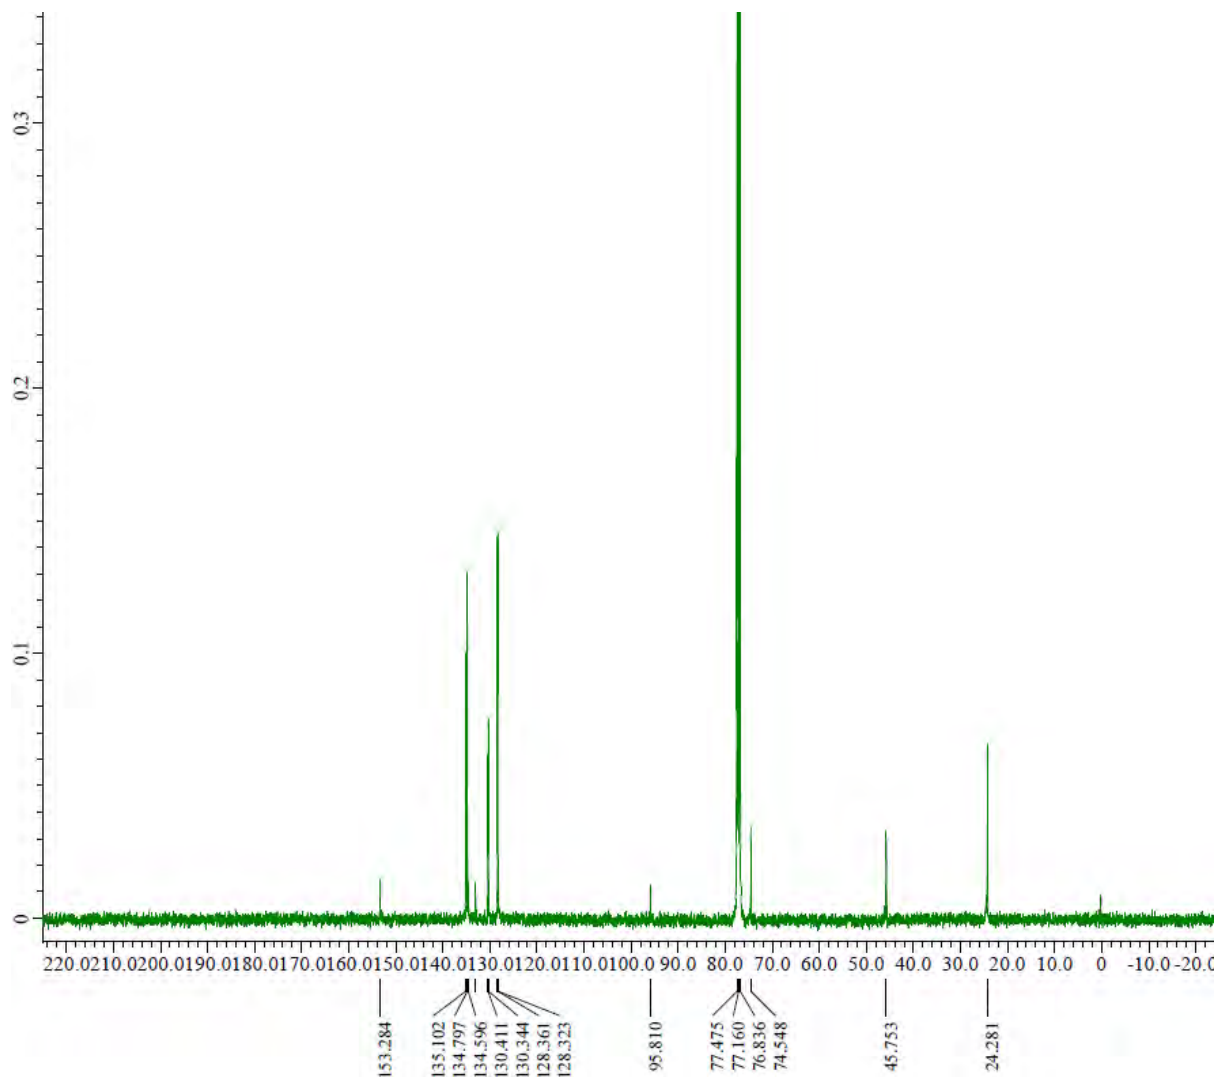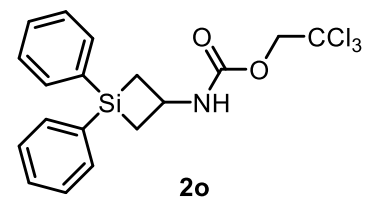

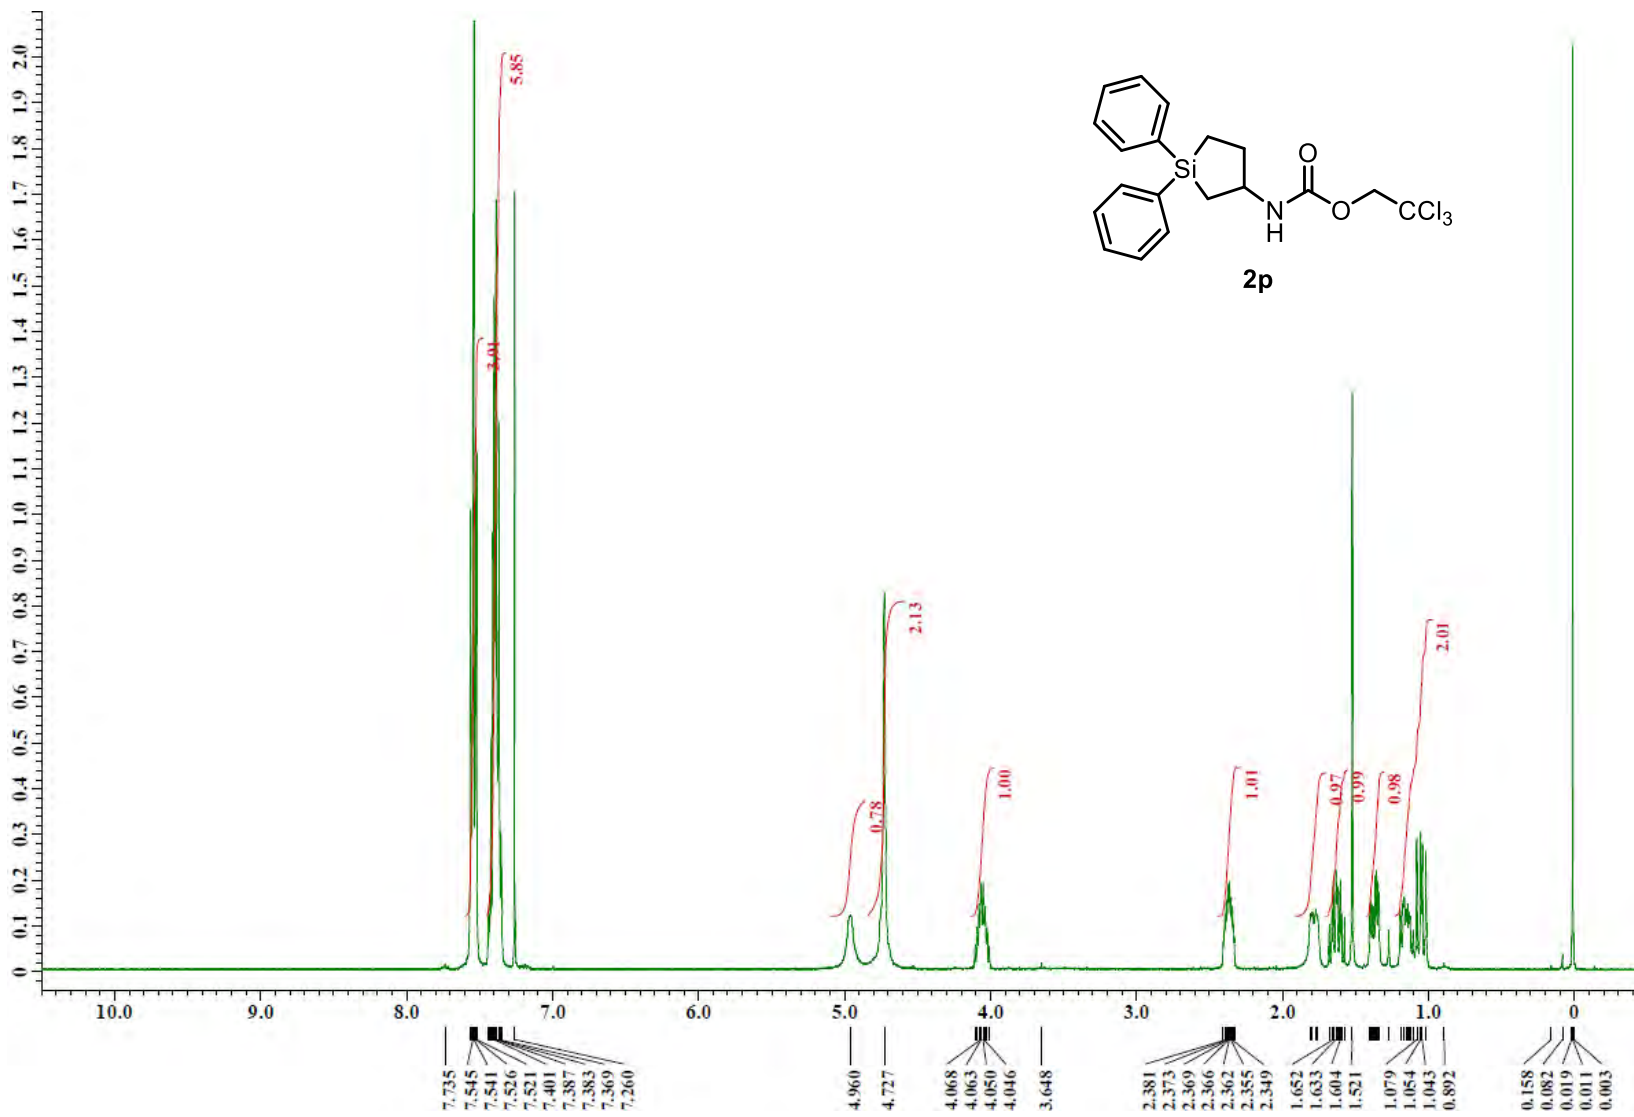



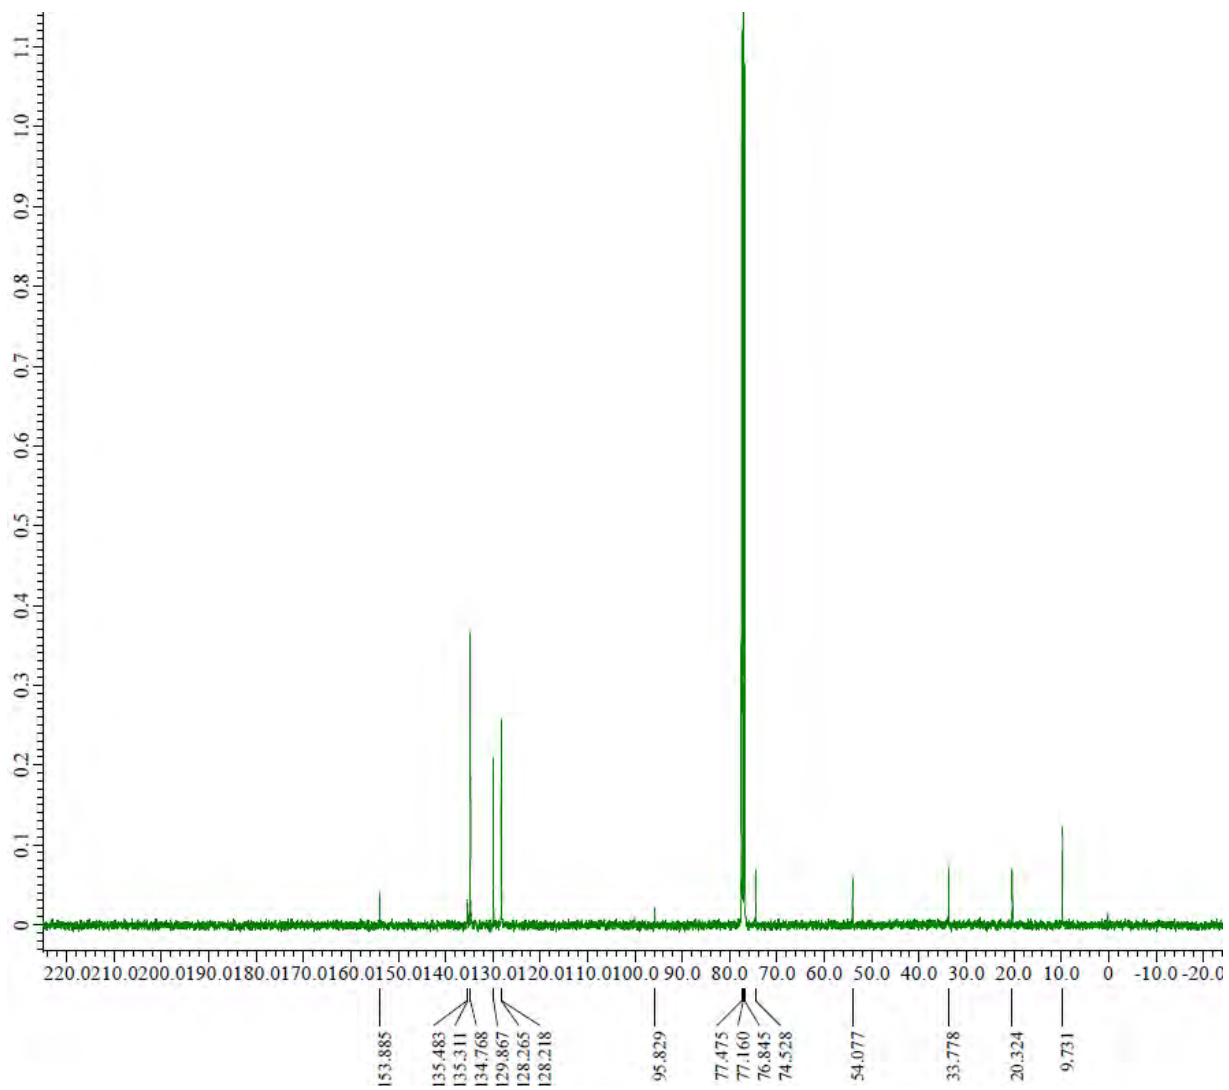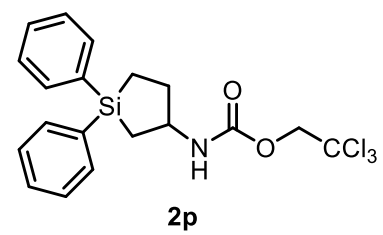

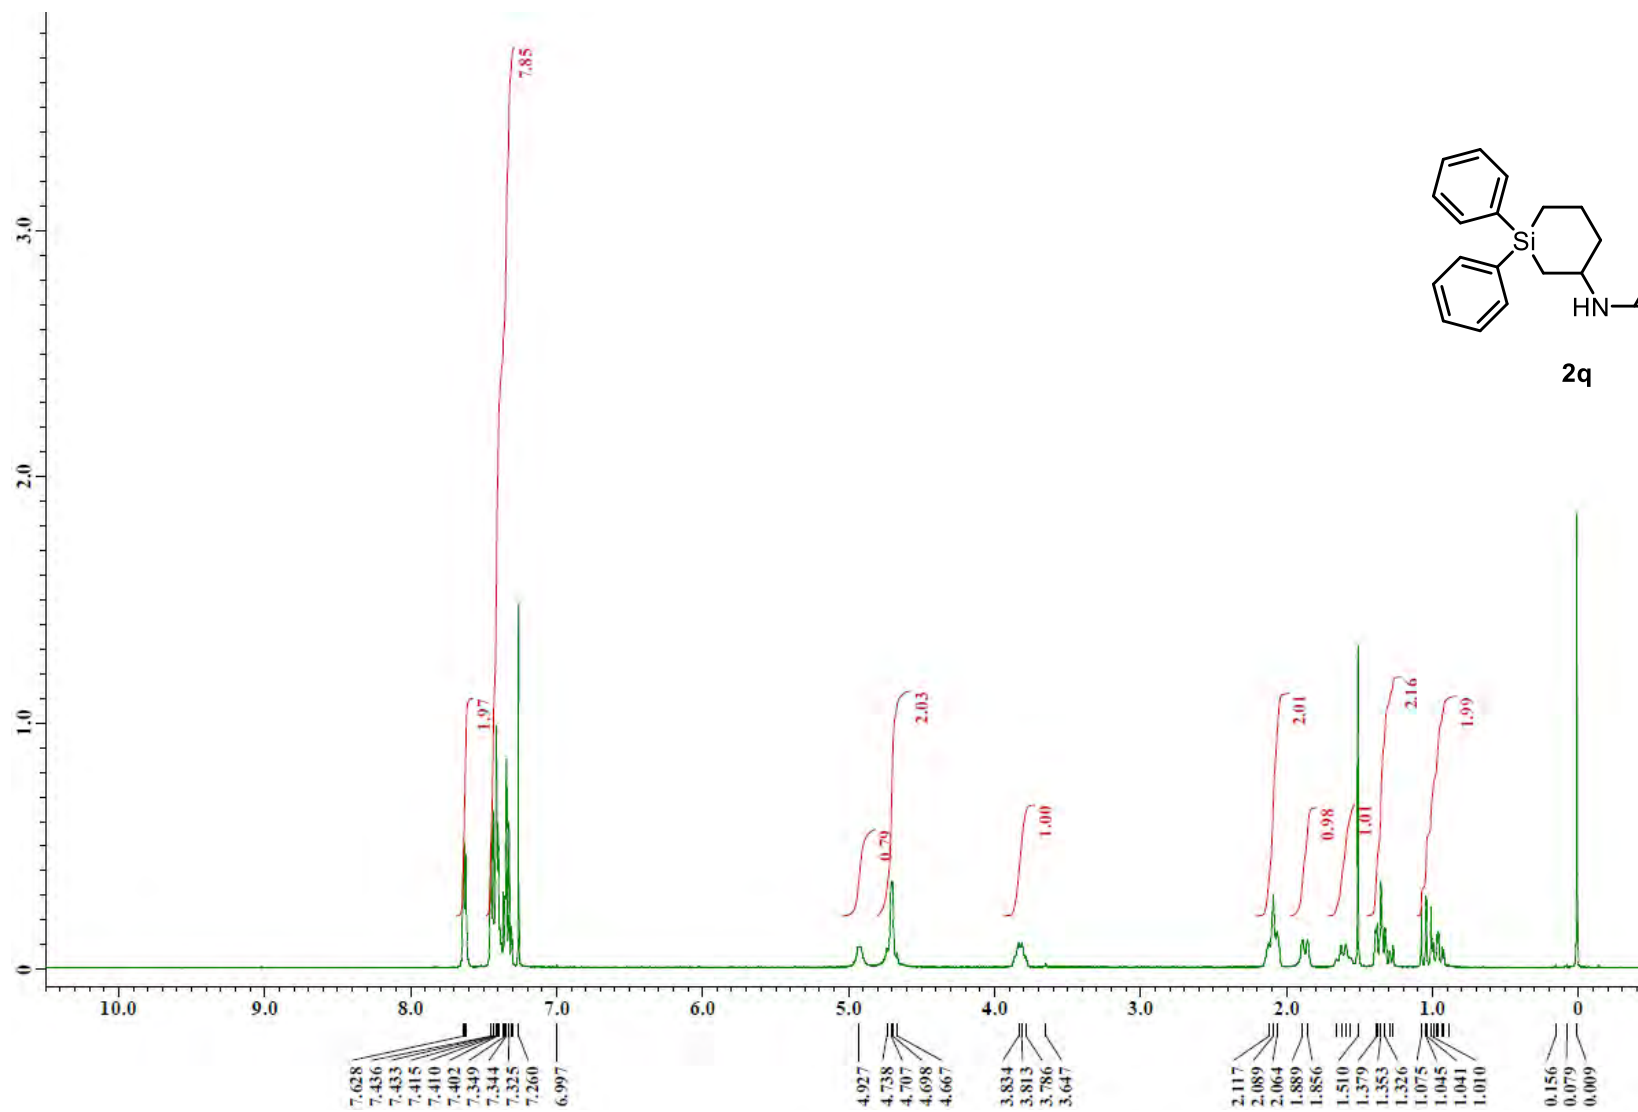

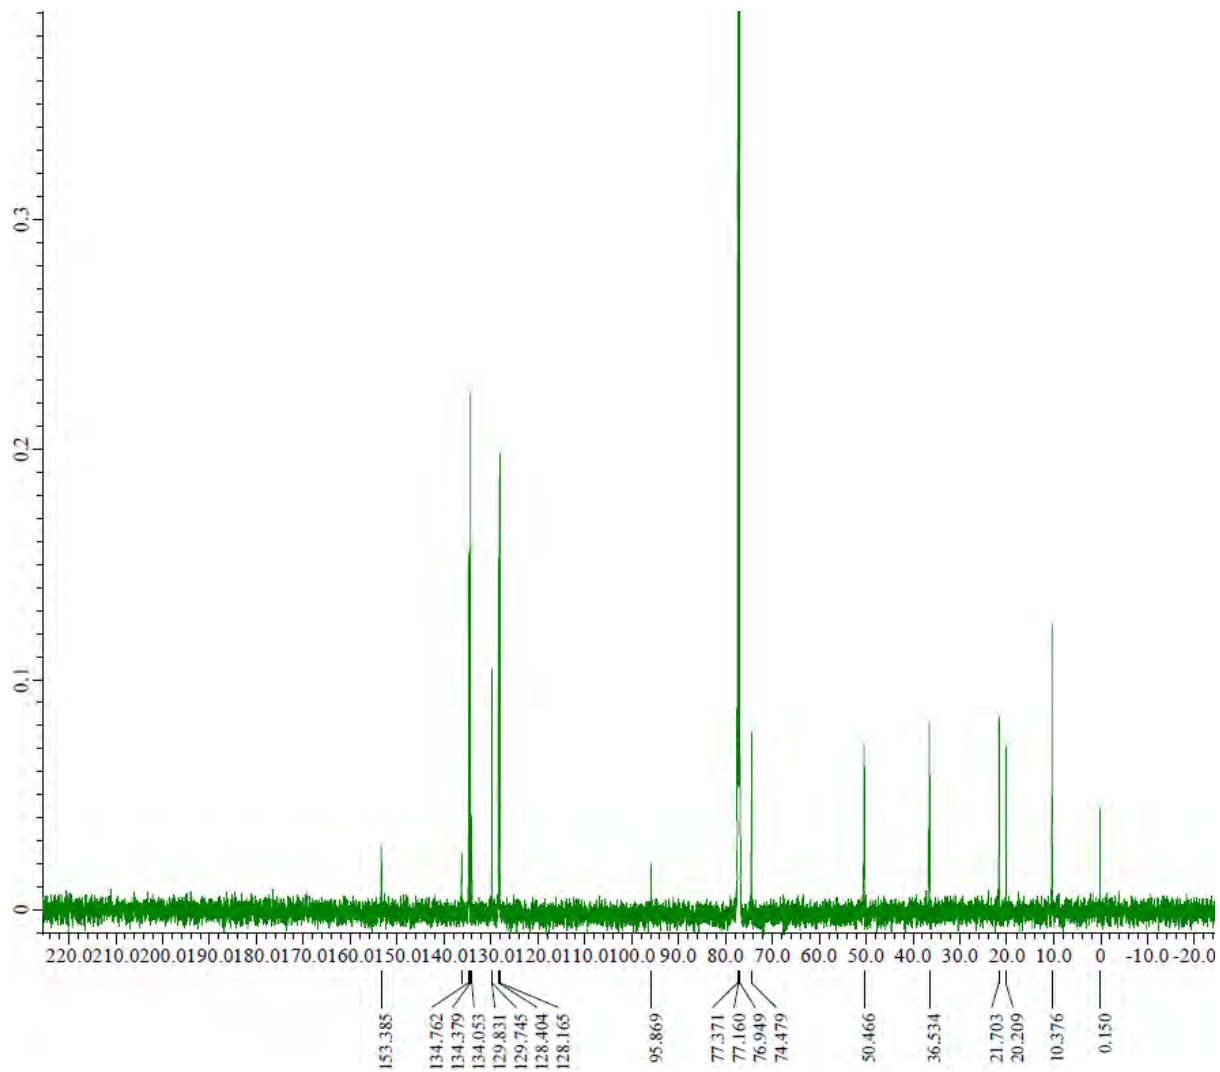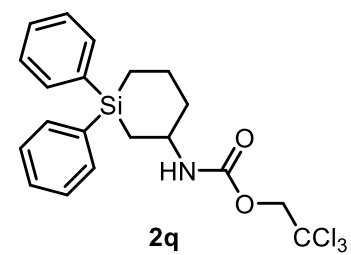

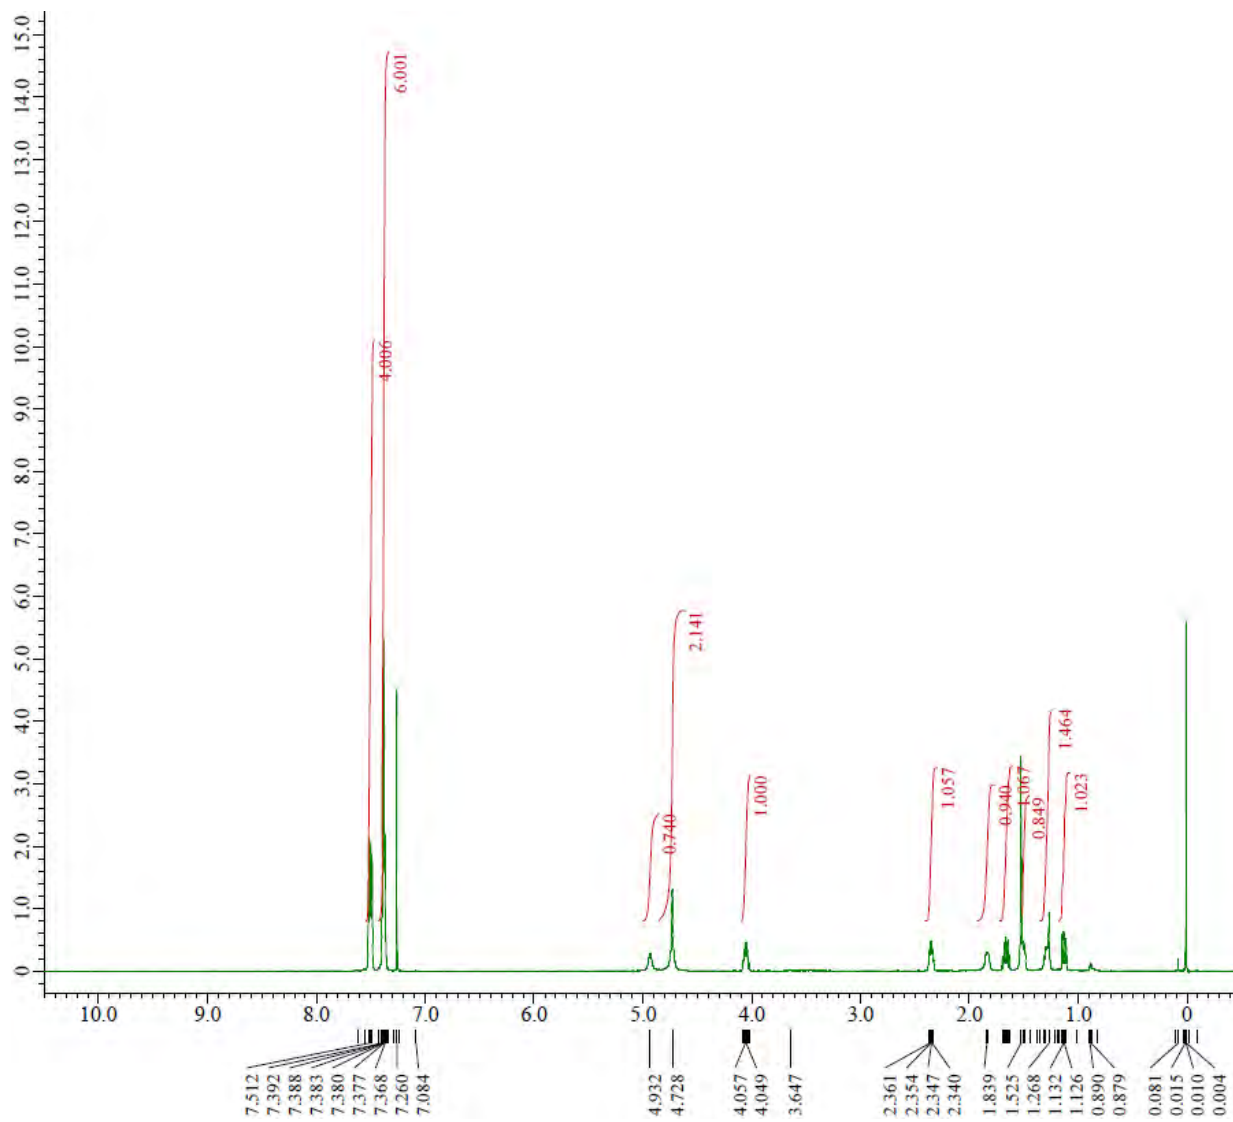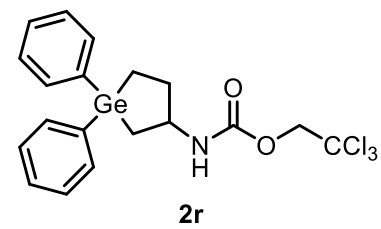

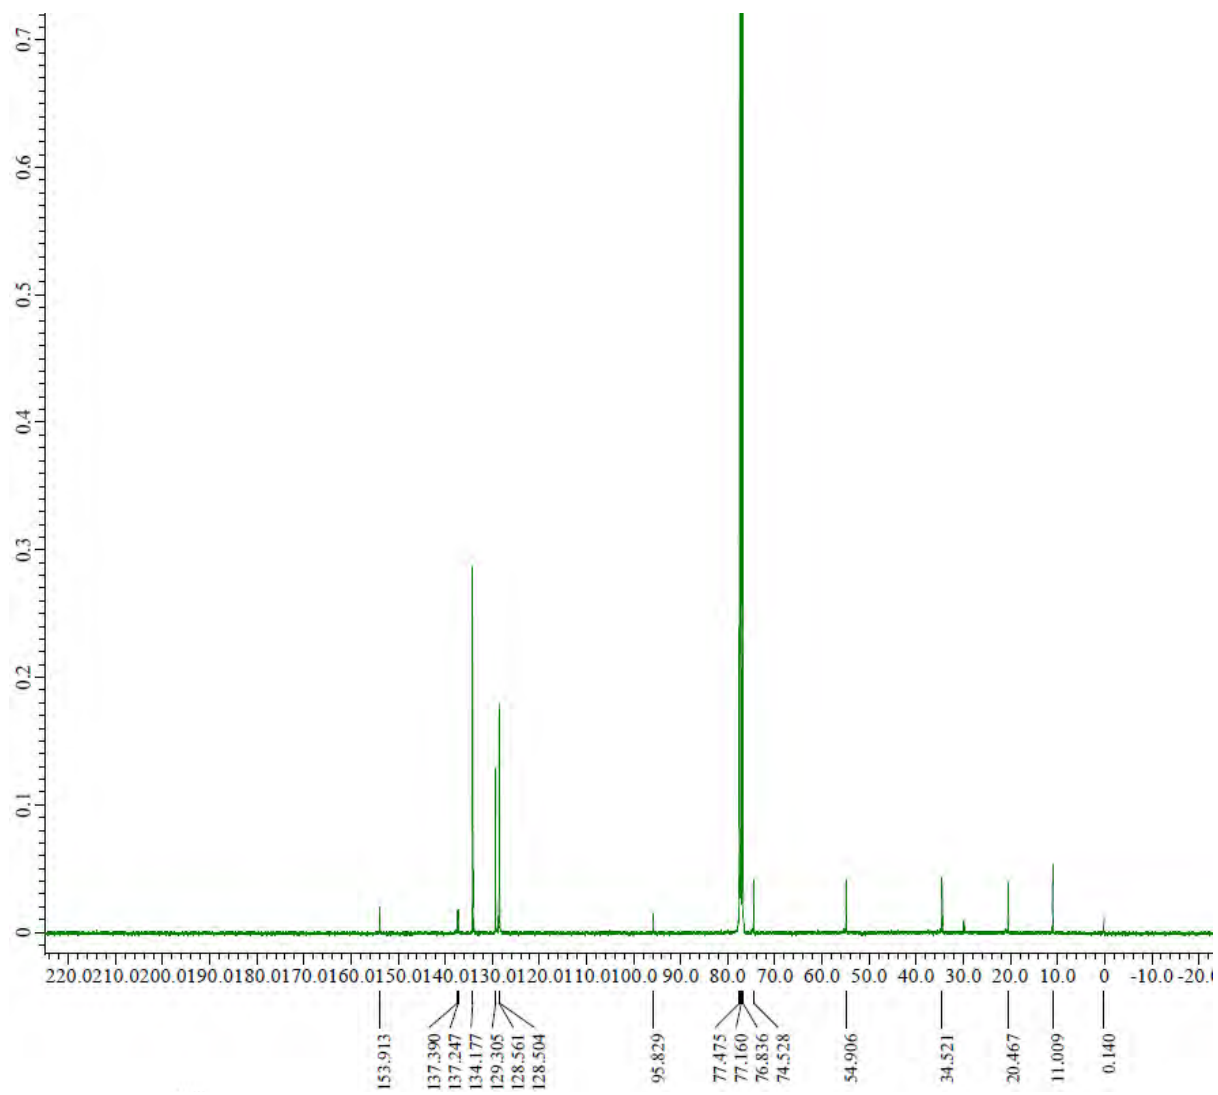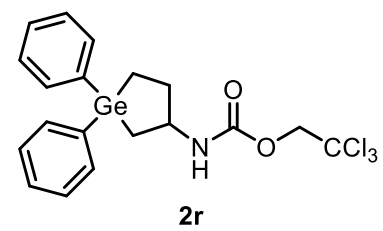

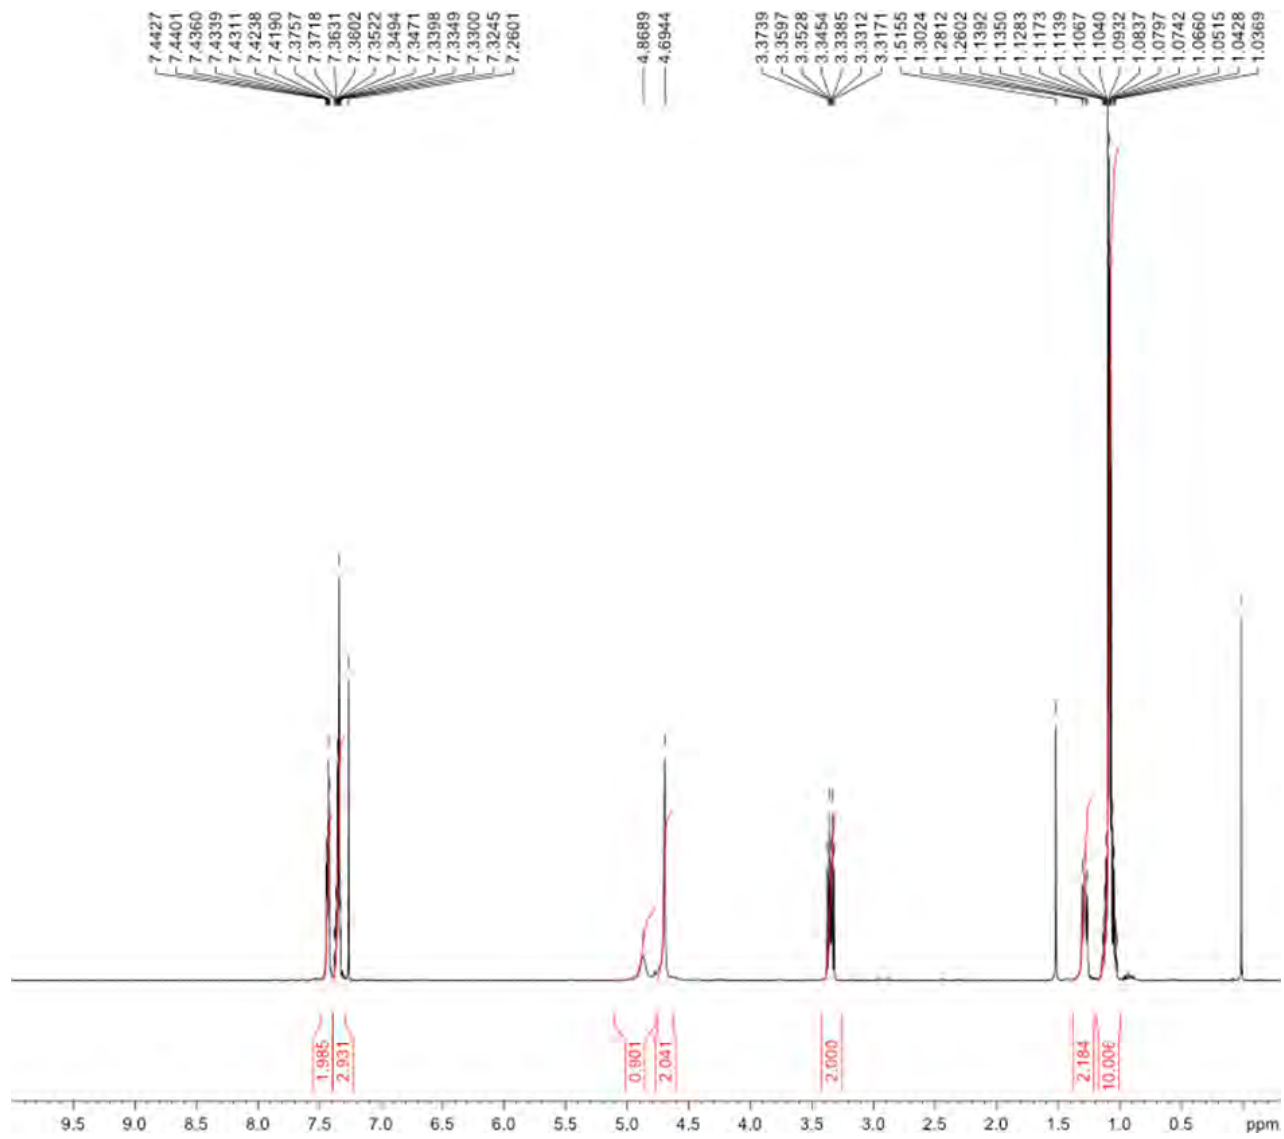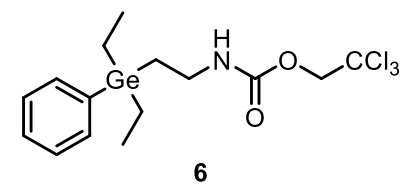

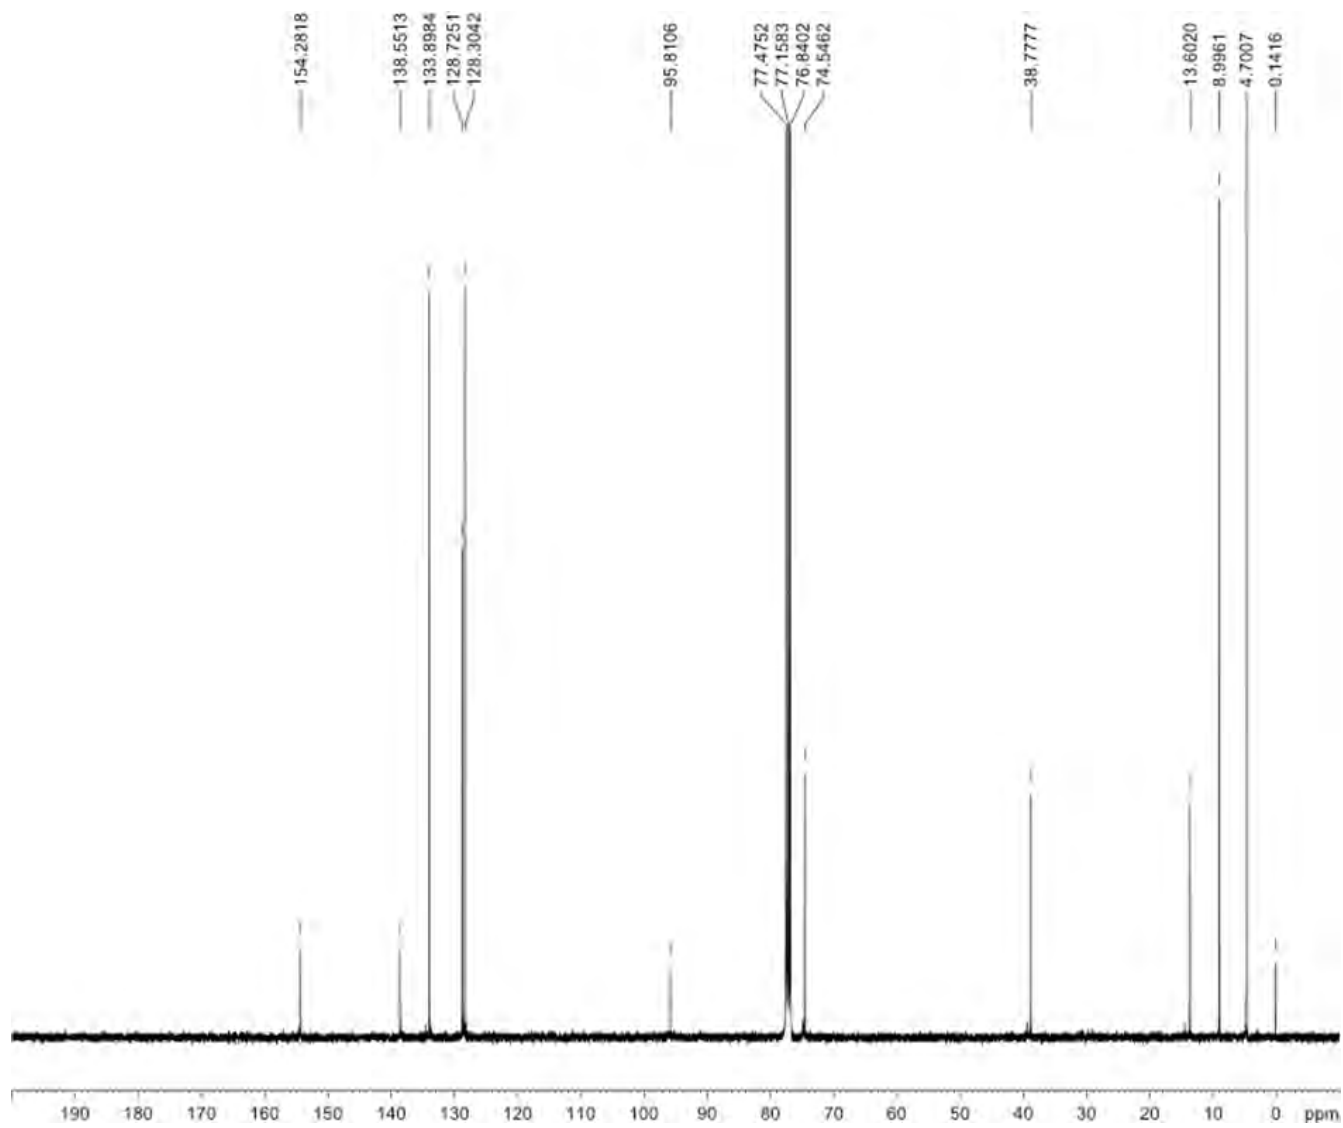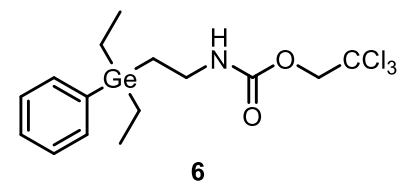

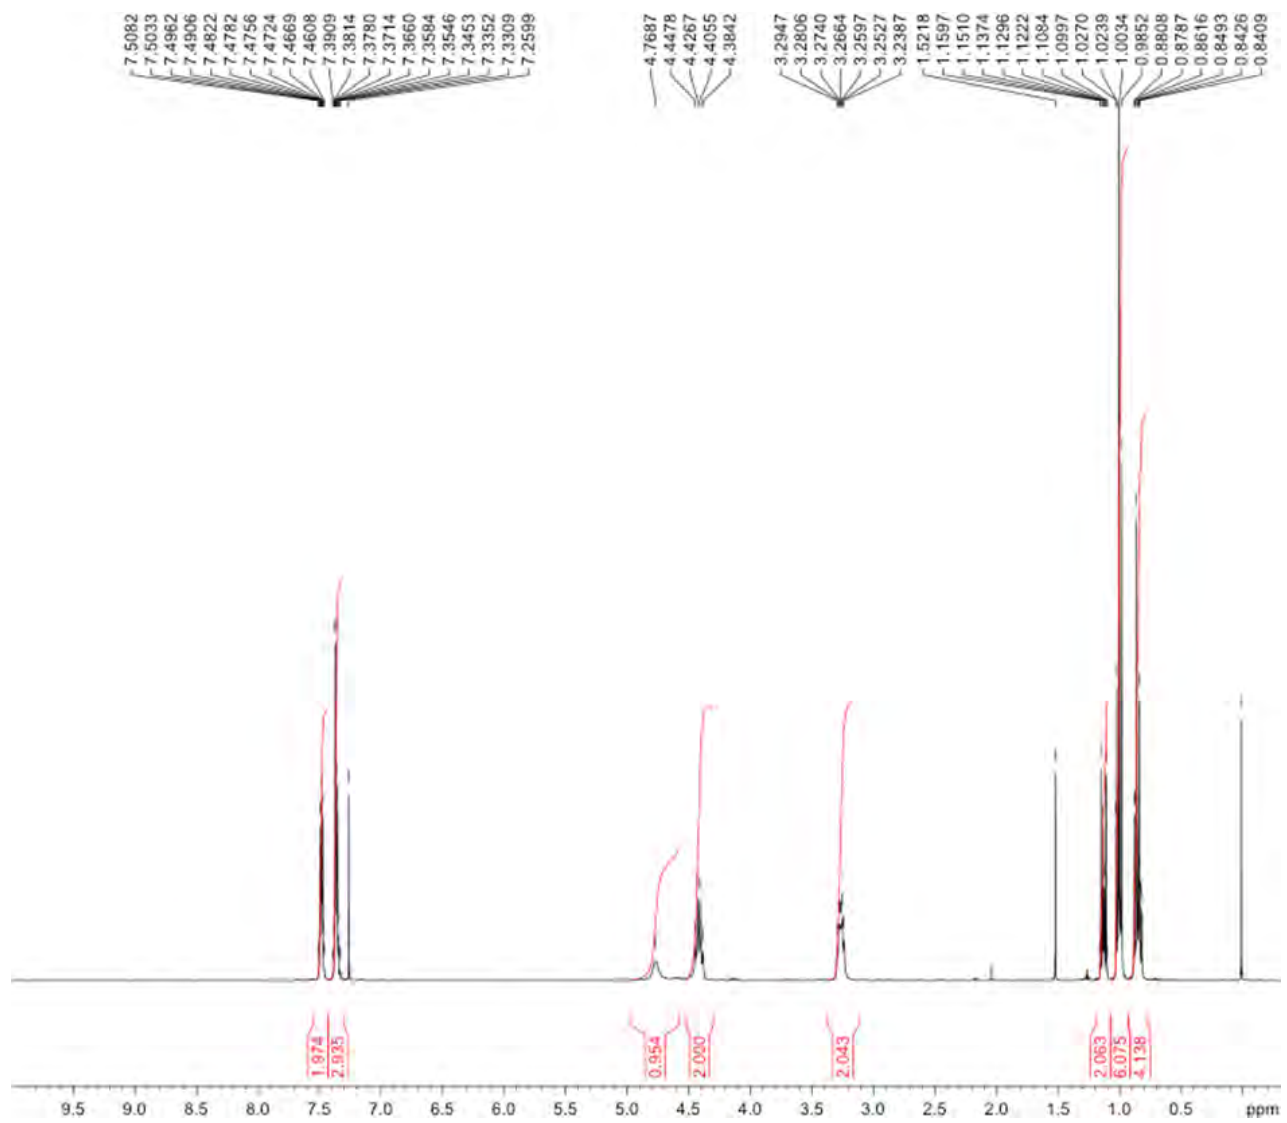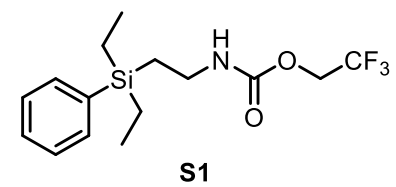



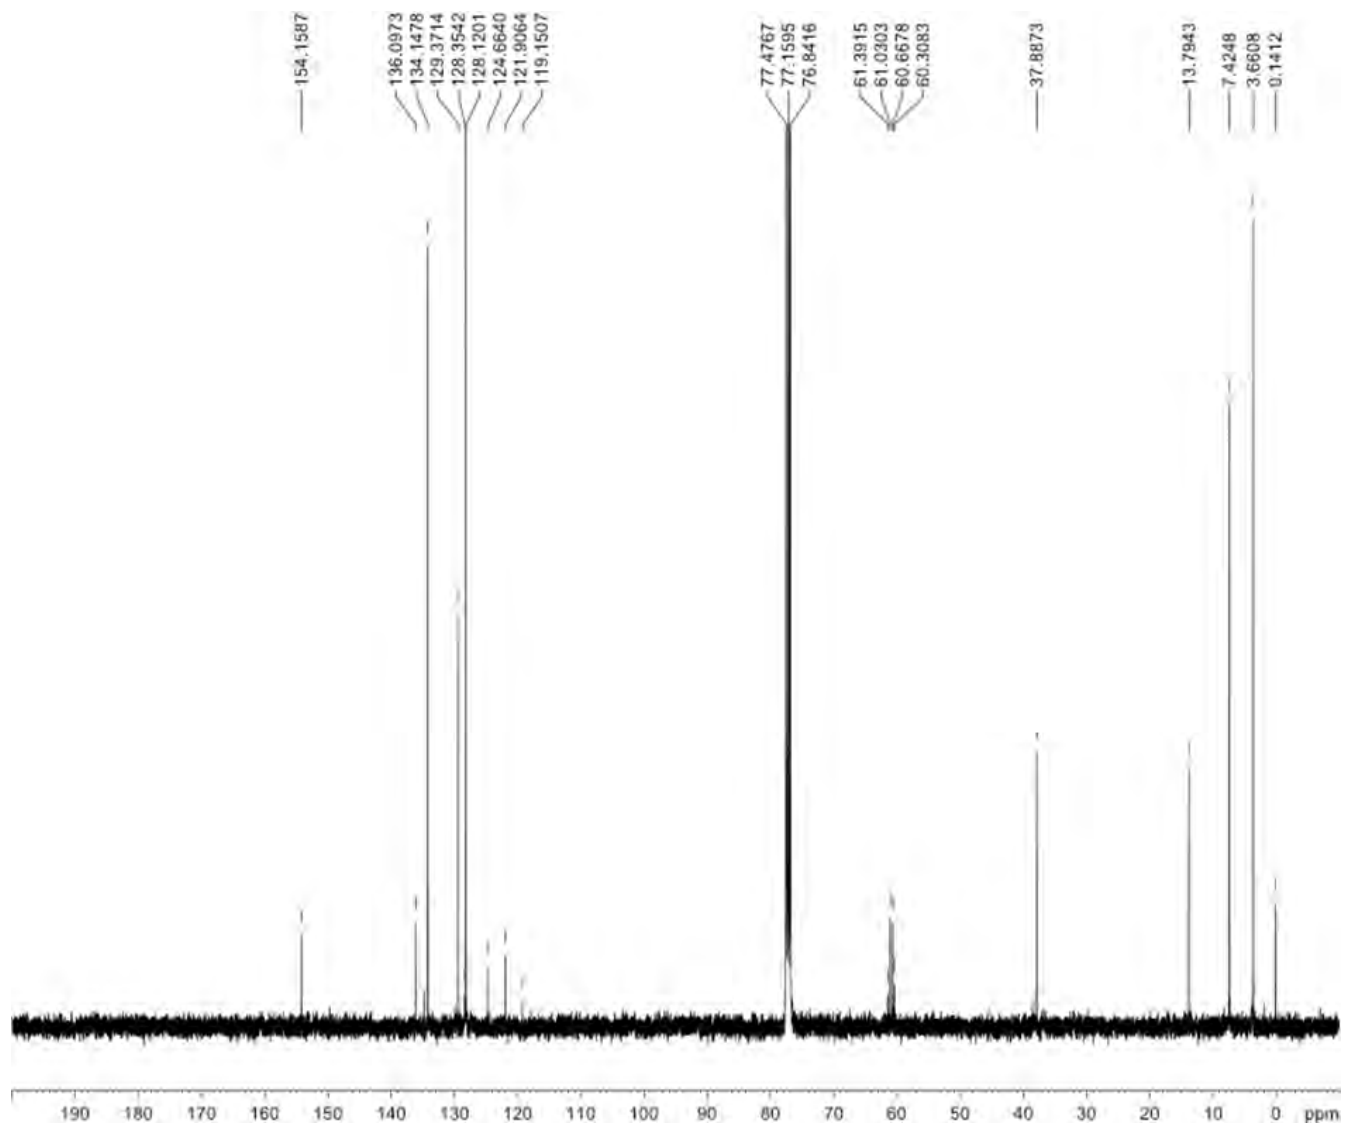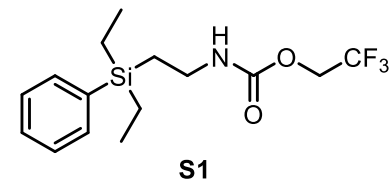

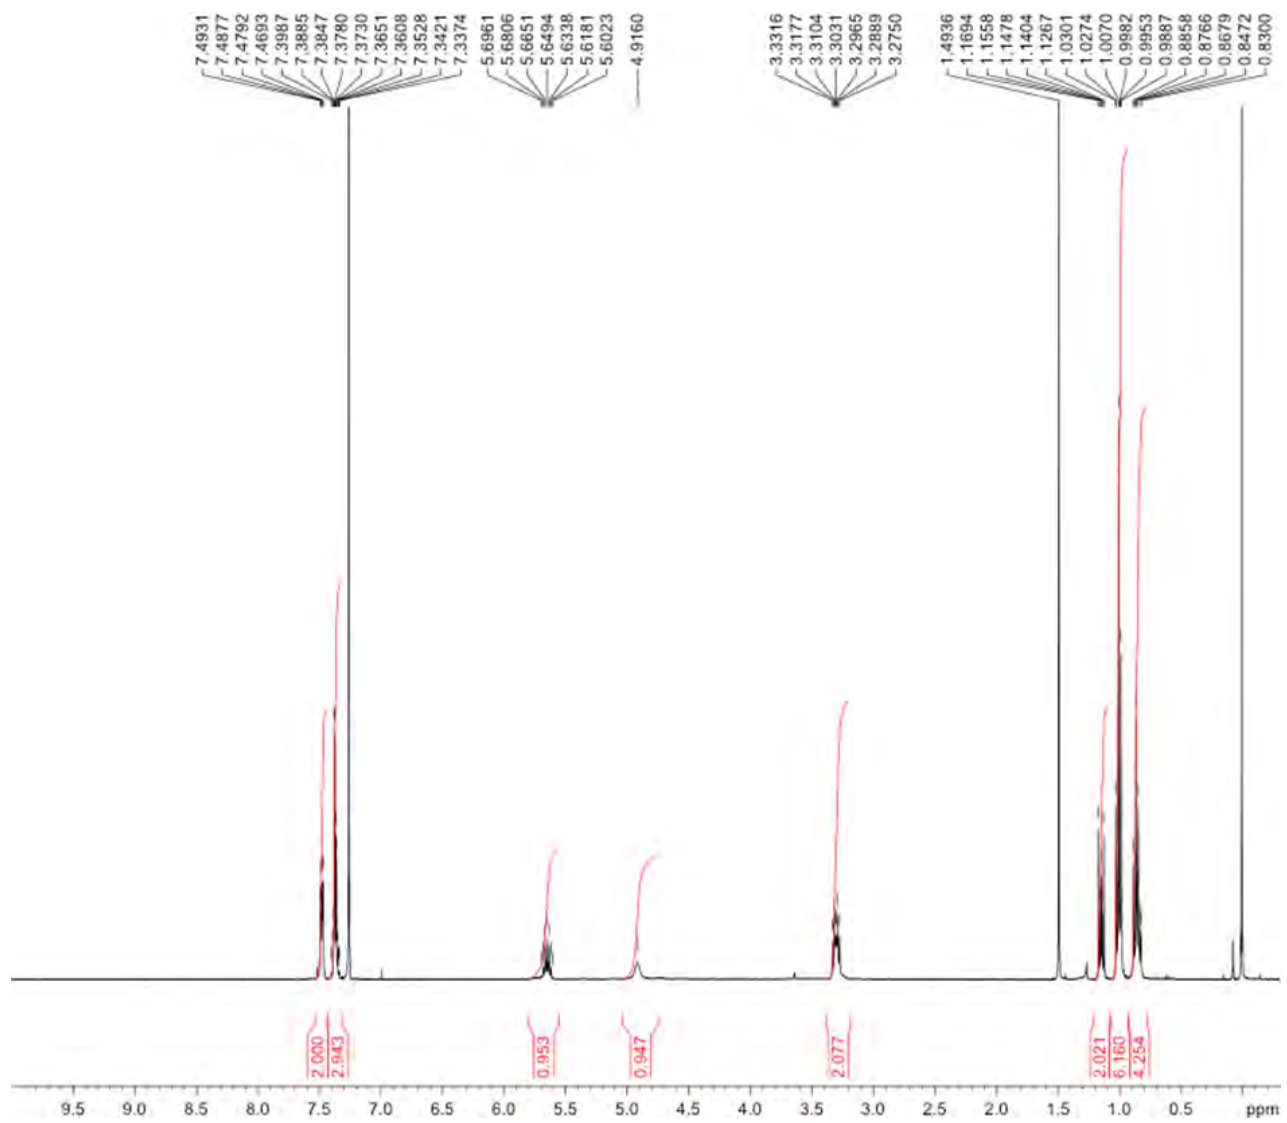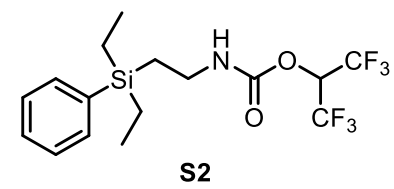

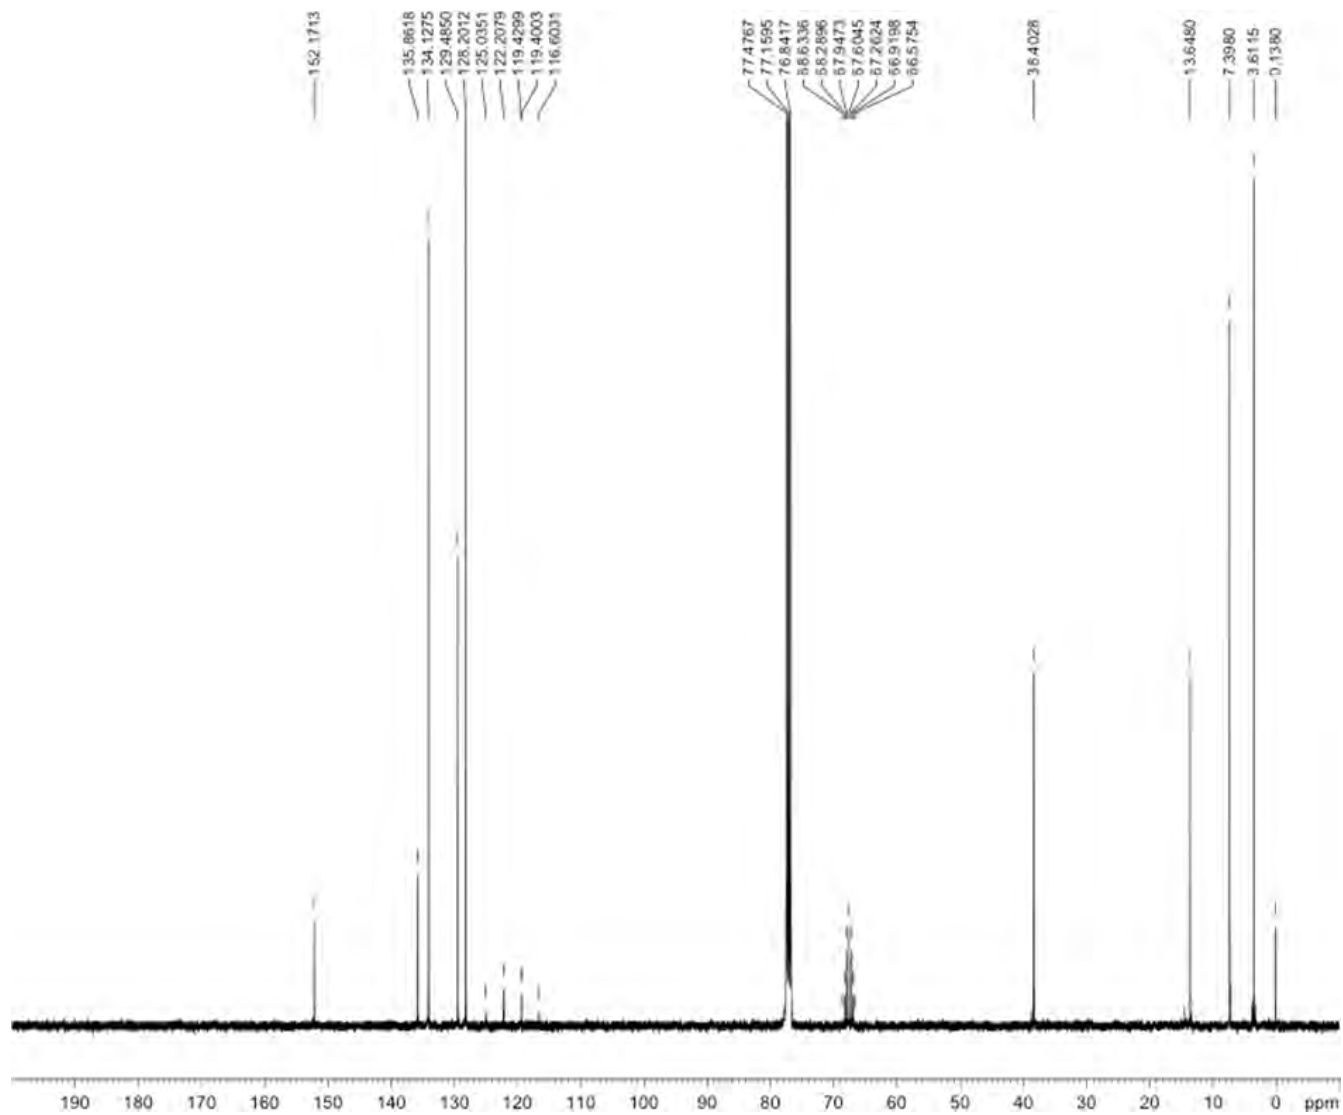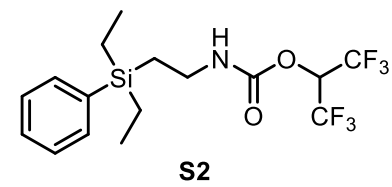

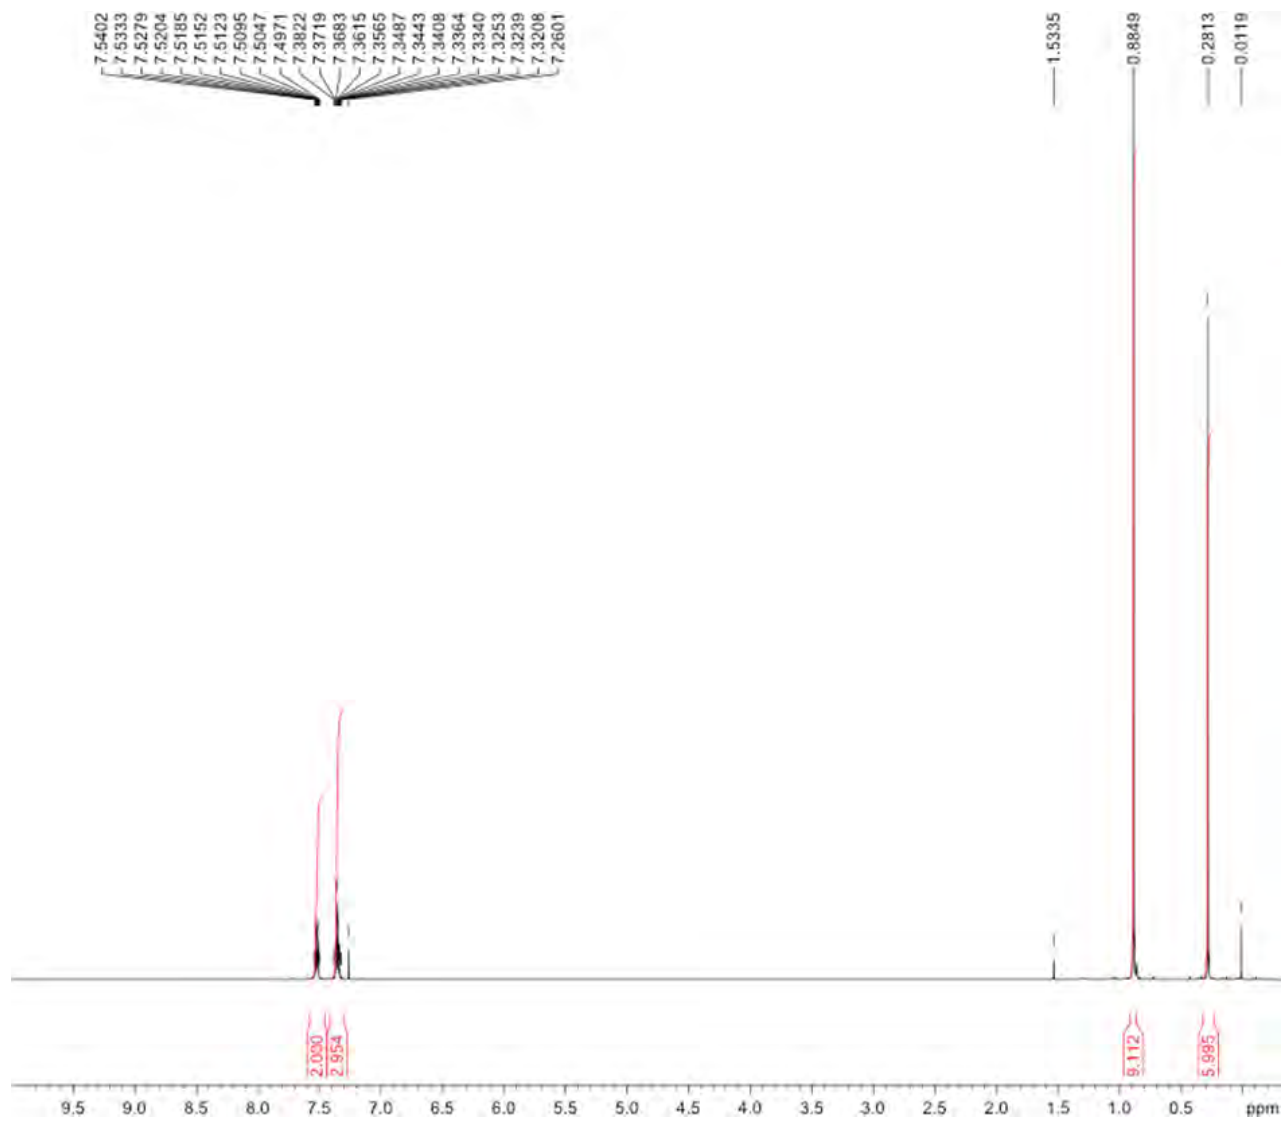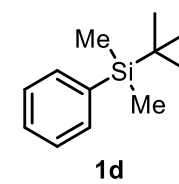

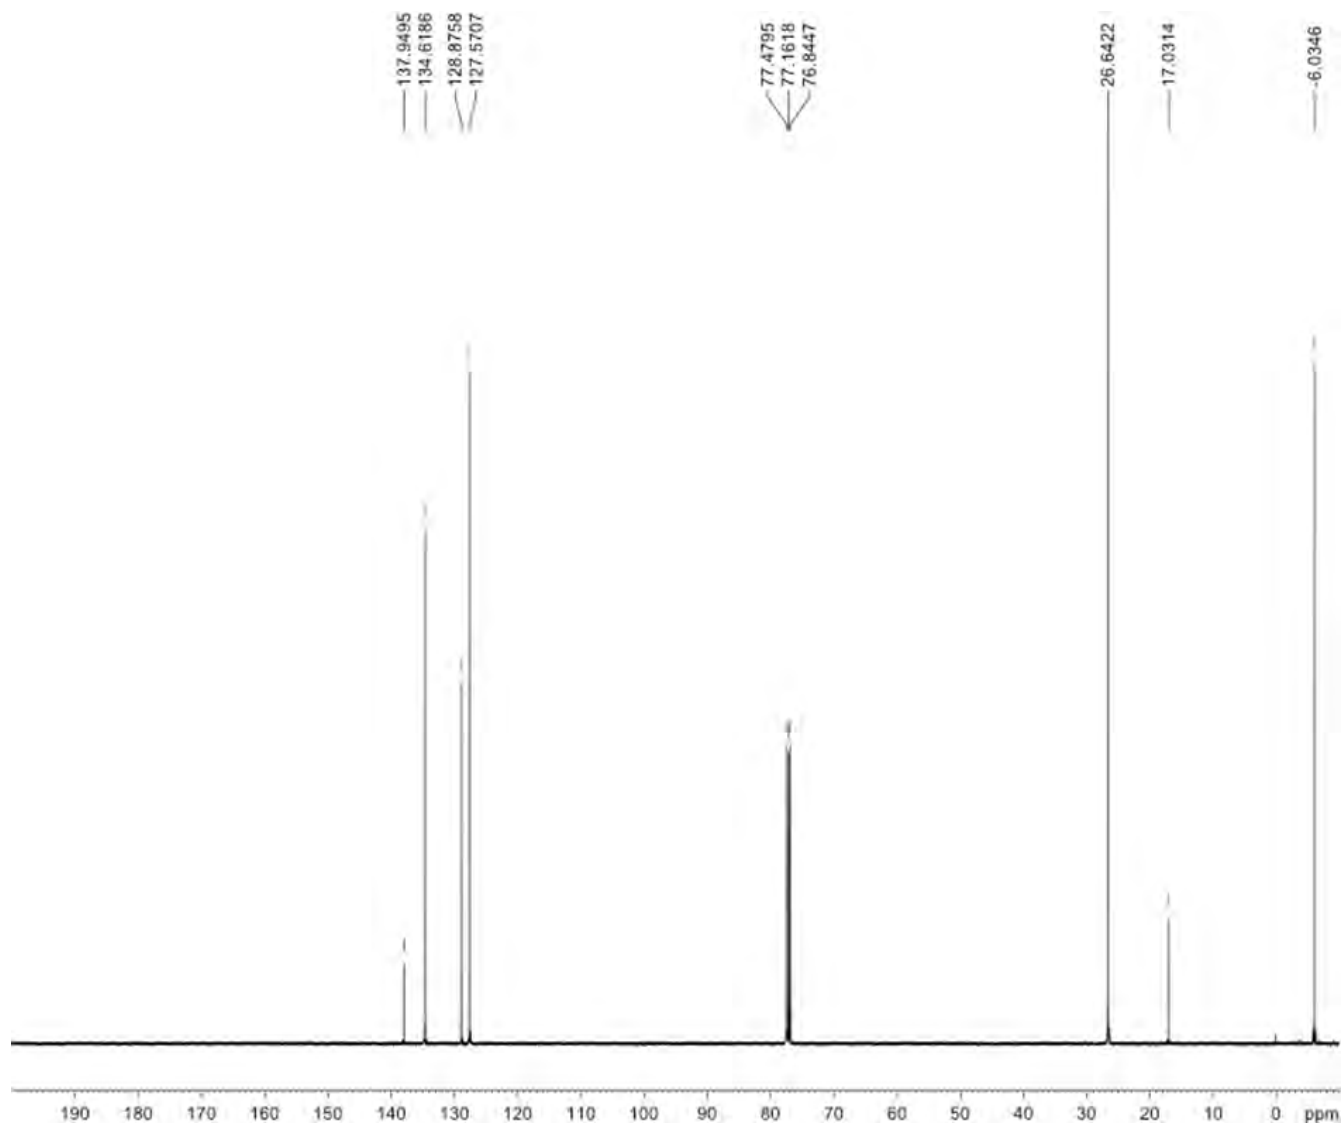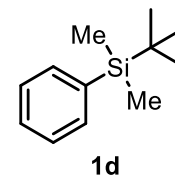

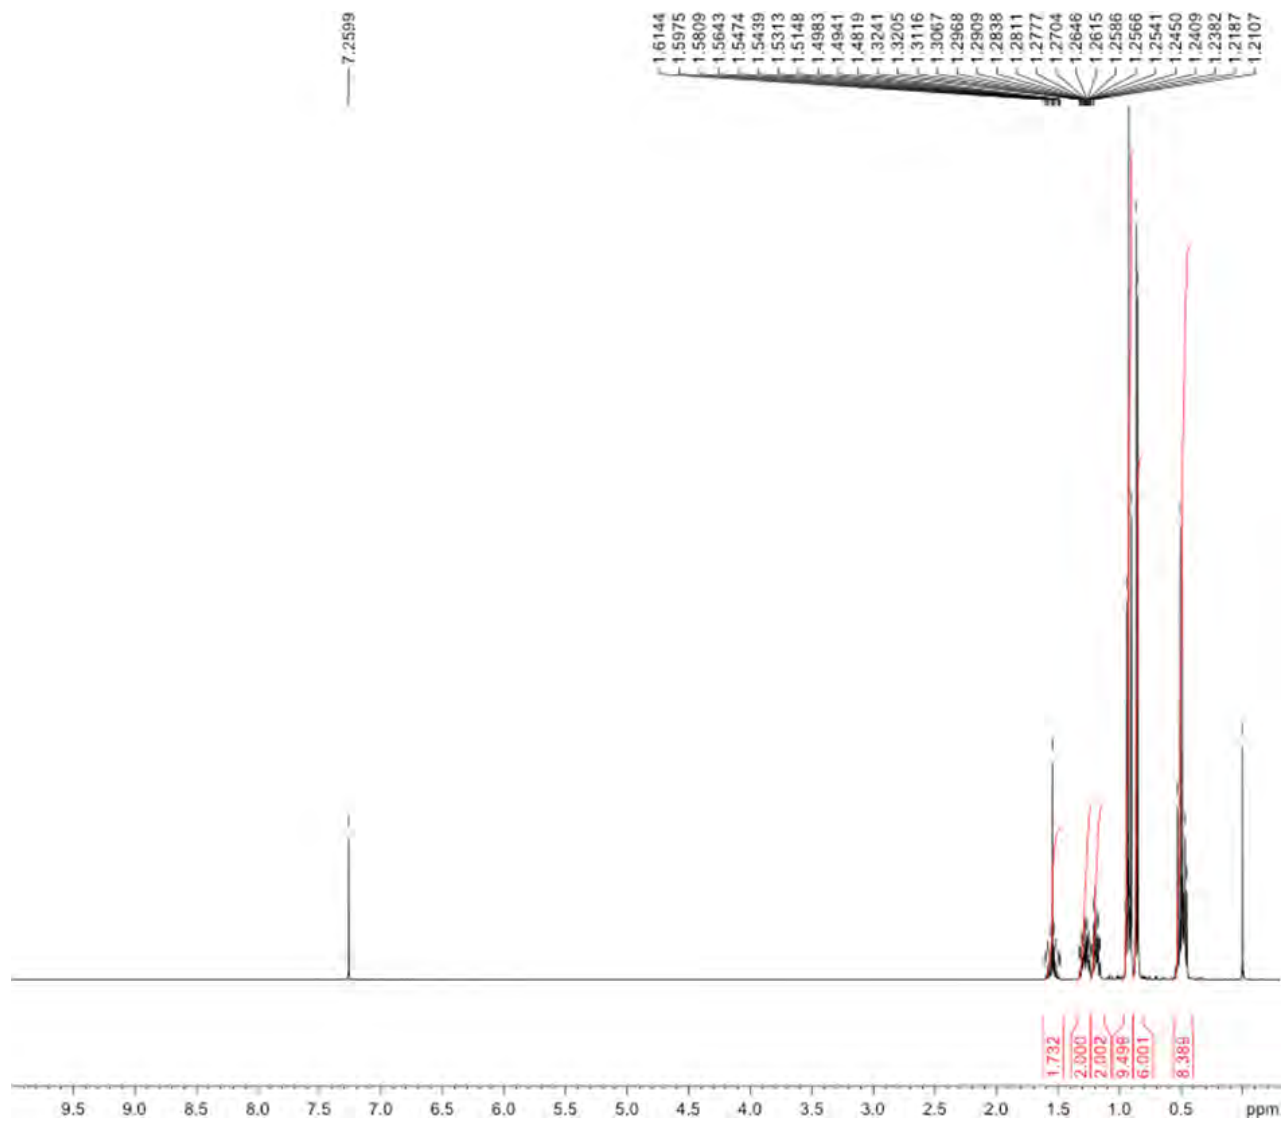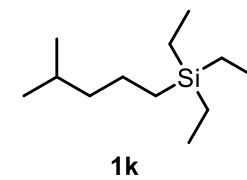

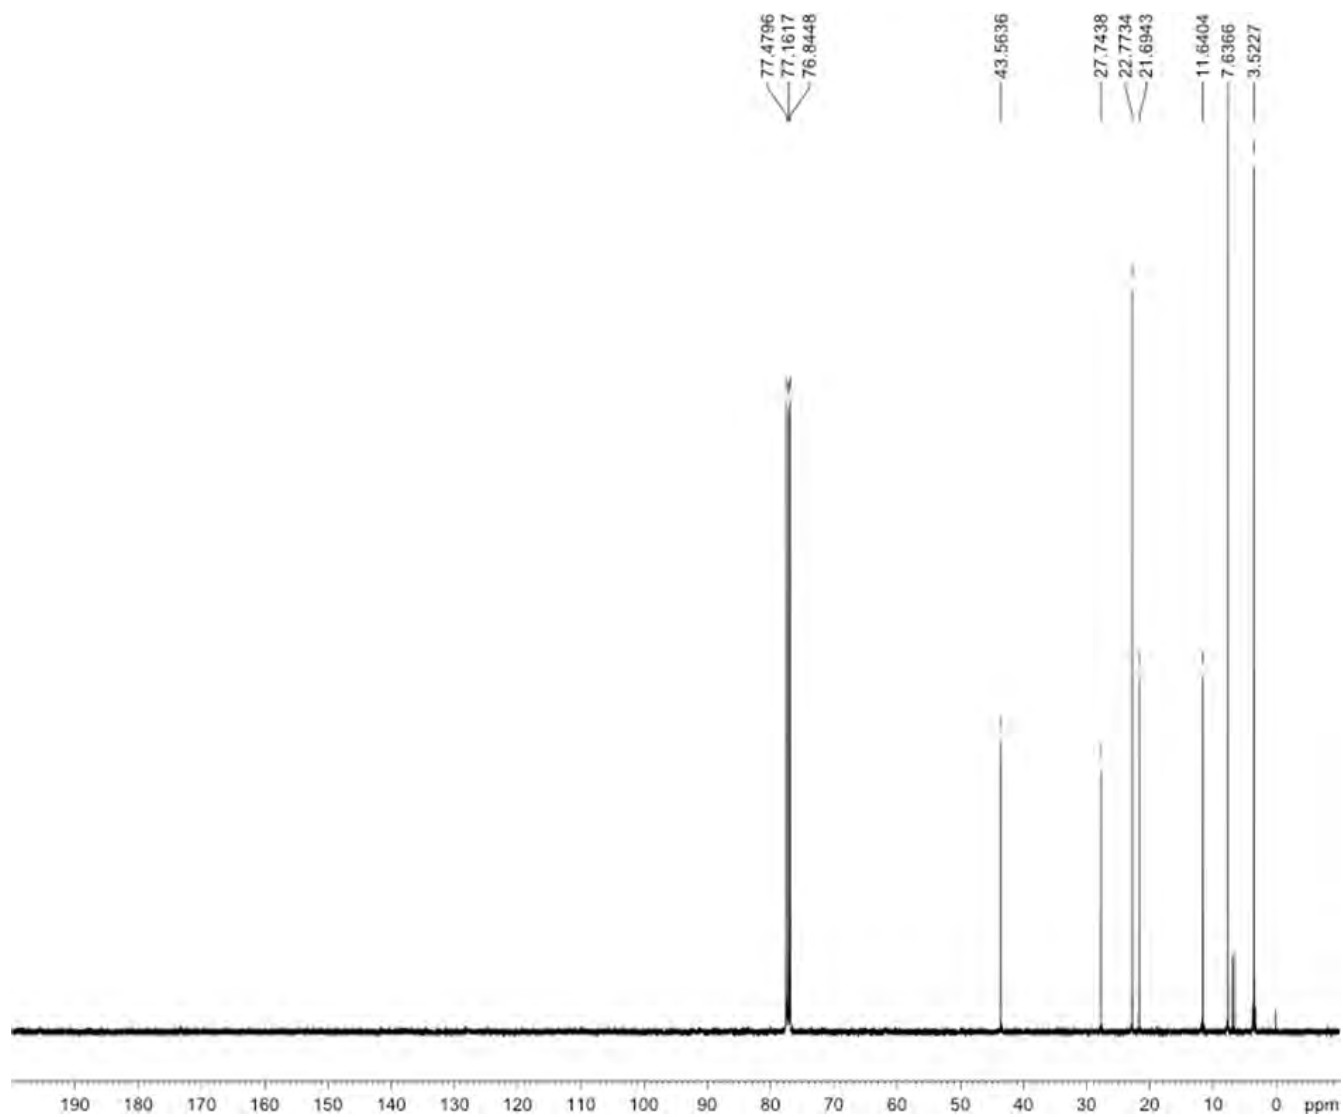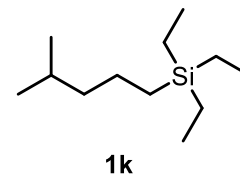

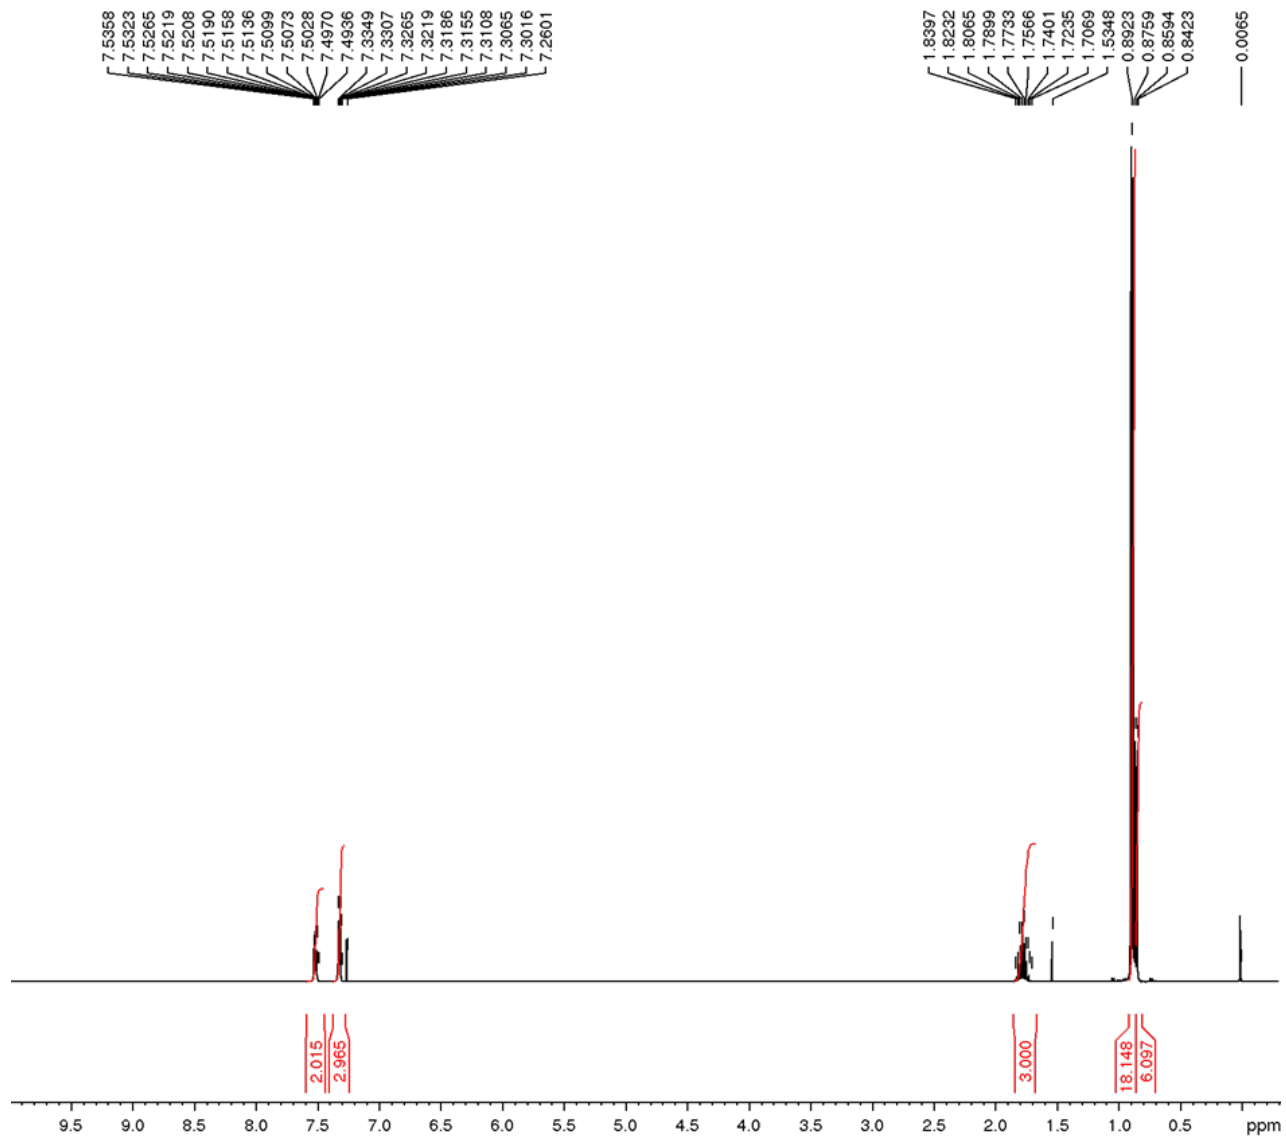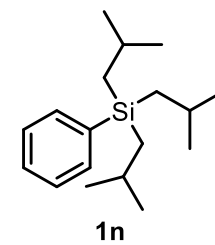



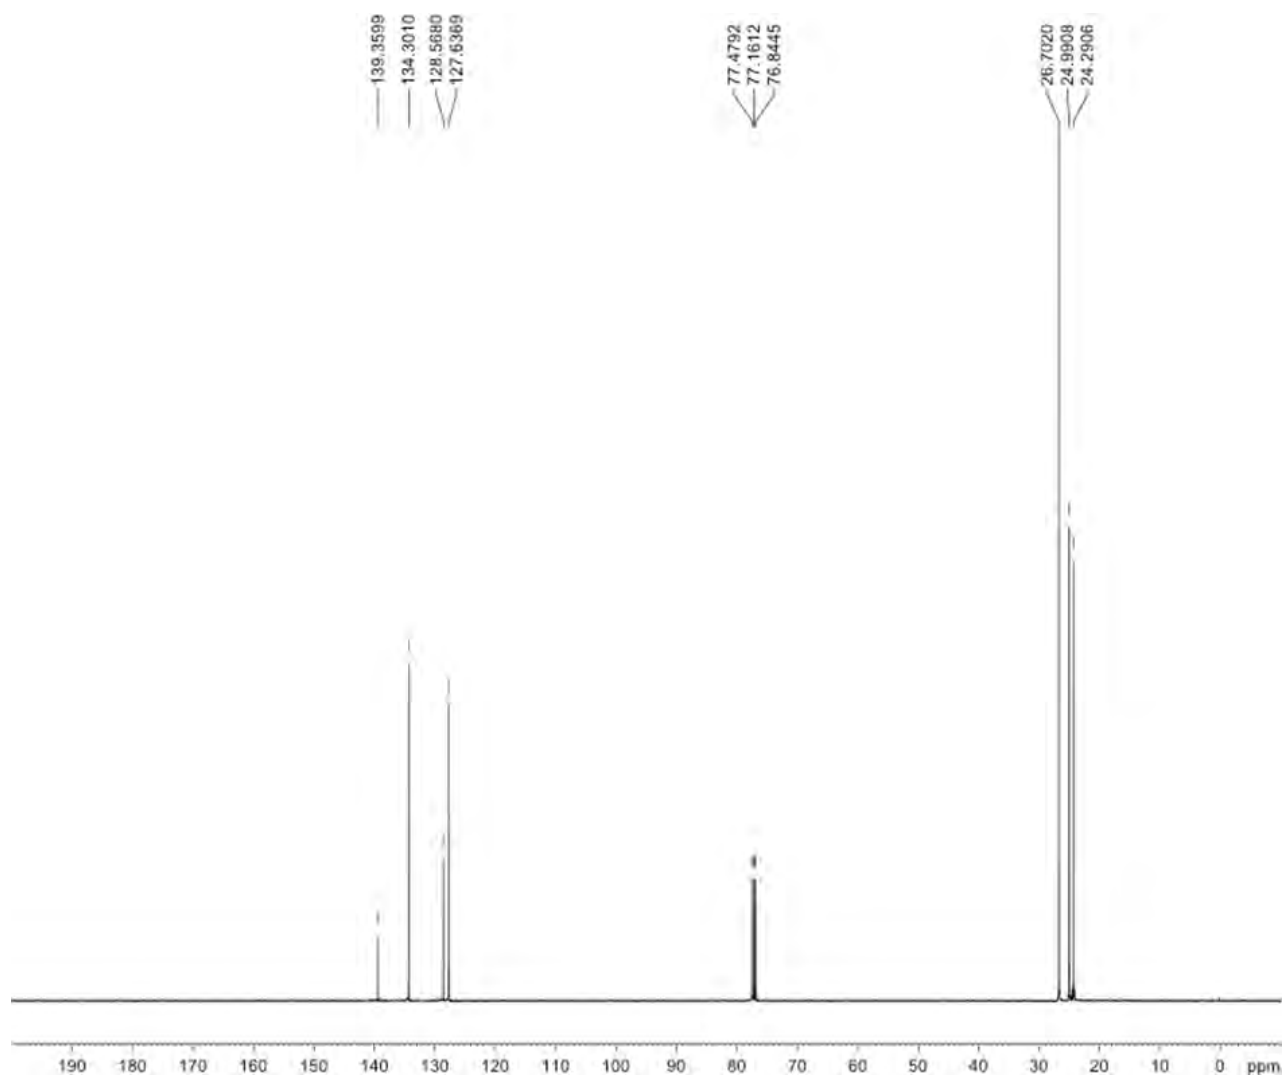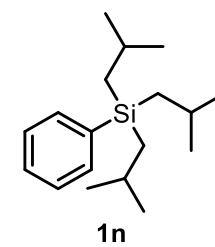

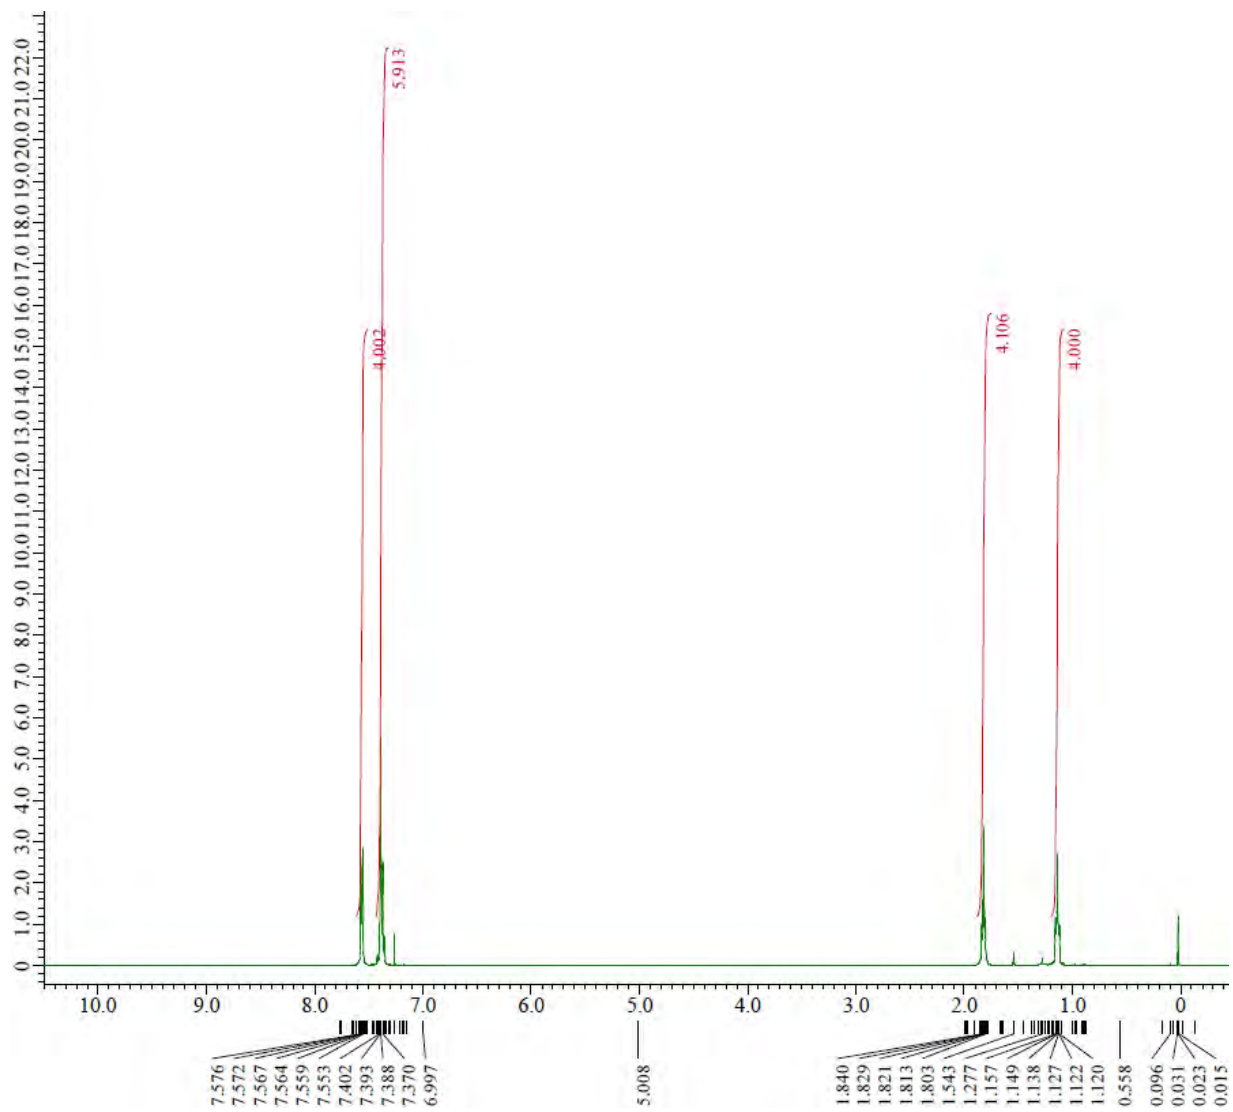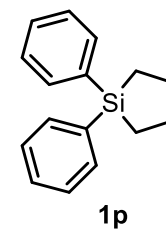

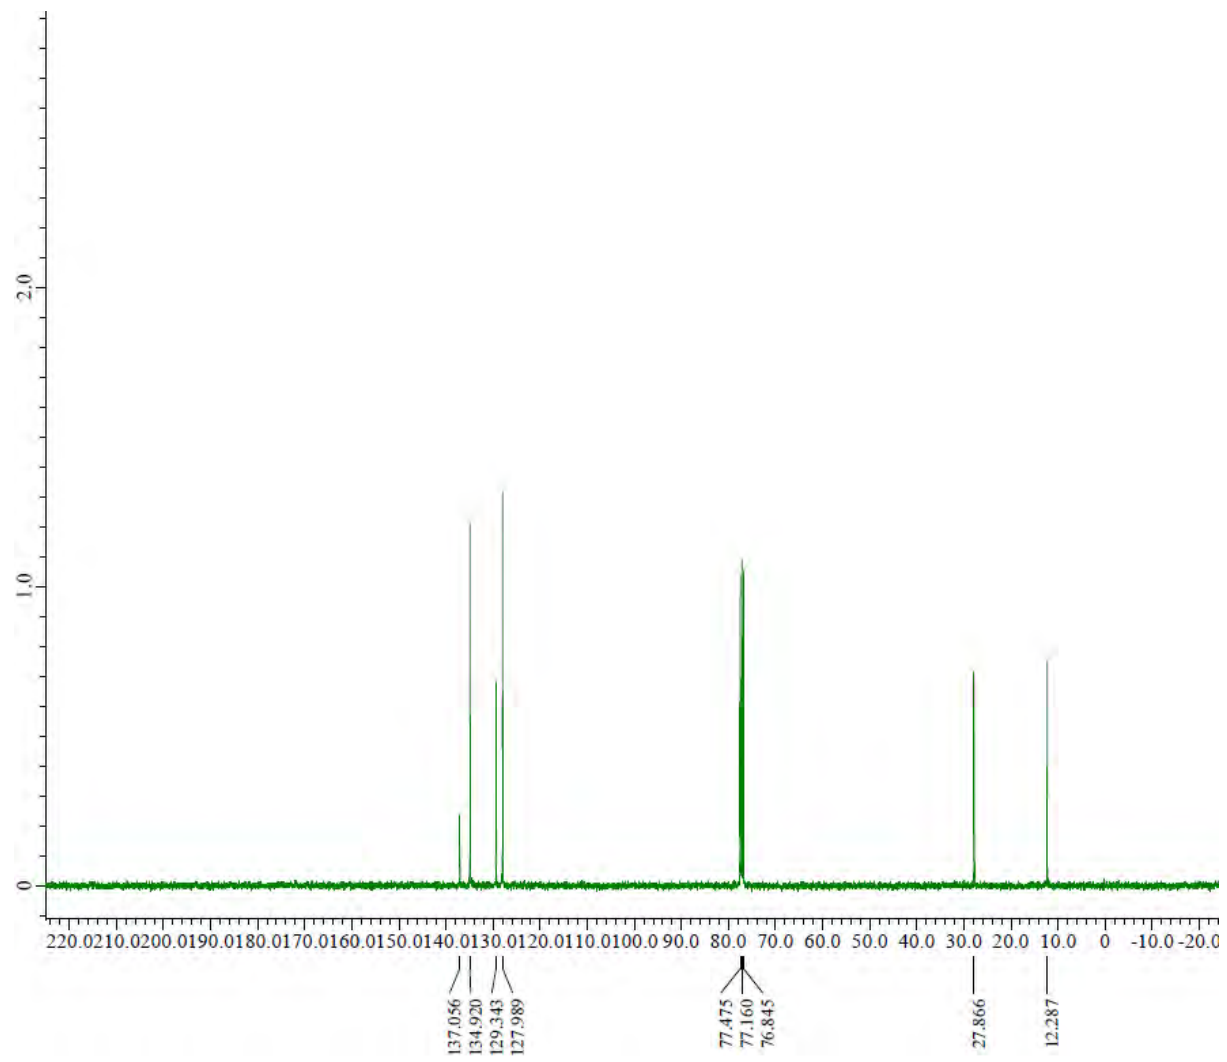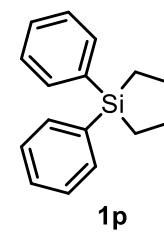

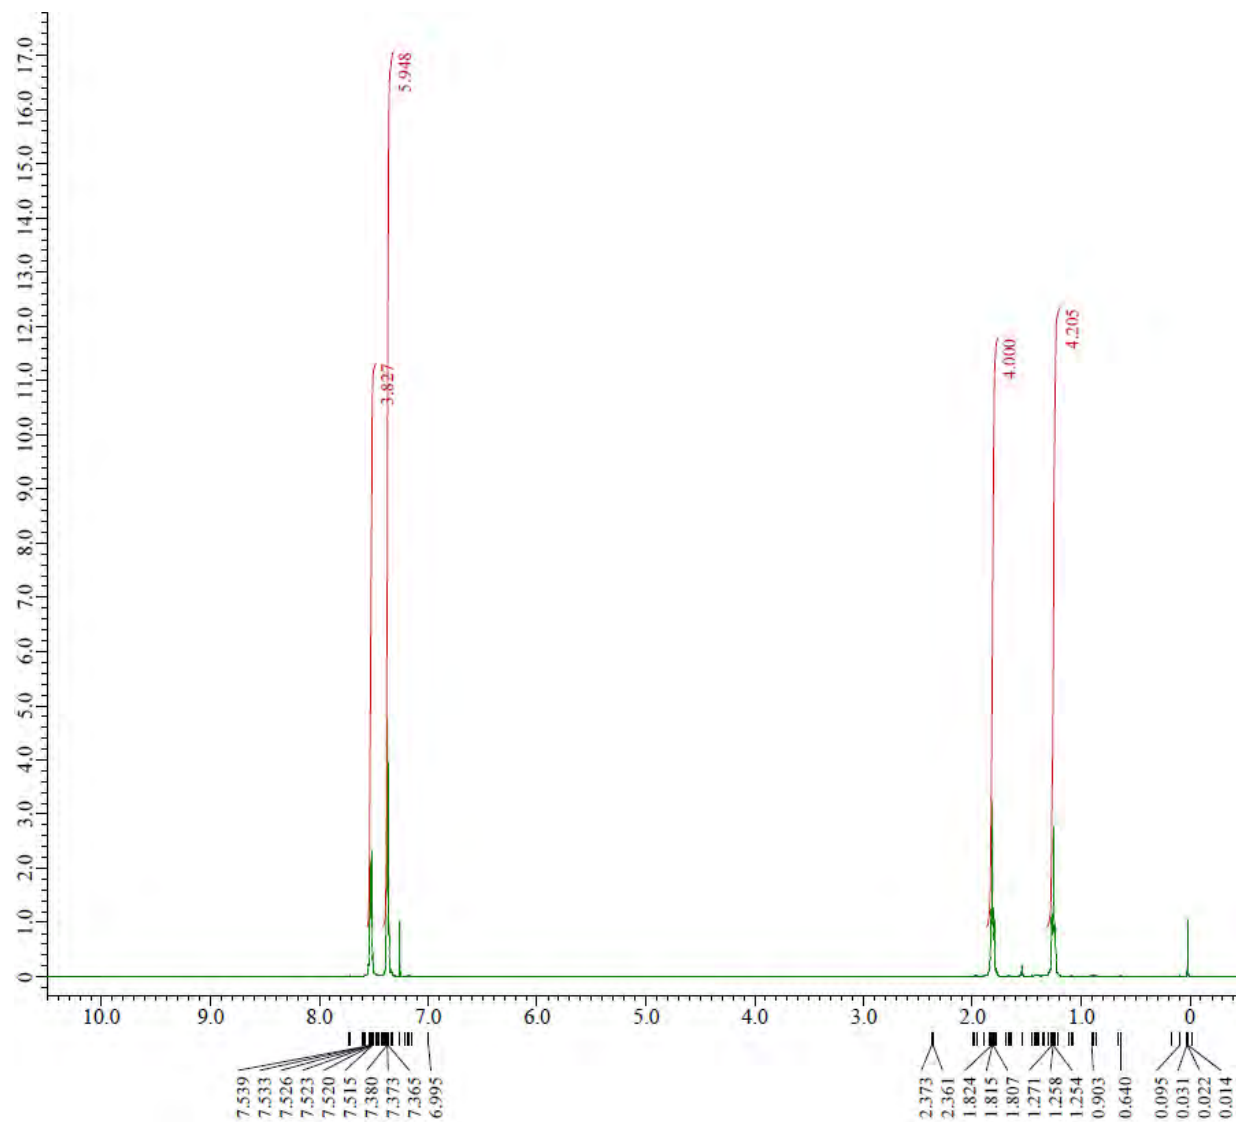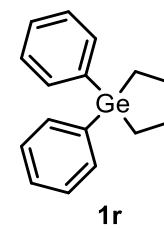

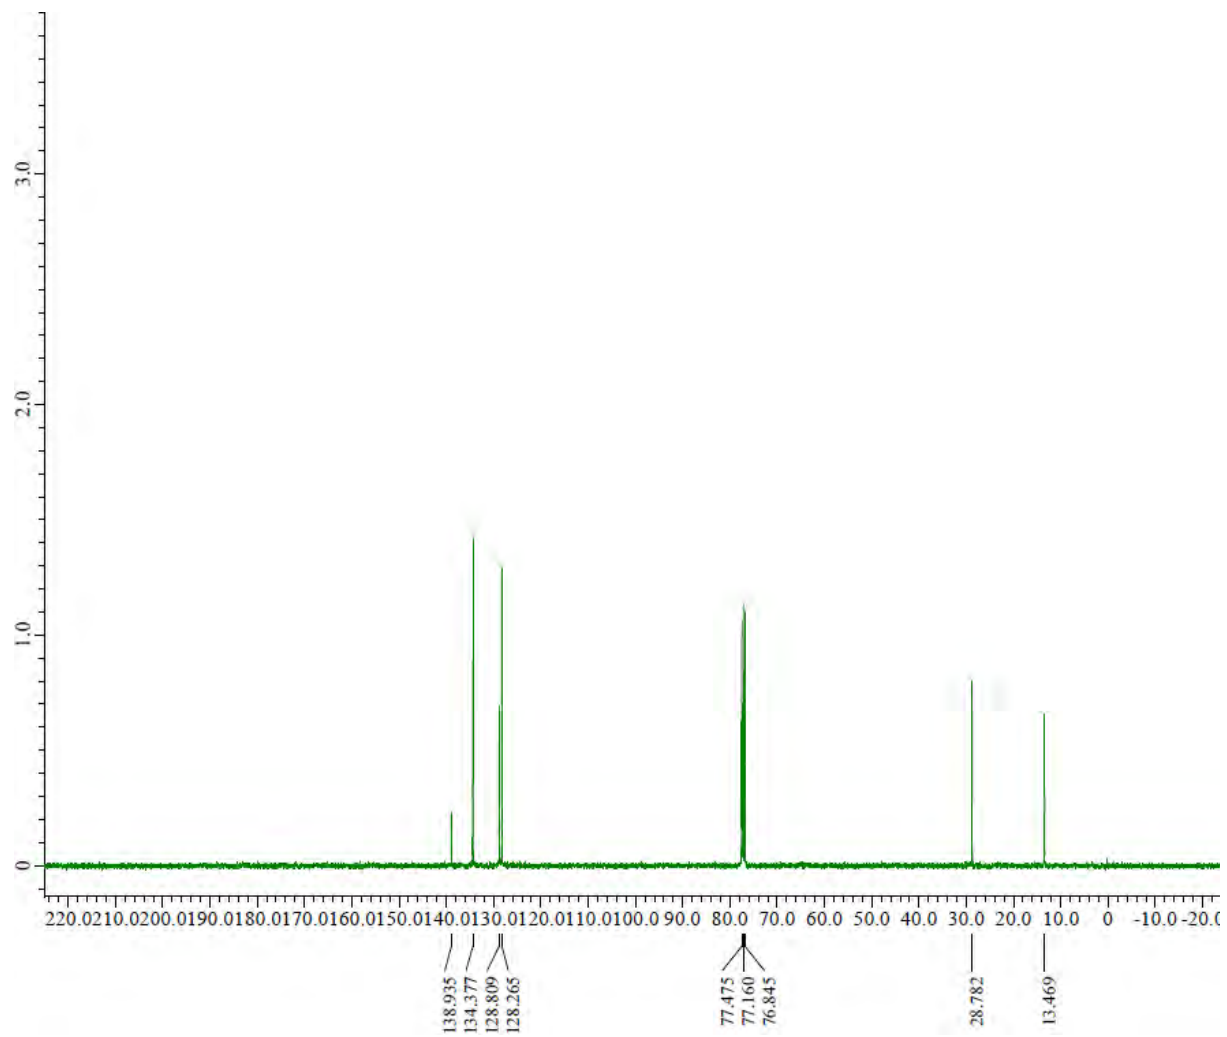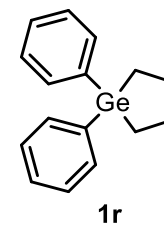

Supplement: d0cc00959h2.pdf [file d0cc00959h2.pdf]
